# Supplementary material for: Genomic DNA Methylation-Derived Algorithm Enables Accurate Detection of Malignant Prostate Tissues
Source: Front Oncol. 2018 Apr 23;8:100. doi: 10.3389/fonc.2018.00100 (PMC5925605; doi:10.3389/fonc.2018.00100)
Supplement: Supplementary file 2 [file Table_1.xlsx]

## Sheet: Table S1-CpGs
Table S1- CpGs differentially methylated in prostate cancer
probe ID	Chromosome	Position	Gene	Gene location	Enhancer	DNase hypersensitive sites	CpG Island	Methylation difference (Tumor - Normal)	Bonferroni corrected P-value
cg04364728	chr1	845810				TRUE	Island	0.246717	7.19849e-21
cg23207077	chr1	905988	PLEKHN1	Body			N_Shore	0.204985	3.5879e-15
cg22381068	chr1	906363	PLEKHN1	Body			Island	0.226635	2.24557e-15
cg16318112	chr1	969254	AGRN	Body		TRUE	Island	0.275588	4.31743e-20
cg09248054	chr1	969257	AGRN	Body		TRUE	Island	0.310627	1.06692e-18
cg04719903	chr1	1181956	FAM132A	1stExon	TRUE		Island	0.270339	1.56593e-17
cg25594899	chr1	1182226	FAM132A	TSS200			Island	0.219859	2.10437e-15
cg14089984	chr1	1182418	FAM132A	TSS1500			Island	0.254637	9.03429e-19
cg06443533	chr1	1182424	FAM132A	TSS1500			Island	0.323368	3.52286e-18
cg11648594	chr1	1566860	MMP23A	TSS1500	TRUE		Island	0.232299	5.27044e-15
cg05700129	chr1	1935125	KIAA1751	5'UTR		TRUE	N_Shore	0.212473	2.81325e-18
cg26067203	chr1	1935289	KIAA1751	TSS200		TRUE	Island	0.286729	4.49802e-18
cg23621729	chr1	1935445	KIAA1751	TSS200		TRUE	Island	0.210561	5.08082e-18
cg02361803	chr1	2014371	PRKCZ	Body			OpenSea	-0.216668	8.88501e-21
cg12526693	chr1	2145258			TRUE		S_Shore	0.201486	1.07118e-19
cg10397932	chr1	2166155	SKI	Body		TRUE	OpenSea	0.201977	1.18746e-23
cg13488570	chr1	2222253	SKI	Body	TRUE	TRUE	Island	0.324942	7.21544e-17
cg02737619	chr1	2222440	SKI	Body	TRUE	TRUE	Island	0.223703	2.19981e-18
cg22940848	chr1	2222486	SKI	Body	TRUE	TRUE	Island	0.24276	1.27128e-20
cg12053769	chr1	2461413	HES5	Body			Island	0.245515	2.1253e-16
cg09827752	chr1	2461823	HES5	TSS200			Island	0.367994	7.20395e-16
cg01116067	chr1	2461838	HES5	TSS200			Island	0.278992	6.51533e-17
cg06839900	chr1	2461900	HES5	TSS1500			Island	0.317914	1.06321e-16
cg15923947	chr1	2461929	HES5	TSS1500			Island	0.26066	4.82889e-21
cg09808235	chr1	2542588	MMEL1	Body	TRUE	TRUE	OpenSea	0.266954	1.24282e-14
cg06775523	chr1	3514921	MEGF6	Body	TRUE		S_Shelf	0.263971	5.73392e-22
cg09187007	chr1	3514990	MEGF6	Body	TRUE		S_Shelf	0.300587	7.26508e-23
cg24953596	chr1	3515194	MEGF6	Body	TRUE		S_Shelf	0.205984	2.95405e-17
cg07045089	chr1	3620218	TP73	Body		TRUE	N_Shelf	0.224501	8.64102e-19
cg14159342	chr1	3624292	TP73	Body			S_Shore	0.238677	1.62018e-20
cg02214783	chr1	3688257	LOC388588	TSS1500			N_Shore	0.224531	6.50217e-20
cg17175208	chr1	6241179	CHD5	TSS1500		TRUE	Island	0.21793	3.36405e-16
cg10976772	chr1	6390595	ACOT7	Body	TRUE	TRUE	OpenSea	0.231795	1.61571e-19
cg24153044	chr1	6485201	ESPN	1stExon			Island	0.220345	7.87218e-15
cg27539986	chr1	6664103	KLHL21	TSS1500			S_Shore	0.286815	3.00479e-24
cg09159285	chr1	6664134	KLHL21	TSS1500			S_Shore	0.212841	8.30269e-22
cg19884658	chr1	6664268	KLHL21	TSS1500			S_Shore	0.226606	3.11972e-20
cg00808305	chr1	7434171	CAMTA1	Body	TRUE		OpenSea	0.22441	8.4863e-21
cg18376288	chr1	8181555			TRUE		OpenSea	0.307371	6.32273e-22
cg10227331	chr1	8181647			TRUE		OpenSea	0.217367	3.97407e-20
cg21279510	chr1	8277627			TRUE		Island	0.285273	2.89783e-15
cg19886853	chr1	8277746			TRUE		Island	0.214102	3.33693e-14
cg03679305	chr1	9129487	SLC2A5	Body	TRUE		N_Shelf	0.280436	2.49452e-23
cg12763828	chr1	9129646	SLC2A5	5'UTR	TRUE		N_Shore	0.232282	3.91643e-24
cg00310940	chr1	9129648	SLC2A5	5'UTR	TRUE		N_Shore	0.233156	1.44666e-24
cg11231958	chr1	9509421			TRUE		OpenSea	0.221976	1.29039e-20
cg23251761	chr1	9750061	PIK3CD	5'UTR			Island	0.236731	2.62079e-21
cg24859236	chr1	9750213	PIK3CD	5'UTR			Island	0.217038	1.92815e-18
cg19858017	chr1	9884719	CLSTN1	TSS200			S_Shore	0.25914	3.81937e-17
cg00123104	chr1	9884732	CLSTN1	TSS200			S_Shore	0.268923	2.45791e-17
cg16134717	chr1	11752494	MAD2L2	TSS1500			Island	0.229078	4.81371e-19
cg12403889	chr1	11753338	C1orf187	5'UTR	TRUE		S_Shore	0.206717	1.13577e-20
cg03321020	chr1	11958326					OpenSea	0.226164	7.90704e-19
cg03529003	chr1	11994281	PLOD1	TSS1500			N_Shore	0.224336	8.32876e-22
cg00155063	chr1	12227825	TNFRSF1B	Body	TRUE	TRUE	S_Shore	0.220729	1.14462e-17
cg08538034	chr1	14928945	KIAA1026	Body			S_Shelf	0.226519	7.70377e-21
cg00809863	chr1	15251881	KIAA1026	Body			S_Shore	0.214946	9.16148e-22
cg10758286	chr1	15481367	TMEM51	5'UTR			Island	0.217631	2.9187e-19
cg18147543	chr1	16276294	ZBTB17	5'UTR	TRUE	TRUE	OpenSea	0.203689	2.23011e-20
cg07146104	chr1	16489048				TRUE	OpenSea	0.239456	5.53362e-19
cg23072161	chr1	16489115				TRUE	OpenSea	0.212324	1.58808e-18
cg02998240	chr1	16508668			TRUE	TRUE	OpenSea	0.219565	3.0136e-19
cg14429204	chr1	16553327			TRUE		Island	0.22043	8.32567e-21
cg02987928	chr1	16553456			TRUE	TRUE	Island	0.202079	1.19121e-16
cg16680438	chr1	16553549			TRUE	TRUE	Island	0.220752	4.33105e-16
cg13171718	chr1	16974255	MST1P2	Body		TRUE	Island	0.200581	6.19123e-17
cg17285883	chr1	17896290	ARHGEF10L	5'UTR	TRUE	TRUE	OpenSea	0.215818	1.75955e-25
cg00388391	chr1	18459578	IGSF21	Body	TRUE		OpenSea	0.206405	2.74414e-20
cg07536847	chr1	18957232	PAX7	TSS1500	TRUE		Island	0.24144	4.16584e-14
cg00794881	chr1	19043573	PAX7	Body	TRUE		Island	0.217591	6.52548e-18
cg26924440	chr1	19276353	IFFO2	Body	TRUE	TRUE	OpenSea	0.202466	6.41383e-20
cg27549720	chr1	19992167	HTR6	5'UTR	TRUE	TRUE	Island	0.232505	3.39187e-16
cg24685601	chr1	20512550	UBXN10	TSS200			Island	0.23306	5.24667e-19
cg11651220	chr1	20512944	UBXN10	5'UTR			S_Shore	0.252431	4.46479e-19
cg06377106	chr1	20618331	VWA5B1	5'UTR			OpenSea	0.242871	2.92395e-19
cg06444282	chr1	20669975	VWA5B1	Body		TRUE	Island	0.240704	6.10473e-18
cg06897478	chr1	20799799				TRUE	OpenSea	0.238404	2.56315e-22
cg15653910	chr1	20799948				TRUE	OpenSea	0.224845	6.6062e-23
cg08892236	chr1	21978698	RAP1GAP	5'UTR		TRUE	Island	0.226149	5.8263e-16
cg02790379	chr1	22140769	LDLRAD2	Body			N_Shore	0.225844	2.0973e-18
cg15467646	chr1	22141014	LDLRAD2	Body		TRUE	Island	0.293034	1.13328e-23
cg25138553	chr1	22223841	HSPG2	Body		TRUE	OpenSea	0.207709	1.49822e-21
cg17841765	chr1	22560699			TRUE		OpenSea	0.263087	4.50028e-20
cg09180171	chr1	22677913					OpenSea	0.272212	6.72181e-18
cg26530485	chr1	23496304	LUZP1	TSS1500			OpenSea	0.203674	9.76682e-22
cg14616251	chr1	24648696	GRHL3	TSS1500		TRUE	Island	0.271604	1.44581e-22
cg22176324	chr1	24648851	GRHL3	TSS1500		TRUE	Island	0.278824	4.86727e-25
cg05036846	chr1	24648984	GRHL3	TSS1500		TRUE	Island	0.242915	2.90074e-24
cg11709405	chr1	24649398	GRHL3	TSS200		TRUE	S_Shore	0.220911	3.44733e-22
cg10706230	chr1	25944514	MAN1C1	1stExon			Island	0.292637	1.31099e-16
cg16836311	chr1	25944712	MAN1C1	1stExon			Island	0.255942	2.43955e-16
cg05154698	chr1	26202441				TRUE	Island	0.227913	1.09127e-14
cg20415053	chr1	26527928	CATSPER4	Body	TRUE	TRUE	OpenSea	0.232879	1.67055e-14
cg04145287	chr1	26552102				TRUE	Island	0.209623	5.96537e-19
cg05770238	chr1	26686587			TRUE		Island	0.24977	4.01094e-15
cg09668030	chr1	27852173				TRUE	N_Shelf	0.259465	5.61895e-17
cg13920090	chr1	27872303	AHDC1	3'UTR	TRUE	TRUE	N_Shelf	0.203429	7.59023e-21
cg25273602	chr1	29062859	YTHDF2	TSS1500			N_Shore	0.202437	3.96957e-16
cg00456651	chr1	31380425	SDC3	Body			N_Shore	0.20882	1.09323e-21
cg07345934	chr1	31845943	FABP3	TSS200		TRUE	OpenSea	0.244829	1.18976e-15
cg18368411	chr1	31845959	FABP3	TSS200		TRUE	OpenSea	0.223309	1.31307e-14
cg11573219	chr1	32083031	HCRTR1	TSS1500	TRUE		N_Shore	0.247471	4.09002e-19
cg26833120	chr1	32169568	COL16A1	1stExon		TRUE	Island	0.201829	2.39225e-21
cg23305408	chr1	32169701	COL16A1	1stExon			Island	0.244882	1.08009e-23
cg05003322	chr1	32169706	COL16A1	1stExon		TRUE	Island	0.238423	5.43739e-25
cg00925616	chr1	32410211			TRUE	TRUE	Island	0.21085	1.38606e-17
cg04881103	chr1	32410413			TRUE	TRUE	Island	0.220501	3.43351e-18
cg11756095	chr1	32410614			TRUE	TRUE	Island	0.266494	2.41683e-19
cg05923595	chr1	33547713	ADC	5'UTR	TRUE		S_Shore	0.33267	3.40429e-26
cg06851000	chr1	33627109	TRIM62	Body			S_Shore	0.237999	3.38448e-19
cg21416692	chr1	33803805	PHC2	5'UTR	TRUE		OpenSea	0.212008	2.49321e-22
cg22795212	chr1	33938026	ZSCAN20	TSS1500			Island	0.250038	4.39123e-14
cg14041778	chr1	33938210	ZSCAN20	TSS200			Island	0.234994	6.73253e-15
cg16354201	chr1	33938307	ZSCAN20	5'UTR			Island	0.313803	4.69997e-16
cg24411961	chr1	34642396	C1orf94	5'UTR			Island	0.209832	5.77629e-15
cg13364230	chr1	35258779	GJA4	5'UTR			Island	0.210423	2.93264e-23
cg12126857	chr1	35384669			TRUE		OpenSea	0.233911	1.75495e-16
cg25035631	chr1	35586358					Island	0.21361	1.20719e-16
cg14615266	chr1	35586649					S_Shore	0.206449	1.38415e-16
cg18131141	chr1	36043002	TFAP2E	Body		TRUE	Island	0.228336	6.03332e-16
cg24685006	chr1	36043014	TFAP2E	Body		TRUE	Island	0.222799	2.92643e-16
cg07091016	chr1	36174005			TRUE	TRUE	S_Shore	0.308266	6.32283e-19
cg03507534	chr1	36789937	FAM176B	TSS200			S_Shore	0.241795	2.44196e-18
cg13423759	chr1	37937403				TRUE	N_Shelf	0.225285	1.85764e-15
cg24375409	chr1	38200920	EPHA10	Body			Island	0.401348	3.42706e-20
cg04622024	chr1	38201001	EPHA10	Body			Island	0.257103	7.58603e-22
cg11664987	chr1	38201123	EPHA10	Body			Island	0.318286	2.98175e-22
cg24519393	chr1	38470540	FHL3	5'UTR		TRUE	N_Shore	0.256434	7.35705e-20
cg06086731	chr1	38942075					Island	0.200192	4.44428e-15
cg10626816	chr1	39025249					OpenSea	0.33321	4.11859e-17
cg11716270	chr1	39025311					OpenSea	0.285484	7.60308e-17
cg20286956	chr1	39547918	MACF1	5'UTR		TRUE	Island	0.291535	2.57074e-20
cg13457165	chr1	40105079	HEYL	Body		TRUE	Island	0.215545	3.31072e-22
cg23037132	chr1	40105664	HEYL	TSS1500		TRUE	Island	0.201088	2.63062e-16
cg01656955	chr1	40137966	NT5C1A	TSS1500	TRUE		Island	0.238118	2.12962e-25
cg18862767	chr1	40137970	NT5C1A	TSS1500	TRUE	TRUE	Island	0.237195	2.11273e-21
cg00990022	chr1	40138052	NT5C1A	TSS1500	TRUE	TRUE	Island	0.246062	1.95402e-23
cg22851420	chr1	40149650	HPCAL4	Body			Island	0.239335	5.43829e-21
cg18438793	chr1	40149837	HPCAL4	Body			Island	0.323215	4.22374e-17
cg03741406	chr1	40255103	BMP8B	TSS1500			Island	0.211069	1.87279e-15
cg08551248	chr1	40255129	BMP8B	TSS1500			Island	0.201001	1.1606e-15
cg15355146	chr1	40368366	MYCL1	TSS1500			S_Shore	0.233186	8.17611e-19
cg10512203	chr1	40780905	COL9A2	Body	TRUE		N_Shore	0.208383	1.04312e-19
cg20145692	chr1	40781289	COL9A2	Body	TRUE		Island	0.234914	1.04224e-14
cg16328007	chr1	41119988	RIMS3	5'UTR			Island	0.210511	2.06702e-15
cg19689322	chr1	41284639	KCNQ4	Body	TRUE	TRUE	N_Shore	0.202032	1.73876e-15
cg13150171	chr1	41326892	CITED4	3'UTR			N_Shore	0.253124	8.77804e-19
cg19619003	chr1	41846758			TRUE		N_Shore	0.247159	3.32522e-26
cg00596048	chr1	41847267					Island	0.294015	1.42531e-17
cg06359703	chr1	41847297					Island	0.357653	2.54787e-16
cg19309616	chr1	41851836					S_Shelf	0.202645	3.30195e-19
cg27232866	chr1	43251073			TRUE		Island	0.286827	1.74854e-15
cg19254906	chr1	43251253			TRUE		S_Shore	0.247047	7.69605e-17
cg00778807	chr1	43524347			TRUE		OpenSea	0.261893	1.65762e-18
cg02584756	chr1	43533796				TRUE	N_Shore	0.249974	1.41614e-15
cg23671221	chr1	44031300	PTPRF	Body			Island	0.220116	2.72654e-16
cg10881128	chr1	44031826	PTPRF	Body			Island	0.229668	2.53626e-15
cg20634514	chr1	44703750	ERI3	Body		TRUE	OpenSea	0.221433	1.62059e-21
cg25363807	chr1	44703923	ERI3	Body		TRUE	OpenSea	0.280058	4.6275e-21
cg10431481	chr1	45249875	BEST4	3'UTR	TRUE		Island	0.223615	2.98682e-19
cg04108939	chr1	45250181	BEST4	Body	TRUE		Island	0.282001	2.50597e-19
cg04886703	chr1	45250266	BEST4	Body	TRUE		Island	0.260206	3.19647e-20
cg11448683	chr1	45274099	TCTEX1D4	TSS1500	TRUE		S_Shore	0.2199	2.96889e-15
cg09065413	chr1	45285821	PTCH2	3'UTR	TRUE		OpenSea	0.218938	2.50733e-16
cg27292588	chr1	45285892	PTCH2	3'UTR	TRUE		OpenSea	0.264261	1.59141e-16
cg00329697	chr1	45286062	PTCH2	3'UTR	TRUE		OpenSea	0.246521	4.33351e-14
cg01913970	chr1	45308593	PTCH2	1stExon			Island	0.220812	4.30179e-15
cg14796305	chr1	46632581			TRUE		N_Shore	0.207134	4.0857e-20
cg27636310	chr1	46632696			TRUE		Island	0.275798	1.26489e-18
cg14709691	chr1	46632871			TRUE		Island	0.309619	1.57177e-19
cg19856273	chr1	46668472	C1orf190	TSS1500		TRUE	N_Shore	0.237038	8.2116e-22
cg15696662	chr1	46669221	C1orf190	1stExon		TRUE	Island	0.249799	7.21986e-19
cg24542714	chr1	46669345	POMGNT1	Body		TRUE	S_Shore	0.279449	1.77385e-23
cg25757115	chr1	46913787			TRUE		Island	0.277162	2.33943e-18
cg14258341	chr1	46914023			TRUE		Island	0.375635	9.8934e-22
cg00279790	chr1	46914033			TRUE		Island	0.396823	3.3261e-22
cg13922291	chr1	46914528					S_Shore	0.219158	1.64948e-21
cg03257575	chr1	46951318					Island	0.346157	6.91623e-20
cg19807257	chr1	46951354					Island	0.313263	1.10105e-16
cg03401357	chr1	46951477					Island	0.201686	3.33929e-16
cg22604316	chr1	46958801			TRUE		S_Shore	0.211747	1.58373e-15
cg06660332	chr1	47009707			TRUE		Island	0.252715	7.41733e-19
cg14415160	chr1	47010105			TRUE	TRUE	Island	0.21948	2.03691e-17
cg06760830	chr1	47079672	MOBKL2C	Body		TRUE	S_Shore	0.245138	3.22528e-22
cg06087421	chr1	47695138	TAL1	5'UTR			N_Shore	0.245939	3.25068e-18
cg00875272	chr1	47695321	TAL1	5'UTR			N_Shore	0.212699	1.22456e-17
cg19797376	chr1	47695475	TAL1	TSS200			N_Shore	0.239809	1.11841e-18
cg26891410	chr1	47696260	TAL1	TSS1500		TRUE	N_Shore	0.205991	7.33301e-16
cg10633601	chr1	47696701	TAL1	TSS1500	TRUE	TRUE	Island	0.204234	2.44691e-14
cg25764899	chr1	47697948			TRUE	TRUE	Island	0.303899	1.42922e-17
cg04363624	chr1	47697965			TRUE	TRUE	Island	0.23719	1.90709e-15
cg22796507	chr1	47882739	FOXE3	1stExon	TRUE	TRUE	Island	0.244857	2.20584e-18
cg11856897	chr1	47998999			TRUE	TRUE	Island	0.303913	1.31339e-14
cg02486904	chr1	47999051			TRUE	TRUE	Island	0.256408	1.78683e-15
cg22524657	chr1	47999163			TRUE	TRUE	Island	0.4113	2.27426e-16
cg25137711	chr1	48059173			TRUE		Island	0.230676	5.2941e-22
cg09704415	chr1	48937250	SPATA6	Body	TRUE		N_Shore	0.27201	2.26655e-19
cg01710865	chr1	48937404	SPATA6	Body			Island	0.408614	7.93192e-21
cg18267506	chr1	48937445	SPATA6	Body			Island	0.267902	3.14906e-22
cg16391955	chr1	50881185					Island	0.233778	2.77422e-18
cg22711792	chr1	50883329	DMRTA2	3'UTR			Island	0.218278	7.35735e-16
cg23097402	chr1	50883394	DMRTA2	3'UTR			Island	0.207623	5.43251e-18
cg10512745	chr1	50884480	DMRTA2	Body			Island	0.241103	5.45035e-16
cg07362328	chr1	50886393	DMRTA2	Body			Island	0.200612	3.58016e-16
cg00945234	chr1	50886411	DMRTA2	Body			Island	0.20868	1.0223e-17
cg16732616	chr1	50886782	DMRTA2	Body			Island	0.262912	4.02715e-15
cg25191628	chr1	50886949	DMRTA2	Body			Island	0.216349	1.43551e-21
cg12756396	chr1	50886969	DMRTA2	Body			Island	0.200532	1.27228e-22
cg17800654	chr1	50888590	DMRTA2	5'UTR			Island	0.296873	1.42308e-17
cg26560222	chr1	50888826	DMRTA2	1stExon			Island	0.219724	6.94852e-20
cg19380001	chr1	50889427	DMRTA2	TSS1500			Island	0.208522	1.16317e-18
cg10776919	chr1	50889442	DMRTA2	TSS1500			Island	0.249003	1.52654e-16
cg06645033	chr1	50890678					Island	0.240469	1.21516e-18
cg11665991	chr1	50893469					Island	0.203973	3.65243e-16
cg09941363	chr1	51730449	RNF11	Body	TRUE	TRUE	OpenSea	0.205846	1.83753e-21
cg26251270	chr1	53067832	GPX7	TSS1500		TRUE	N_Shore	0.210945	2.53941e-16
cg23272399	chr1	53068579	GPX7	Body	TRUE	TRUE	Island	0.240782	2.3278e-16
cg02453146	chr1	53068587	GPX7	Body	TRUE	TRUE	Island	0.200498	1.9374e-15
cg00397635	chr1	53309162	ZYG11A	Body		TRUE	Island	0.285813	1.0144e-15
cg04918175	chr1	53527424	PODN	TSS1500	TRUE	TRUE	N_Shore	0.220165	9.37296e-22
cg04765848	chr1	53527576	PODN	TSS1500			Island	0.31285	5.19345e-26
cg23092823	chr1	53528612	PODN	Body		TRUE	Island	0.245638	1.78386e-21
cg04562138	chr1	53966412					OpenSea	0.212773	1.77181e-18
cg09820244	chr1	54790722	SSBP3	Body	TRUE		OpenSea	0.231628	1.46622e-21
cg04605287	chr1	54953486					N_Shore	0.236532	1.66057e-15
cg00590761	chr1	55008319			TRUE		Island	0.284536	1.67978e-20
cg17001034	chr1	55008516			TRUE		S_Shore	0.213025	2.56309e-24
cg21527621	chr1	55013419	ACOT11	TSS1500		TRUE	OpenSea	0.242346	2.82922e-24
cg10266490	chr1	55013709	ACOT11	TSS200			OpenSea	0.267276	4.5293e-23
cg19302183	chr1	56397400			TRUE		OpenSea	0.229382	1.30644e-19
cg26837800	chr1	56842338			TRUE		OpenSea	0.220733	7.90514e-24
cg11682697	chr1	56992372	PPAP2B	Body	TRUE		OpenSea	0.237195	8.62989e-25
cg00848728	chr1	58716018	DAB1	5'UTR			Island	0.233449	5.63389e-22
cg24351410	chr1	58716033	DAB1	5'UTR			Island	0.262934	3.37573e-24
cg11256607	chr1	58716306	DAB1	TSS200			S_Shore	0.258586	3.89199e-24
cg23723410	chr1	59486037			TRUE	TRUE	OpenSea	0.20162	4.32631e-19
cg15935965	chr1	59550124			TRUE		OpenSea	0.201879	1.21504e-20
cg19526130	chr1	59612408	LOC729467	Body			Island	0.266858	2.56415e-16
cg08625289	chr1	59612492	LOC729467	TSS200			Island	0.245754	3.93523e-16
cg26246897	chr1	59612710	LOC729467	TSS1500			Island	0.245168	2.10405e-15
cg11425788	chr1	60136100	FGGY	Body	TRUE		OpenSea	0.222784	1.82829e-16
cg00914726	chr1	60539400	C1orf87	1stExon			Island	0.205259	5.97826e-19
cg17042098	chr1	61519631					Island	0.233132	7.36264e-15
cg09550810	chr1	61519890					Island	0.203043	2.67762e-17
cg23049458	chr1	62660624	L1TD1	5'UTR			Island	0.279304	6.25494e-19
cg05539515	chr1	62784269	KANK4	5'UTR			Island	0.218458	1.45551e-21
cg08845123	chr1	62784332	KANK4	5'UTR			Island	0.329272	5.48712e-23
cg23166865	chr1	63539729			TRUE		OpenSea	0.268379	6.96353e-19
cg17941572	chr1	63784454					Island	0.23925	2.09981e-19
cg02283366	chr1	63785544					Island	0.236167	5.891e-21
cg06962177	chr1	63785946					Island	0.288883	4.07536e-18
cg13906377	chr1	63792695					N_Shelf	0.245749	1.03752e-14
cg20321153	chr1	63795435			TRUE		Island	0.213229	4.85429e-17
cg00347677	chr1	63795636			TRUE		Island	0.265969	2.49643e-18
cg05923687	chr1	63795711			TRUE		Island	0.272444	1.32927e-18
cg21244177	chr1	63795848			TRUE		Island	0.210188	1.37631e-18
cg10249375	chr1	63795934			TRUE		Island	0.333561	6.01549e-17
cg15837212	chr1	63795970					Island	0.202571	4.71024e-16
cg21695661	chr1	63796263					S_Shore	0.26191	1.57121e-23
cg26262482	chr1	64937345	CACHD1	Body			S_Shore	0.322308	2.1868e-21
cg24306340	chr1	64937451	CACHD1	Body			S_Shore	0.271583	1.87911e-20
cg01521258	chr1	64937528	CACHD1	Body			S_Shore	0.244982	3.7347e-20
cg01340542	chr1	65468273					Island	0.222159	3.07582e-16
cg11989330	chr1	65468827					Island	0.247769	1.42901e-14
cg08856601	chr1	65730351	DNAJC6	TSS200			N_Shore	0.207725	1.16182e-16
cg09235539	chr1	65730481	DNAJC6	5'UTR			N_Shore	0.225591	8.00619e-18
cg09082287	chr1	65730494	DNAJC6	5'UTR			N_Shore	0.211246	1.82074e-17
cg00466108	chr1	65731689	DNAJC6	Body	TRUE		Island	0.24062	1.26341e-17
cg07027116	chr1	65731738	DNAJC6	Body	TRUE		Island	0.254928	2.39654e-14
cg16294013	chr1	66258022	PDE4B	TSS200			N_Shore	0.237947	5.37668e-19
cg22336004	chr1	66258035	PDE4B	TSS200			N_Shore	0.202463	3.43581e-17
cg22488256	chr1	66258046	PDE4B	TSS200			N_Shore	0.278473	1.07098e-17
cg00460049	chr1	66998806	SGIP1	TSS1500			Island	0.280182	3.14308e-21
cg14610403	chr1	66998812	SGIP1	TSS1500			Island	0.30607	1.47554e-22
cg17162576	chr1	66999059	SGIP1	TSS1500			Island	0.288354	9.2643e-25
cg13052034	chr1	66999238	SGIP1	TSS1500		TRUE	S_Shore	0.306654	1.33905e-14
cg00920348	chr1	66999304	SGIP1	TSS1500		TRUE	S_Shore	0.301239	1.62534e-17
cg27558095	chr1	66999588	SGIP1	TSS1500		TRUE	S_Shore	0.291014	8.05622e-15
cg00089915	chr1	66999684	SGIP1	TSS200		TRUE	S_Shore	0.226996	1.40306e-15
cg02994349	chr1	66999753	SGIP1	TSS200		TRUE	S_Shore	0.267271	2.25028e-16
cg25203031	chr1	66999813	SGIP1	TSS200		TRUE	S_Shore	0.297269	2.35691e-16
cg24110050	chr1	67217853	TCTEX1D1	TSS1500	TRUE		N_Shore	0.205499	4.6489e-17
cg14207728	chr1	67217886	TCTEX1D1	TSS1500	TRUE		N_Shore	0.223196	1.58773e-16
cg17284804	chr1	67218135	TCTEX1D1	TSS200	TRUE		Island	0.232081	7.86327e-20
cg25339566	chr1	67218165	TCTEX1D1	5'UTR	TRUE		Island	0.319955	2.70746e-21
cg12940439	chr1	67600707					Island	0.201705	2.73379e-16
cg00165323	chr1	70035080			TRUE		S_Shore	0.263984	9.48681e-16
cg00338801	chr1	70035208			TRUE		S_Shore	0.254774	4.65921e-17
cg22812684	chr1	70035392			TRUE		S_Shore	0.276587	3.70676e-19
cg23624008	chr1	70035479			TRUE		S_Shore	0.276379	7.54393e-17
cg17177995	chr1	70035846					S_Shore	0.233179	5.30632e-21
cg20457732	chr1	71172486			TRUE		OpenSea	0.276771	6.34474e-23
cg22694818	chr1	75595970	LHX8	5'UTR	TRUE		Island	0.210696	1.46952e-15
cg08146483	chr1	75602412	LHX8	Body			Island	0.275417	2.46853e-18
cg05725004	chr1	76082568					S_Shore	0.218419	1.13592e-23
cg20818417	chr1	76082690					S_Shore	0.344858	1.55687e-18
cg26940178	chr1	76082888					S_Shore	0.244467	2.8136e-15
cg12601757	chr1	76540465	ST6GALNAC3	1stExon		TRUE	Island	0.206214	1.19421e-18
cg21526205	chr1	76540574	ST6GALNAC3	Body		TRUE	Island	0.310471	6.71223e-19
cg27538686	chr1	76540641	ST6GALNAC3	Body		TRUE	Island	0.261291	7.69648e-22
cg25272065	chr1	77334678	ST6GALNAC5	Body			S_Shore	0.27148	6.24793e-23
cg02639927	chr1	77334748	ST6GALNAC5	Body			S_Shore	0.23149	1.56389e-17
cg00347563	chr1	78511600	GIPC2	1stExon		TRUE	Island	0.227675	1.52564e-14
cg25288420	chr1	78511713	GIPC2	1stExon		TRUE	Island	0.219248	3.17193e-19
cg04912843	chr1	78511856	GIPC2	1stExon		TRUE	Island	0.284532	3.7882e-17
cg27315157	chr1	79086197	IFI44L	5'UTR			OpenSea	0.201553	3.04315e-17
cg14319235	chr1	79472282	ELTD1	Body	TRUE		Island	0.216563	4.69607e-22
cg21113740	chr1	79472343	ELTD1	5'UTR	TRUE		Island	0.259776	1.67898e-23
cg04360793	chr1	79472361	ELTD1	5'UTR	TRUE		Island	0.338986	1.76508e-21
cg15084543	chr1	79472408	ELTD1	5'UTR	TRUE		Island	0.302497	1.05816e-17
cg26422458	chr1	79472452	ELTD1	5'UTR	TRUE		Island	0.252974	1.43369e-20
cg11654024	chr1	85230119			TRUE		OpenSea	0.228963	1.02993e-23
cg07478468	chr1	85464000	MCOLN2	TSS1500		TRUE	Island	0.301493	6.36527e-18
cg15639684	chr1	85464110	MCOLN2	TSS1500		TRUE	Island	0.298742	2.77392e-20
cg06402325	chr1	85464166	MCOLN2	TSS1500			Island	0.228824	2.23435e-19
cg23106912	chr1	85464261	MCOLN2	TSS1500		TRUE	S_Shore	0.229018	1.66173e-19
cg16683160	chr1	87617710	LOC339524	Body	TRUE	TRUE	Island	0.22124	1.30366e-17
cg04246763	chr1	87617811	LOC339524	Body	TRUE	TRUE	Island	0.293715	1.40994e-16
cg15575982	chr1	87796349	LMO4	5'UTR			N_Shore	0.20113	1.66976e-15
cg14254720	chr1	90097981	LRRC8C	TSS1500			N_Shore	0.242187	6.96496e-20
cg11823511	chr1	91183697	BARHL2	TSS1500			Island	0.251967	6.59197e-16
cg20311863	chr1	91184126	BARHL2	TSS1500	TRUE		Island	0.227494	7.47202e-15
cg12656020	chr1	91185028			TRUE		N_Shore	0.205291	7.44669e-15
cg22507154	chr1	91185233					Island	0.246168	4.24592e-21
cg24884703	chr1	91185422					Island	0.260611	3.13119e-17
cg16058493	chr1	91189167					Island	0.284113	2.05346e-18
cg15469272	chr1	91189314					Island	0.24872	8.34911e-19
cg26568372	chr1	91190173					N_Shore	0.242966	4.3698e-19
cg15452970	chr1	91190620					Island	0.204898	4.68719e-18
cg14663264	chr1	91192798					Island	0.203061	2.9008e-16
cg12071888	chr1	91195159			TRUE		S_Shelf	0.216522	2.02966e-16
cg04560225	chr1	91195336			TRUE		S_Shelf	0.21752	9.25942e-15
cg16400631	chr1	91300215			TRUE		N_Shore	0.234331	4.38173e-16
cg00644823	chr1	91301461					Island	0.201074	6.31777e-18
cg00503383	chr1	91301651					Island	0.319492	7.55029e-17
cg18235734	chr1	91301731					Island	0.304614	2.00548e-17
cg17799946	chr1	91301962					S_Shore	0.217802	1.37251e-18
cg14179389	chr1	92947961	GFI1	Body			Island	0.244153	5.72583e-15
cg04158367	chr1	92952440	GFI1	TSS1500			Island	0.257191	6.48844e-15
cg26027669	chr1	92952467	GFI1	TSS1500			Island	0.237423	5.15791e-18
cg17858328	chr1	92952521	GFI1	TSS1500			Island	0.24377	3.6083e-15
cg18060199	chr1	94146495	BCAR3	5'UTR			Island	0.271588	2.49734e-17
cg14995036	chr1	94146705	BCAR3	5'UTR			Island	0.224587	1.90697e-14
cg18344652	chr1	95393096	CNN3	TSS1500			Island	0.259571	1.70978e-14
cg16127594	chr1	95393115	CNN3	TSS1500			Island	0.279324	9.21204e-15
cg26227186	chr1	95393138	CNN3	TSS1500			S_Shore	0.202083	3.28913e-15
cg09896412	chr1	98519101			TRUE		Island	0.242074	8.4056e-22
cg14991984	chr1	99470129	LPPR5	1stExon			Island	0.22797	7.16589e-15
cg03120289	chr1	99470550	LPPR5	TSS200			Island	0.200561	2.27274e-14
cg09408571	chr1	101003634	GPR88	TSS200			N_Shore	0.211572	6.79177e-20
cg06223162	chr1	101003688	GPR88	TSS200			N_Shore	0.202857	4.63377e-19
cg00758069	chr1	107682552	NTNG1	TSS200			N_Shore	0.222921	5.65469e-15
cg09822538	chr1	107682798	NTNG1	1stExon			N_Shore	0.204419	6.93641e-15
cg24346905	chr1	108023249	NTNG1	Body			Island	0.207222	5.54174e-17
cg24323958	chr1	108741884	SLC25A24	Body			N_Shore	0.20925	2.97529e-19
cg12647497	chr1	110210265	GSTM2	TSS1500	TRUE		N_Shore	0.212872	4.07313e-19
cg20676696	chr1	110210444	GSTM2	TSS200	TRUE	TRUE	N_Shore	0.283153	4.23249e-21
cg02337836	chr1	110210641	GSTM2	TSS200	TRUE	TRUE	Island	0.243823	7.37692e-20
cg07219542	chr1	110210770	GSTM2	1stExon	TRUE	TRUE	Island	0.293124	1.03979e-20
cg03942855	chr1	110210925	GSTM2	Body	TRUE	TRUE	Island	0.398582	7.87585e-22
cg25210835	chr1	110254828	GSTM5	TSS200			OpenSea	0.201904	1.99793e-14
cg18786873	chr1	110610899	ALX3	Body	TRUE		Island	0.218999	2.25015e-17
cg11071207	chr1	110611218	ALX3	Body	TRUE		Island	0.234161	5.42442e-20
cg06215569	chr1	110611465	ALX3	Body	TRUE		Island	0.291132	2.31648e-18
cg23660154	chr1	110626540				TRUE	Island	0.263738	2.22086e-19
cg04792863	chr1	110627197				TRUE	Island	0.209104	4.0742e-16
cg24939845	chr1	110627473				TRUE	Island	0.231661	3.9565e-14
cg27432826	chr1	110672769			TRUE	TRUE	N_Shore	0.282623	2.54771e-26
cg02103924	chr1	110672857			TRUE	TRUE	Island	0.207085	1.72926e-15
cg25207248	chr1	110672912			TRUE	TRUE	Island	0.215497	3.5679e-20
cg01016662	chr1	110673082			TRUE	TRUE	Island	0.439968	1.03627e-25
cg09819083	chr1	110673179			TRUE	TRUE	Island	0.21433	5.95125e-19
cg04043150	chr1	110673319			TRUE		Island	0.207342	1.16351e-20
cg01791587	chr1	110693985	SLC6A17	5'UTR	TRUE	TRUE	Island	0.289587	5.70236e-21
cg13469595	chr1	111813852			TRUE		Island	0.200023	4.84302e-21
cg11574975	chr1	112058304	ADORA3	Body	TRUE	TRUE	Island	0.272651	5.53178e-23
cg07314829	chr1	112058397	ADORA3	Body	TRUE	TRUE	Island	0.203865	5.19256e-22
cg14669379	chr1	112058559	ADORA3	Body	TRUE	TRUE	Island	0.320679	4.32889e-22
cg07005055	chr1	113052167	WNT2B	Body		TRUE	Island	0.312209	1.90731e-17
cg07023459	chr1	113265410	FAM19A3	Body	TRUE	TRUE	N_Shore	0.24072	6.26445e-22
cg21286782	chr1	113265602	FAM19A3	Body	TRUE	TRUE	Island	0.256185	2.138e-22
cg10806711	chr1	113265679	FAM19A3	Body	TRUE		Island	0.202445	2.14378e-23
cg22865470	chr1	113286757			TRUE	TRUE	Island	0.217427	2.00128e-17
cg12549600	chr1	113287034			TRUE	TRUE	Island	0.234607	5.25188e-18
cg11518509	chr1	114525428			TRUE	TRUE	OpenSea	0.257006	2.12522e-23
cg00764109	chr1	114697582	SYT6	TSS1500			S_Shore	0.243409	1.31805e-17
cg10440578	chr1	115397857	SYCP1	5'UTR			Island	0.205142	2.88253e-16
cg26156256	chr1	116370891				TRUE	Island	0.26258	7.69976e-15
cg24660670	chr1	116371083			TRUE	TRUE	Island	0.210785	6.29357e-17
cg15654259	chr1	116371187			TRUE	TRUE	Island	0.226724	5.04379e-15
cg24106636	chr1	116381475	NHLH2	5'UTR	TRUE	TRUE	Island	0.275116	1.35524e-15
cg21646199	chr1	116381654	NHLH2	5'UTR	TRUE	TRUE	Island	0.204565	2.31203e-14
cg27527108	chr1	116711075			TRUE	TRUE	Island	0.255791	3.11111e-16
cg17933722	chr1	116711077			TRUE	TRUE	Island	0.327247	1.62968e-17
cg01824919	chr1	116711339			TRUE	TRUE	S_Shore	0.201717	5.46725e-16
cg16990168	chr1	119526060	TBX15	5'UTR			N_Shore	0.213044	1.42548e-15
cg02829688	chr1	119527008	TBX15	5'UTR		TRUE	Island	0.202763	1.70008e-16
cg21647227	chr1	119527111	TBX15	5'UTR		TRUE	Island	0.244836	1.13984e-20
cg13080379	chr1	119527156	TBX15	5'UTR		TRUE	Island	0.20294	1.52582e-20
cg07820868	chr1	119528638	TBX15	5'UTR			N_Shore	0.219515	3.13711e-23
cg02177231	chr1	119529930	TBX15	5'UTR	TRUE		Island	0.281667	2.69458e-17
cg10703826	chr1	119532116	TBX15	1stExon	TRUE		Island	0.234503	7.29337e-19
cg17326555	chr1	119535693			TRUE		Island	0.225816	2.8745e-18
cg24035245	chr1	119535928					Island	0.254384	2.20145e-22
cg17436134	chr1	119536288					S_Shore	0.218689	4.72679e-16
cg25386234	chr1	119542159			TRUE		N_Shore	0.210423	2.11912e-19
cg12659883	chr1	119543057					Island	0.244789	1.52797e-20
cg02063759	chr1	119543295					Island	0.259576	5.86859e-19
cg03216846	chr1	119543883			TRUE		Island	0.263365	2.60745e-17
cg20247486	chr1	119544329				TRUE	Island	0.245369	1.99706e-19
cg06764239	chr1	119544772				TRUE	S_Shore	0.219598	3.56722e-16
cg01959730	chr1	119548825					N_Shore	0.319537	5.56396e-20
cg09232478	chr1	119548852					N_Shore	0.220242	3.30251e-18
cg10572355	chr1	119549145					Island	0.209804	9.67912e-17
cg13933734	chr1	119550484					Island	0.206046	6.82449e-16
cg22230604	chr1	119870287					Island	0.309997	6.21482e-18
cg23609985	chr1	119870339					Island	0.276114	3.34863e-20
cg04784699	chr1	119870478					Island	0.265932	4.36044e-23
cg19624849	chr1	145415412	HFE2	5'UTR	TRUE		Island	0.301804	2.96476e-16
cg14036143	chr1	145415441	HFE2	5'UTR	TRUE		Island	0.234169	3.33852e-15
cg01000615	chr1	145562817	ANKRD35	Body	TRUE		OpenSea	0.225526	2.08262e-21
cg23019889	chr1	146544044					Island	0.227084	1.17699e-18
cg10124710	chr1	146544267					Island	0.27624	4.46813e-19
cg16237891	chr1	146544645					S_Shore	0.261228	1.71477e-18
cg03526459	chr1	146549940					Island	0.246262	3.69557e-18
cg02487331	chr1	146550467					Island	0.21338	4.75611e-17
cg20449590	chr1	146551201					Island	0.37521	7.23244e-20
cg06871074	chr1	146551565					Island	0.212799	1.20399e-19
cg21908235	chr1	146551744					Island	0.306291	1.49791e-22
cg16700924	chr1	146552102					N_Shore	0.241399	2.87476e-18
cg00044796	chr1	146552390					Island	0.235068	1.66673e-17
cg16409339	chr1	146556239					N_Shore	0.230873	2.53009e-15
cg16277128	chr1	146556479					Island	0.297229	1.38629e-16
cg00693978	chr1	146556675					Island	0.204021	1.15375e-18
cg25200152	chr1	147790458					S_Shore	0.263893	3.34098e-20
cg13502125	chr1	147826191					Island	0.213934	6.77907e-17
cg15067806	chr1	149146748					N_Shore	0.237694	3.18891e-14
cg20300343	chr1	149719461					Island	0.273379	1.03983e-17
cg01705587	chr1	149889364	SV2A	5'UTR			OpenSea	0.218795	1.37504e-21
cg20785674	chr1	150123490	PLEKHO1	Body			S_Shore	0.23308	2.35704e-20
cg26574003	chr1	150186289			TRUE		S_Shore	0.26528	7.6779e-17
cg03763518	chr1	150245044	C1orf54	TSS200			S_Shelf	0.200431	1.98583e-20
cg07119434	chr1	151103642				TRUE	N_Shore	0.239407	3.12188e-19
cg26331172	chr1	151118299	SEMA6C	5'UTR			Island	0.290274	4.645e-23
cg13331550	chr1	151118416	SEMA6C	5'UTR			Island	0.282654	1.07095e-19
cg25199322	chr1	151693838	C1orf230	TSS200	TRUE	TRUE	N_Shore	0.251803	1.67877e-20
cg11690979	chr1	151694320	C1orf230	Body		TRUE	S_Shore	0.250205	1.10469e-22
cg10959711	chr1	153509096	S100A6	TSS1500			S_Shore	0.207859	2.56451e-24
cg23499956	chr1	153584920	S100A16	5'UTR			OpenSea	0.218255	5.94793e-21
cg13740187	chr1	154164699	TPM3	TSS200	TRUE		OpenSea	0.200795	3.43701e-20
cg10445911	chr1	154971922					Island	0.236149	2.9456e-14
cg15627710	chr1	154972140					Island	0.225638	2.45447e-17
cg05778494	chr1	155165346					S_Shore	0.201532	1.58037e-17
cg08170787	chr1	155290535	RUSC1	TSS200		TRUE	N_Shore	0.209294	1.48022e-17
cg08574629	chr1	155290542	RUSC1	TSS200			N_Shore	0.216673	2.6031e-18
cg22877509	chr1	155290607	RUSC1	TSS200		TRUE	Island	0.238027	5.46279e-21
cg19516515	chr1	155290614	RUSC1	TSS200		TRUE	Island	0.223981	2.0629e-21
cg24006126	chr1	155290813	RUSC1	5'UTR		TRUE	Island	0.22766	7.80317e-17
cg12065285	chr1	155946346	ARHGEF2	Body		TRUE	N_Shore	0.258848	1.51459e-22
cg18276016	chr1	156076340					OpenSea	0.278499	1.72702e-18
cg24674445	chr1	156076363					OpenSea	0.269411	7.23027e-16
cg23274561	chr1	156084271	LMNA	TSS200			N_Shore	0.213647	1.59321e-24
cg08881019	chr1	156096178	LMNA	Body		TRUE	OpenSea	0.219573	7.20823e-24
cg21996227	chr1	156130826	SEMA4A	Body	TRUE	TRUE	OpenSea	0.200078	8.00803e-19
cg12062819	chr1	156358231				TRUE	Island	0.276916	1.0294e-14
cg23842796	chr1	156358404				TRUE	S_Shore	0.250687	9.69786e-15
cg20433275	chr1	156358408				TRUE	S_Shore	0.303129	7.62412e-15
cg09938227	chr1	156390124	C1orf61	5'UTR			N_Shore	0.256707	8.69699e-20
cg20582655	chr1	156390237	MIR9-1	TSS200			N_Shore	0.225904	7.42413e-18
cg26371731	chr1	156390240	MIR9-1	TSS200			N_Shore	0.304103	1.53366e-20
cg23217622	chr1	156405438			TRUE	TRUE	Island	0.248159	1.66926e-17
cg15820574	chr1	156406711				TRUE	S_Shore	0.203933	2.34604e-18
cg06355129	chr1	156646293	NES	1stExon			Island	0.21756	1.76138e-16
cg18793215	chr1	156674685	CRABP2	Body	TRUE	TRUE	N_Shore	0.209805	2.96227e-21
cg17165580	chr1	156676581	CRABP2	TSS1500	TRUE	TRUE	Island	0.243698	1.92224e-16
cg02363950	chr1	156676793	CRABP2	TSS1500	TRUE	TRUE	S_Shore	0.204755	3.9163e-21
cg12124922	chr1	158150649	CD1D	5'UTR	TRUE		Island	0.216959	2.32786e-16
cg25683325	chr1	158151058	CD1D	Body			Island	0.22683	1.55247e-16
cg15549973	chr1	159823687	C1orf204	Body			N_Shore	0.201481	3.35922e-20
cg10400707	chr1	160369840	VANGL2	TSS1500		TRUE	N_Shore	0.209263	5.29511e-19
cg14710465	chr1	160369869	VANGL2	TSS1500		TRUE	N_Shore	0.212984	3.49522e-21
cg24367957	chr1	161931993			TRUE	TRUE	OpenSea	0.230756	1.80598e-21
cg04510153	chr1	162660951	DDR2	5'UTR	TRUE		OpenSea	0.230338	3.14389e-24
cg17133668	chr1	162792177			TRUE		Island	0.218711	4.47865e-15
cg05341781	chr1	164723567	PBX1	Body	TRUE		OpenSea	0.218416	6.75961e-23
cg07135032	chr1	165322099	LMX1A	Body			Island	0.228797	1.21885e-18
cg22629111	chr1	166135208	FAM78B	Body		TRUE	Island	0.202325	4.35368e-19
cg04138112	chr1	167090618	DUSP27	Body			Island	0.276631	5.37994e-18
cg13958426	chr1	169396637	C1orf114	1stExon	TRUE		Island	0.330612	8.87566e-21
cg00002719	chr1	169396706	C1orf114	TSS200	TRUE		Island	0.428788	4.39601e-21
cg08104202	chr1	169396712	C1orf114	TSS200	TRUE		Island	0.391903	2.56621e-22
cg23818870	chr1	169396785	C1orf114	TSS200	TRUE		Island	0.310696	1.31906e-23
cg16998150	chr1	169396834	C1orf114	TSS200	TRUE		Island	0.304557	3.12954e-22
cg08047907	chr1	169396858	C1orf114	TSS200	TRUE		Island	0.360704	6.58717e-21
cg24808280	chr1	169396868	C1orf114	TSS200	TRUE		Island	0.338004	1.48274e-20
cg14826711	chr1	169396909	C1orf114	TSS1500	TRUE		S_Shore	0.273629	9.68074e-21
cg16136262	chr1	169429604			TRUE		OpenSea	0.275016	1.3146e-25
cg25464921	chr1	169429698			TRUE		OpenSea	0.306611	4.15731e-26
cg23089825	chr1	170630558				TRUE	Island	0.203477	2.52763e-15
cg07149609	chr1	170630734				TRUE	Island	0.237359	1.32108e-17
cg06267617	chr1	172291727	DNM3	Body	TRUE		OpenSea	0.202148	2.57482e-20
cg09183124	chr1	173092323			TRUE	TRUE	OpenSea	0.266719	5.11185e-25
cg16517394	chr1	173176362	TNFSF4	5'UTR			OpenSea	0.231072	8.93644e-23
cg26315984	chr1	173176501	TNFSF4	TSS200			OpenSea	0.216555	7.21061e-21
cg06372962	chr1	173638690	ANKRD45	5'UTR	TRUE		Island	0.210355	4.36398e-18
cg15883716	chr1	173638701	ANKRD45	5'UTR	TRUE		Island	0.232316	8.11292e-18
cg02958263	chr1	174769548	RABGAP1L	Body	TRUE		OpenSea	0.266458	2.94955e-21
cg17516247	chr1	174933574			TRUE		OpenSea	0.207776	8.09739e-22
cg22081371	chr1	177827903			TRUE		OpenSea	0.219428	4.20052e-15
cg26004771	chr1	178456093					Island	0.23276	3.48336e-16
cg08186924	chr1	179544721	NPHS2	Body			Island	0.257029	1.87408e-21
cg13931925	chr1	179545216	NPHS2	TSS200	TRUE		Island	0.280965	4.72306e-20
cg19016332	chr1	179545294	NPHS2	TSS1500	TRUE		Island	0.237072	1.07899e-20
cg09671258	chr1	180202530	LHX4	Body			Island	0.262302	2.39189e-16
cg18063017	chr1	180204974	LHX4	Body			Island	0.212214	1.06546e-20
cg12604950	chr1	180882287	KIAA1614	TSS200		TRUE	Island	0.212592	2.93832e-18
cg02156380	chr1	180882591	KIAA1614	Body		TRUE	Island	0.267162	3.77957e-25
cg06692785	chr1	180882681	KIAA1614	Body			S_Shore	0.267777	7.65696e-25
cg04276005	chr1	180895868	KIAA1614	Body	TRUE	TRUE	OpenSea	0.246659	1.33407e-22
cg19866866	chr1	182026044	ZNF648	Body			Island	0.261868	2.24877e-21
cg03982831	chr1	182669315					OpenSea	0.219451	7.08845e-20
cg02710296	chr1	182921851	C1orf14	Body			Island	0.24326	1.72715e-14
cg25837803	chr1	186649909	PTGS2	TSS1500		TRUE	Island	0.274451	2.2698e-15
cg16101346	chr1	186650479	PTGS2	TSS1500			S_Shore	0.220719	6.53273e-16
cg12725760	chr1	192873912					OpenSea	0.24268	7.64576e-21
cg06371502	chr1	197879766			TRUE		N_Shore	0.257301	3.48409e-17
cg25212090	chr1	197882170	LHX9	Body			S_Shore	0.207024	3.43575e-18
cg15544654	chr1	197882295	LHX9	Body			S_Shore	0.237658	5.95712e-16
cg16353006	chr1	197882469	LHX9	Body			S_Shore	0.263974	5.19503e-18
cg08883223	chr1	197888880	LHX9	Body			N_Shore	0.239506	7.79101e-16
cg15198094	chr1	200003342	NR5A2	Body	TRUE		N_Shore	0.225556	1.2644e-22
cg10513702	chr1	200003800	NR5A2	Body			N_Shore	0.294379	4.27086e-26
cg23258678	chr1	200004095	NR5A2	Body	TRUE	TRUE	N_Shore	0.342242	4.46719e-23
cg15062377	chr1	200004205	NR5A2	Body	TRUE	TRUE	N_Shore	0.294774	2.94939e-27
cg16046444	chr1	200004265	NR5A2	Body	TRUE	TRUE	N_Shore	0.224936	1.20132e-15
cg16103959	chr1	200004529	NR5A2	Body	TRUE		Island	0.262844	8.74124e-23
cg01941755	chr1	200004582	NR5A2	Body	TRUE		Island	0.21614	2.05678e-19
cg02779944	chr1	200004584	NR5A2	Body	TRUE		Island	0.24974	2.85455e-21
cg15130541	chr1	200004637	NR5A2	Body	TRUE		Island	0.212891	1.81963e-20
cg12730323	chr1	200004757	NR5A2	Body	TRUE		Island	0.238712	6.61748e-21
cg07208853	chr1	200005219	NR5A2	Body			S_Shore	0.258809	5.12491e-21
cg24553673	chr1	200005453	NR5A2	Body			S_Shore	0.208618	2.68114e-17
cg07926895	chr1	200005833	NR5A2	Body	TRUE		S_Shore	0.206842	2.92184e-21
cg10972873	chr1	200007592	NR5A2	Body			N_Shore	0.276216	1.07549e-25
cg16993043	chr1	200008026	NR5A2	Body		TRUE	N_Shore	0.321266	2.5885e-18
cg04097639	chr1	200009830	NR5A2	Body		TRUE	Island	0.267952	2.86951e-16
cg03257172	chr1	200010283	NR5A2	Body		TRUE	N_Shore	0.261926	2.80823e-17
cg04025964	chr1	200010788	NR5A2	Body			Island	0.303451	3.55577e-18
cg02773945	chr1	200011858	NR5A2	Body			Island	0.216601	1.42022e-15
cg22810423	chr1	200272180					S_Shore	0.204813	8.15445e-19
cg13300273	chr1	200842890	GPR25	1stExon	TRUE		Island	0.297926	6.81108e-19
cg21422700	chr1	201229247			TRUE	TRUE	OpenSea	0.278702	4.2385e-25
cg04223671	chr1	201509316				TRUE	Island	0.405565	1.88329e-22
cg04121938	chr1	201509415				TRUE	S_Shore	0.221526	5.03291e-25
cg10574566	chr1	203377808			TRUE	TRUE	OpenSea	0.230324	3.93008e-25
cg27173151	chr1	203598330	ATP2B4	5'UTR	TRUE		N_Shore	0.212526	1.04329e-17
cg26253438	chr1	203598623	ATP2B4	5'UTR	TRUE		Island	0.231877	2.06942e-14
cg02457623	chr1	203599089	ATP2B4	5'UTR			S_Shore	0.255425	9.20744e-19
cg07026666	chr1	204050380	SOX13	5'UTR	TRUE		OpenSea	0.201633	5.17609e-21
cg12638737	chr1	204120607	ETNK2	Body			Island	0.253145	2.22849e-20
cg02990368	chr1	204120649	ETNK2	Body			Island	0.25468	3.26601e-23
cg27549944	chr1	204328843	PLEKHA6	5'UTR			OpenSea	0.205782	1.96889e-22
cg09085216	chr1	204329081	PLEKHA6	TSS200			OpenSea	0.234944	4.35484e-22
cg04705659	chr1	204329107	PLEKHA6	TSS200		TRUE	OpenSea	0.21249	1.86212e-20
cg24864241	chr1	204329158	PLEKHA6	TSS200		TRUE	OpenSea	0.273908	2.50102e-23
cg21581873	chr1	204329307	PLEKHA6	TSS1500		TRUE	OpenSea	0.20169	1.62622e-22
cg08159989	chr1	205326071	KLHDC8A	TSS200			OpenSea	0.241867	1.83653e-14
cg07429623	chr1	205326201	KLHDC8A	TSS200			OpenSea	0.237405	1.32608e-21
cg03585778	chr1	205537837	MFSD4	TSS1500			Island	0.255248	1.20615e-15
cg18328206	chr1	206681378	RASSF5	1stExon	TRUE	TRUE	Island	0.244086	1.33987e-16
cg22356428	chr1	206687071	RASSF5	Body	TRUE	TRUE	OpenSea	0.212115	7.17998e-22
cg03990033	chr1	208084030	CD34	Body			N_Shore	0.20501	2.17073e-18
cg16291276	chr1	208084071	CD34	Body			N_Shore	0.239673	6.04608e-19
cg19591881	chr1	208084640	CD34	5'UTR			S_Shore	0.223417	1.7331e-18
cg13298199	chr1	208132388				TRUE	Island	0.271714	4.47641e-19
cg00901051	chr1	208132490					Island	0.269188	2.2073e-16
cg10236452	chr1	208132590				TRUE	Island	0.265576	7.80829e-15
cg07097417	chr1	212002770	LPGAT1	5'UTR		TRUE	N_Shore	0.21952	4.58309e-23
cg07569918	chr1	212002970	LPGAT1	5'UTR		TRUE	N_Shore	0.232359	1.17772e-20
cg24511404	chr1	212607111	NENF	Body			S_Shore	0.225675	2.88534e-24
cg15130102	chr1	213090116					OpenSea	0.22244	2.65685e-21
cg04607844	chr1	213090203					OpenSea	0.257131	5.16568e-21
cg12596505	chr1	213090240					OpenSea	0.211192	2.59803e-22
cg26926612	chr1	214153294					Island	0.226428	1.20865e-15
cg07029873	chr1	217311014	ESRRG	1stExon			Island	0.252617	9.00817e-19
cg06634716	chr1	217311151	ESRRG	TSS200			Island	0.238466	2.4808e-20
cg21784383	chr1	217311172	ESRRG	TSS200			Island	0.269649	3.47712e-20
cg00913949	chr1	217311511	ESRRG	TSS1500			Island	0.228576	2.20592e-16
cg25755575	chr1	217311531	ESRRG	TSS1500			Island	0.236592	9.02949e-18
cg22118524	chr1	217311547	ESRRG	TSS1500			Island	0.203155	2.64152e-16
cg17164063	chr1	218330093			TRUE		OpenSea	0.236589	1.23821e-17
cg10484211	chr1	218547935	TGFB2	Body	TRUE		OpenSea	0.203263	4.35142e-20
cg03224396	chr1	221017300			TRUE		OpenSea	0.215215	1.61269e-18
cg03536711	chr1	221509067	LOC400804	Body	TRUE		OpenSea	0.219661	1.48426e-19
cg08892600	chr1	223538601	SUSD4	TSS1500			Island	0.234407	6.96661e-21
cg10502231	chr1	224363449				TRUE	OpenSea	0.258127	3.83317e-20
cg17239057	chr1	224363575				TRUE	OpenSea	0.247528	2.68014e-22
cg22444124	chr1	226867960	ITPKB	Body	TRUE	TRUE	OpenSea	0.26594	1.87363e-18
cg14789818	chr1	227748712					Island	0.251572	2.94818e-20
cg20699586	chr1	227748719					Island	0.267007	2.65117e-19
cg10962762	chr1	228075749					Island	0.204451	1.25656e-14
cg09316122	chr1	228195522	WNT3A	Body			Island	0.211723	2.36779e-14
cg24848599	chr1	228604800	TRIM17	TSS1500	TRUE	TRUE	S_Shore	0.212123	3.38146e-18
cg25874119	chr1	228633904			TRUE		Island	0.239534	6.9746e-22
cg00655913	chr1	228633920			TRUE	TRUE	Island	0.306016	3.19172e-21
cg25622154	chr1	228657536					Island	0.218751	1.0987e-17
cg06585233	chr1	229543009					Island	0.214482	1.29036e-17
cg03940848	chr1	229543112					Island	0.27894	1.11144e-17
cg08855395	chr1	231296818					Island	0.226615	5.13074e-20
cg11192416	chr1	231296968					Island	0.207986	3.99842e-17
cg14009098	chr1	234041306	SLC35F3	Body			Island	0.248113	1.93971e-18
cg13420364	chr1	234857659			TRUE		OpenSea	0.227203	5.33978e-22
cg18792146	chr1	235105751			TRUE		OpenSea	0.250722	1.00545e-18
cg24716879	chr1	235105872			TRUE		OpenSea	0.253034	2.34806e-20
cg00040837	chr1	236081097			TRUE	TRUE	OpenSea	0.209453	1.25864e-18
cg18879590	chr1	236306640	GPR137B	Body		TRUE	Island	0.224407	4.43043e-16
cg15031661	chr1	240256603	FMN2	1stExon		TRUE	Island	0.24247	3.56099e-17
cg18181201	chr1	242686709	PLD5	5'UTR			N_Shore	0.204368	1.34817e-15
cg16126286	chr1	243646235	SDCCAG8	Body	TRUE	TRUE	N_Shore	0.241272	3.23718e-16
cg00705059	chr1	244080368			TRUE		N_Shore	0.211828	8.83883e-15
cg20678442	chr1	244893503			TRUE	TRUE	Island	0.354069	8.88646e-19
cg15176829	chr1	246952215	LOC149134	TSS1500	TRUE		Island	0.25304	1.02101e-22
cg03596016	chr1	246952362	LOC149134	TSS1500	TRUE		Island	0.420992	5.19352e-21
cg08535928	chr1	246952495	LOC149134	TSS1500	TRUE		Island	0.268949	5.79807e-21
cg03340119	chr1	246952508	LOC149134	TSS1500	TRUE		Island	0.258789	3.67049e-23
cg26276327	chr1	247511469					OpenSea	0.225133	4.37867e-19
cg25065716	chr10	1422865	ADARB2	Body	TRUE		OpenSea	0.204647	5.16964e-18
cg17861863	chr10	1454387	ADARB2	Body			OpenSea	0.307732	1.10953e-16
cg14824052	chr10	2951326					OpenSea	0.20419	4.95301e-19
cg06188744	chr10	3108651	PFKP	TSS1500			Island	0.26454	2.91685e-19
cg23782734	chr10	3109041	PFKP	TSS1500			Island	0.275361	3.988e-24
cg07198194	chr10	3109053	PFKP	TSS1500			Island	0.330816	3.45984e-20
cg03917666	chr10	3977608			TRUE	TRUE	OpenSea	0.220119	6.50039e-26
cg12506775	chr10	5734571	C10orf18	5'UTR	TRUE		OpenSea	0.262236	1.03016e-23
cg01476568	chr10	5734716	C10orf18	5'UTR	TRUE		OpenSea	0.283924	3.88158e-20
cg10119075	chr10	7709738	ITIH5	TSS1500			OpenSea	0.328355	3.59337e-25
cg09445472	chr10	7709962	ITIH5	TSS1500			OpenSea	0.26048	4.8226e-19
cg10008757	chr10	8097183	GATA3	5'UTR			Island	0.207102	7.37936e-16
cg14327531	chr10	8097331	GATA3	5'UTR			Island	0.261503	6.86906e-18
cg13409449	chr10	8097354	GATA3	5'UTR			Island	0.307358	7.48436e-17
cg15267232	chr10	8097689	GATA3	Body			Island	0.325161	1.16464e-23
cg04249706	chr10	11206772	CUGBP2	Body		TRUE	N_Shore	0.294319	8.25138e-18
cg25761326	chr10	11206792	CUGBP2	TSS200		TRUE	N_Shore	0.226842	3.57526e-19
cg11482422	chr10	11206813	CUGBP2	TSS200		TRUE	N_Shore	0.224447	1.84511e-18
cg17775621	chr10	11206838	CUGBP2	TSS200		TRUE	N_Shore	0.208566	4.05897e-18
cg26150462	chr10	11206868	CUGBP2	TSS200		TRUE	N_Shore	0.252227	5.13404e-21
cg12178980	chr10	11206870	CUGBP2	TSS200		TRUE	N_Shore	0.2999	1.12471e-20
cg22738219	chr10	13043313	CCDC3	1stExon		TRUE	Island	0.278724	8.80371e-15
cg22750254	chr10	13043421	CCDC3	1stExon		TRUE	Island	0.204147	1.18091e-14
cg25032745	chr10	15481695			TRUE		OpenSea	0.220572	1.6129e-20
cg27177554	chr10	16562102	C1QL3	Body			Island	0.277084	1.10148e-18
cg02236650	chr10	17269775	VIM	TSS1500	TRUE		N_Shore	0.218961	7.10303e-19
cg20198108	chr10	17270091	VIM	TSS200		TRUE	N_Shore	0.201954	1.09274e-14
cg06460869	chr10	17270094	VIM	TSS200		TRUE	N_Shore	0.247135	3.7872e-14
cg05151811	chr10	17270250	VIM	TSS200		TRUE	N_Shore	0.209647	6.76598e-16
cg08918274	chr10	17270300	VIM	5'UTR		TRUE	N_Shore	0.233742	6.81524e-18
cg15115171	chr10	17604829			TRUE		OpenSea	0.222682	1.68727e-18
cg26803268	chr10	18549536	CACNB2	Body			OpenSea	0.275025	1.16224e-22
cg18959207	chr10	18549686	CACNB2	1stExon	TRUE		OpenSea	0.210354	9.91922e-24
cg02635932	chr10	18549778	CACNB2	1stExon	TRUE		OpenSea	0.261281	6.75297e-22
cg19998294	chr10	18629497	CACNB2	Body			OpenSea	0.22153	4.25859e-19
cg05719612	chr10	18629545	CACNB2	Body			OpenSea	0.218752	2.373e-19
cg03103919	chr10	18629674	CACNB2	Body			OpenSea	0.203453	2.30738e-16
cg15169374	chr10	18629677	CACNB2	Body			OpenSea	0.205821	2.56649e-17
cg12733607	chr10	21813501	C10orf140	5'UTR			N_Shore	0.287575	1.15295e-26
cg03891590	chr10	21814313	C10orf140	5'UTR			N_Shore	0.2277	2.49046e-25
cg26492368	chr10	22634733	SPAG6	Body			Island	0.228339	9.36266e-16
cg07355157	chr10	23385780	MSRB2	Body	TRUE		S_Shore	0.204723	2.8068e-22
cg09403666	chr10	23461493					Island	0.222038	5.03031e-16
cg14568830	chr10	23463243					Island	0.215409	5.03712e-18
cg06550984	chr10	23480002	PTF1A	TSS1500			N_Shore	0.201055	8.993e-20
cg16366546	chr10	24672795	KIAA1217	Body	TRUE		OpenSea	0.203953	8.0423e-19
cg26249873	chr10	25465430	LOC100128811	TSS1500			Island	0.201822	4.18144e-24
cg08441170	chr10	26223100	MYO3A	1stExon			Island	0.207544	2.66669e-15
cg23771603	chr10	26223310	MYO3A	5'UTR			Island	0.214749	5.19972e-15
cg09084462	chr10	27220234	NCRNA00202	Body			OpenSea	0.239703	6.41874e-22
cg14776321	chr10	27220441	NCRNA00202	Body			OpenSea	0.242657	5.27711e-21
cg02161900	chr10	28035631	MKX	TSS1500			S_Shore	0.211884	1.92952e-20
cg02249292	chr10	28035655	MKX	TSS1500			S_Shore	0.20988	1.20301e-19
cg17918002	chr10	28035719	MKX	TSS1500			S_Shore	0.223088	3.95111e-23
cg08815081	chr10	28035731	MKX	TSS1500			S_Shore	0.215743	2.76534e-24
cg27303223	chr10	28035822	MKX	TSS1500			S_Shore	0.208728	3.71341e-17
cg05485137	chr10	28035864	MKX	TSS1500			S_Shore	0.241731	1.41844e-20
cg07964848	chr10	28035894	MKX	TSS1500			S_Shore	0.248902	1.84552e-19
cg14947429	chr10	28036151	MKX	TSS1500			S_Shore	0.27102	1.14145e-20
cg10198294	chr10	28616726			TRUE		OpenSea	0.215089	7.92878e-22
cg06197966	chr10	29948324	SVIL	5'UTR		TRUE	OpenSea	0.216467	1.79655e-19
cg27268352	chr10	30387860			TRUE		OpenSea	0.241498	5.64725e-22
cg02059509	chr10	30405144					OpenSea	0.205273	9.46823e-21
cg26579601	chr10	30724020	MAP3K8	5'UTR			S_Shore	0.259977	1.61944e-21
cg19596273	chr10	30724086	MAP3K8	5'UTR			S_Shore	0.242738	2.54809e-22
cg14847502	chr10	30724194	MAP3K8	5'UTR			S_Shore	0.212757	2.25211e-23
cg25680628	chr10	30724274	MAP3K8	5'UTR			S_Shore	0.292326	6.64678e-24
cg26647332	chr10	31073467					N_Shore	0.289882	7.9137e-17
cg11944757	chr10	31422942			TRUE	TRUE	Island	0.221328	2.02872e-15
cg11147278	chr10	34062234			TRUE		OpenSea	0.206218	2.30896e-14
cg13853894	chr10	34393934			TRUE		OpenSea	0.227238	2.90271e-23
cg03171770	chr10	43393728					Island	0.234719	3.26262e-18
cg11986813	chr10	43429144					Island	0.415681	4.42311e-19
cg17053251	chr10	43429459					Island	0.308485	1.93154e-19
cg07825347	chr10	43600497	RET	Body	TRUE		Island	0.240302	3.17019e-20
cg07638650	chr10	43697849	RASGEF1A	Body	TRUE	TRUE	Island	0.280816	1.80585e-24
cg23136139	chr10	43697918	RASGEF1A	Body	TRUE	TRUE	Island	0.244034	1.68308e-22
cg02636041	chr10	43698008	RASGEF1A	Body	TRUE	TRUE	Island	0.445815	4.30851e-22
cg12451631	chr10	43698141	RASGEF1A	Body	TRUE	TRUE	Island	0.545865	1.5105e-19
cg01083633	chr10	44162781				TRUE	N_Shore	0.22001	2.69064e-18
cg25888561	chr10	44163067				TRUE	Island	0.395826	1.45192e-19
cg27608999	chr10	45914276	ALOX5	Body		TRUE	N_Shore	0.318996	8.63842e-28
cg04194494	chr10	45914450	ALOX5	Body		TRUE	Island	0.360668	1.19739e-27
cg21981270	chr10	45914525	ALOX5	Body			Island	0.391388	1.11517e-26
cg16831085	chr10	45914645	ALOX5	Body	TRUE	TRUE	Island	0.35259	4.91544e-21
cg10069493	chr10	45914688	ALOX5	Body	TRUE	TRUE	Island	0.261368	2.38041e-24
cg00675569	chr10	45914840	ALOX5	Body	TRUE	TRUE	Island	0.331677	3.77869e-22
cg09806262	chr10	45914949	ALOX5	Body	TRUE	TRUE	S_Shore	0.254025	1.06726e-24
cg07355189	chr10	45923374	ALOX5	Body			Island	0.237323	5.65224e-16
cg09197112	chr10	46992448	GPRIN2	TSS1500	TRUE	TRUE	Island	0.247082	4.91497e-23
cg07041470	chr10	46993210	GPRIN2	TSS1500	TRUE	TRUE	Island	0.253133	9.20902e-24
cg13722700	chr10	46993502	GPRIN2	TSS200		TRUE	S_Shore	0.240663	3.79887e-17
cg04425920	chr10	50604518			TRUE		Island	0.271399	1.65617e-18
cg12052765	chr10	50816963	SLC18A3	TSS1500			N_Shore	0.219381	6.58016e-17
cg14156751	chr10	50976571			TRUE		Island	0.213514	4.76823e-19
cg05184377	chr10	50976646			TRUE		Island	0.217493	8.02153e-17
cg08739651	chr10	51784888					S_Shore	0.232902	7.81665e-22
cg23194719	chr10	52177823	SGMS1	5'UTR		TRUE	Island	0.267733	1.97921e-21
cg25575732	chr10	52177880	SGMS1	5'UTR		TRUE	Island	0.214149	1.78422e-21
cg05977109	chr10	52178181	SGMS1	5'UTR		TRUE	Island	0.251786	3.85107e-22
cg09425247	chr10	52178225	SGMS1	5'UTR		TRUE	S_Shore	0.288845	1.09304e-21
cg10298052	chr10	57391055				TRUE	Island	0.20731	5.76872e-16
cg09696939	chr10	60272079	BICC1	TSS1500		TRUE	N_Shore	0.386881	7.32617e-23
cg01316378	chr10	63629580			TRUE		OpenSea	0.203342	2.45891e-14
cg06767766	chr10	70321383	TET1	5'UTR		TRUE	S_Shore	0.230398	2.31533e-16
cg23350336	chr10	70321554	TET1	5'UTR		TRUE	S_Shore	0.328024	2.12225e-21
cg12630147	chr10	70321574	TET1	5'UTR		TRUE	S_Shore	0.342066	9.07264e-23
cg02774862	chr10	70321580	TET1	5'UTR		TRUE	S_Shore	0.356468	2.47751e-24
cg20326704	chr10	70321770	TET1	5'UTR		TRUE	S_Shore	0.232463	9.57492e-18
cg02378006	chr10	73026288	UNC5B	Body	TRUE	TRUE	OpenSea	0.211652	4.83536e-19
cg24331301	chr10	73156377	CDH23	TSS1500		TRUE	Island	0.320754	6.35173e-26
cg15323528	chr10	73156427	CDH23	TSS1500		TRUE	Island	0.302094	1.2461e-25
cg15763670	chr10	73473235	C10orf105	3'UTR	TRUE	TRUE	OpenSea	0.248244	2.03108e-24
cg19407453	chr10	73473423	C10orf105	3'UTR	TRUE	TRUE	OpenSea	0.202183	7.19162e-24
cg11863717	chr10	73725041	CHST3	5'UTR		TRUE	S_Shore	0.293683	4.78156e-27
cg19879075	chr10	73846858	SPOCK2	Body			Island	0.244725	1.59206e-17
cg21105787	chr10	73847257	SPOCK2	Body			Island	0.24045	1.1322e-24
cg01498231	chr10	73847259	SPOCK2	Body		TRUE	Island	0.201622	4.90216e-23
cg13997668	chr10	73847532	SPOCK2	Body		TRUE	Island	0.253208	8.3775e-16
cg09661010	chr10	73848153	SPOCK2	5'UTR	TRUE	TRUE	Island	0.231933	8.42169e-16
cg10983208	chr10	73848320	SPOCK2	5'UTR	TRUE	TRUE	S_Shore	0.208491	1.26916e-19
cg26435178	chr10	73848458	SPOCK2	5'UTR	TRUE	TRUE	S_Shore	0.205058	4.69762e-19
cg07904073	chr10	74017122					N_Shelf	0.247127	1.99643e-20
cg12799885	chr10	74020976					Island	0.326108	3.00692e-17
cg25104124	chr10	74021022					Island	0.240162	5.38387e-17
cg16716883	chr10	74079772				TRUE	Island	0.220238	4.43859e-17
cg17723653	chr10	75407823	SYNPO2L	Body	TRUE	TRUE	S_Shore	0.299018	6.49518e-23
cg12317414	chr10	75407991	SYNPO2L	Body	TRUE		S_Shore	0.315577	4.08813e-23
cg19714985	chr10	77043608			TRUE		OpenSea	0.293368	1.90553e-25
cg23024158	chr10	78011952	C10orf11	Body	TRUE		OpenSea	0.210041	1.29894e-21
cg19008877	chr10	78157854	C10orf11	Body	TRUE		OpenSea	0.217608	9.47968e-24
cg16055185	chr10	79150517	KCNMA1	Body	TRUE		OpenSea	0.213148	1.50161e-22
cg01858517	chr10	79396584	KCNMA1	Body			Island	0.2485	9.68609e-17
cg27586487	chr10	79687289	LOC100128292	Body			S_Shore	0.218019	1.97531e-19
cg16680677	chr10	80008481			TRUE		OpenSea	0.240638	6.2841e-20
cg22609785	chr10	80416672					OpenSea	0.204909	1.85497e-20
cg25034155	chr10	80945359	ZMIZ1	5'UTR	TRUE		OpenSea	0.229783	1.58205e-20
cg20744163	chr10	80999841	ZMIZ1	Body	TRUE	TRUE	N_Shelf	0.25186	9.37849e-20
cg26654807	chr10	81002218	ZMIZ1	Body	TRUE		Island	0.21744	1.35435e-14
cg17853216	chr10	81002480	ZMIZ1	Body			Island	0.25705	9.2758e-15
cg02283485	chr10	81003020	ZMIZ1	Body			Island	0.207164	4.13199e-16
cg20543544	chr10	81003657	ZMIZ1	Body			Island	0.206019	7.02719e-17
cg22653140	chr10	81214225			TRUE	TRUE	OpenSea	0.257763	1.71566e-21
cg09614479	chr10	81967536				TRUE	S_Shore	0.200533	8.42868e-16
cg19423196	chr10	82049429	MAT1A	1stExon			OpenSea	0.217573	1.06871e-18
cg05869699	chr10	82258734	TSPAN14	Body	TRUE	TRUE	OpenSea	0.238865	9.91178e-21
cg17655415	chr10	89802559			TRUE		OpenSea	0.208896	4.26215e-18
cg24035164	chr10	93646991					N_Shore	0.272154	6.13148e-20
cg04192867	chr10	93647053					Island	0.246342	2.1194e-17
cg11750133	chr10	93647217					Island	0.224862	1.49411e-14
cg15732502	chr10	93647300					Island	0.307447	2.34598e-16
cg19116429	chr10	93647563					S_Shore	0.225482	4.12371e-16
cg18484034	chr10	93647648					S_Shore	0.240184	3.43035e-19
cg22579265	chr10	94180383			TRUE	TRUE	Island	0.317649	2.76401e-20
cg01297808	chr10	94180551			TRUE		Island	0.288626	4.03499e-22
cg19305681	chr10	94821657	CYP26C1	Body			Island	0.256646	7.30931e-18
cg00790395	chr10	94822172	CYP26C1	Body	TRUE		Island	0.277136	2.81304e-16
cg05127821	chr10	94822908	CYP26C1	Body	TRUE		Island	0.338424	3.56747e-22
cg22044002	chr10	94825547	CYP26C1	Body	TRUE		Island	0.23278	1.95446e-17
cg00714725	chr10	94825576	CYP26C1	Body	TRUE	TRUE	Island	0.322505	6.61993e-17
cg14375937	chr10	94825667	CYP26C1	Body		TRUE	Island	0.212319	1.85323e-14
cg17011709	chr10	94826053	CYP26C1	Body		TRUE	Island	0.212247	1.64297e-16
cg06857304	chr10	94826314	CYP26C1	Body			Island	0.223602	4.44794e-18
cg02466572	chr10	94826319	CYP26C1	Body			Island	0.286074	5.14778e-21
cg10556384	chr10	94828103	CYP26C1	Body		TRUE	Island	0.202877	3.06076e-14
cg18082515	chr10	95197126	MYOF	Body	TRUE	TRUE	OpenSea	0.207651	4.62371e-23
cg06154313	chr10	95360494	RBP4	Body	TRUE		Island	0.202173	1.20595e-16
cg06833709	chr10	95517498	LGI1	TSS200	TRUE		OpenSea	0.21312	3.03959e-17
cg07793207	chr10	95517529	LGI1	TSS200	TRUE		OpenSea	0.26372	2.60162e-21
cg13763783	chr10	95517562	LGI1	TSS200			OpenSea	0.26165	1.42252e-20
cg13261825	chr10	98939742	SLIT1	Body		TRUE	OpenSea	0.286749	7.54251e-23
cg27165884	chr10	99473085	MARVELD1	TSS1500			Island	0.207533	2.09413e-16
cg06679087	chr10	99473206	MARVELD1	TSS1500			Island	0.325346	2.73667e-15
cg06616710	chr10	99473224	MARVELD1	TSS1500			Island	0.253195	1.0237e-17
cg24500959	chr10	99474813	MARVELD1	Body			S_Shore	0.216116	6.34069e-15
cg22831607	chr10	99531797	SFRP5	TSS200		TRUE	Island	0.273406	1.04717e-16
cg07834955	chr10	99531879	SFRP5	TSS200		TRUE	Island	0.32448	2.74849e-20
cg04991805	chr10	99790910	CRTAC1	TSS1500			Island	0.24262	3.35216e-15
cg16674860	chr10	100206094	HPS1	5'UTR			OpenSea	0.241581	1.91113e-15
cg18499443	chr10	100993553	HPSE2	Body	TRUE		N_Shore	0.202022	1.37838e-19
cg08927006	chr10	100993556	HPSE2	Body	TRUE		N_Shore	0.216853	2.0764e-18
cg13737332	chr10	100993583	HPSE2	Body	TRUE		N_Shore	0.223092	6.68546e-18
cg17863743	chr10	100993587	HPSE2	Body	TRUE		N_Shore	0.264081	1.33861e-18
cg09511126	chr10	100993597	HPSE2	Body	TRUE		N_Shore	0.211499	1.49619e-20
cg10441934	chr10	100995640	HPSE2	TSS200			S_Shore	0.234101	9.28551e-21
cg03388193	chr10	100996070	HPSE2	TSS1500			S_Shore	0.229782	1.96551e-20
cg22891862	chr10	101279697					N_Shore	0.240861	2.45969e-19
cg23536629	chr10	101279944					Island	0.349393	6.9141e-22
cg15338327	chr10	101280209					Island	0.331036	5.29646e-24
cg24331598	chr10	101280256					Island	0.317315	1.1615e-22
cg01177167	chr10	101280523			TRUE		N_Shore	0.322627	9.12335e-21
cg26075184	chr10	101281703					Island	0.223954	3.3092e-16
cg02792168	chr10	101281924					Island	0.202851	8.27622e-17
cg01987516	chr10	101282726					Island	0.241146	4.1041e-19
cg23904955	chr10	101282759					Island	0.207815	5.92993e-19
cg11081894	chr10	101283847					S_Shore	0.222477	1.81728e-21
cg19103219	chr10	101287059			TRUE		N_Shore	0.210822	4.85746e-19
cg03036592	chr10	101287839					Island	0.20414	6.57859e-19
cg04972745	chr10	101287846					Island	0.259469	3.66042e-18
cg02798576	chr10	101290168					Island	0.272706	8.81409e-21
cg10377903	chr10	101290699					Island	0.283856	1.04296e-16
cg04190875	chr10	101291092					Island	0.233262	6.31751e-20
cg03711485	chr10	101296036	NKX2-3	3'UTR	TRUE		Island	0.244314	1.26122e-17
cg04669815	chr10	101296619				TRUE	Island	0.309135	1.74713e-20
cg24376776	chr10	101297245			TRUE	TRUE	Island	0.332207	3.19205e-23
cg23615741	chr10	101297642			TRUE	TRUE	Island	0.321138	3.68671e-18
cg18267049	chr10	101875028					Island	0.240528	1.82831e-20
cg03679755	chr10	101875035					Island	0.24316	7.08286e-19
cg00557947	chr10	102419245					Island	0.221128	1.45567e-16
cg00272971	chr10	102419564					Island	0.230313	2.39252e-18
cg03943218	chr10	102419600					Island	0.212538	1.18884e-15
cg07099331	chr10	102419617					Island	0.261694	9.57817e-18
cg26540559	chr10	102447443					OpenSea	0.245578	2.31416e-16
cg20100910	chr10	102475429					Island	0.228511	1.63303e-20
cg22964842	chr10	102495141					Island	0.317361	1.72042e-20
cg26596964	chr10	102495354					Island	0.328653	1.35726e-20
cg24686074	chr10	102497666				TRUE	Island	0.233242	2.93274e-14
cg08823110	chr10	102589840					N_Shore	0.224208	3.46544e-18
cg11697427	chr10	102590168					Island	0.235294	6.70322e-20
cg24146331	chr10	102590225					Island	0.204622	6.19395e-21
cg27454883	chr10	102626432			TRUE		OpenSea	0.224921	3.06103e-17
cg26582768	chr10	102792043	PDZD7	TSS1500			Island	0.233245	3.27439e-16
cg06154084	chr10	102792249	PDZD7	TSS1500			Island	0.280454	3.49649e-16
cg16448058	chr10	102880841	TLX1NB	5'UTR			N_Shelf	0.224527	3.11938e-15
cg20615879	chr10	102892391	TLX1NB	TSS1500	TRUE	TRUE	N_Shore	0.258808	2.95366e-18
cg00299972	chr10	102892528	TLX1	Body	TRUE	TRUE	N_Shore	0.227877	2.56566e-20
cg00741609	chr10	102893925	TLX1	Body	TRUE		Island	0.25796	1.51626e-19
cg12118269	chr10	102893980	TLX1	Body	TRUE		Island	0.346603	1.37768e-21
cg24812837	chr10	102894120	TLX1	Body	TRUE		Island	0.273156	1.45579e-19
cg25266629	chr10	102894148	TLX1	Body	TRUE		Island	0.274836	1.81016e-19
cg14861089	chr10	102895043	TLX1	Body			Island	0.394061	1.01825e-20
cg23340017	chr10	102895133	TLX1	Body			N_Shore	0.23175	1.22815e-18
cg27521476	chr10	102896376	TLX1	Body			Island	0.228879	6.25275e-21
cg01175020	chr10	102896475	TLX1	Body			Island	0.277348	2.13679e-22
cg06382559	chr10	102896640	TLX1	Body			Island	0.218103	2.49762e-22
cg14383658	chr10	102899262					Island	0.208736	1.72478e-18
cg05482942	chr10	102899285					Island	0.284669	1.35853e-18
cg02167020	chr10	102899949					Island	0.24366	8.00682e-19
cg10420161	chr10	102899983					Island	0.254707	1.82642e-19
cg14038391	chr10	102900130					Island	0.295182	1.50118e-22
cg17101450	chr10	102900365					S_Shore	0.335391	7.83102e-21
cg24570303	chr10	102900491					S_Shore	0.264086	3.79182e-19
cg08518631	chr10	102905681					N_Shore	0.375666	5.99554e-26
cg00961866	chr10	102905737					Island	0.314252	7.54187e-23
cg26701408	chr10	102906057					Island	0.30646	4.31672e-23
cg03404143	chr10	102986973	LBX1	3'UTR			Island	0.206294	4.33206e-15
cg12646649	chr10	102987257	LBX1	Body			Island	0.227073	1.40908e-18
cg26702958	chr10	102996254	FLJ41350	Body	TRUE	TRUE	Island	0.240562	8.73294e-19
cg06520675	chr10	102996310	FLJ41350	Body	TRUE	TRUE	Island	0.206096	6.01808e-20
cg02367696	chr10	102996464	FLJ41350	Body	TRUE	TRUE	Island	0.221415	5.54247e-21
cg03242698	chr10	102997382	FLJ41350	Body		TRUE	S_Shore	0.239061	1.65609e-18
cg01812599	chr10	103043991					Island	0.233535	6.10453e-18
cg19507206	chr10	103044008					Island	0.234801	7.22081e-17
cg09165441	chr10	103044194					Island	0.291018	5.90535e-17
cg08231870	chr10	103070372			TRUE		Island	0.264573	9.10698e-18
cg24472574	chr10	103070503			TRUE		Island	0.286002	1.74644e-17
cg25209842	chr10	103536342	FGF8	TSS1500			Island	0.271468	1.45581e-17
cg06169131	chr10	103536348	FGF8	TSS1500			Island	0.20978	1.36169e-18
cg03557857	chr10	103589693	KCNIP2	Body			N_Shore	0.232066	2.7832e-17
cg04554652	chr10	103880979	LDB1	TSS1500			S_Shore	0.235635	2.77599e-21
cg25170591	chr10	103881062	LDB1	TSS1500			S_Shore	0.243257	2.5881e-24
cg26412532	chr10	103881068	LDB1	TSS1500			S_Shore	0.2494	1.99491e-24
cg15444597	chr10	103881107	LDB1	TSS1500			S_Shore	0.246609	4.7099e-26
cg17915961	chr10	103881480	LDB1	TSS1500			S_Shore	0.240778	1.80842e-24
cg23095743	chr10	104000831	PITX3	5'UTR			Island	0.235377	9.21162e-17
cg06361405	chr10	104434010	ARL3	3'UTR		TRUE	OpenSea	0.329903	9.23681e-25
cg24435571	chr10	104436140	ARL3	3'UTR	TRUE	TRUE	OpenSea	0.202014	4.3567e-23
cg08772003	chr10	104629869	AS3MT	Body	TRUE	TRUE	S_Shore	0.23846	3.01505e-21
cg18673954	chr10	105036611	INA	TSS1500		TRUE	N_Shore	0.219372	5.08609e-15
cg23642747	chr10	105036645	INA	TSS1500		TRUE	Island	0.251884	2.40527e-15
cg10024587	chr10	105211753	CALHM2	5'UTR	TRUE		N_Shore	0.207239	1.52177e-23
cg19007269	chr10	105420501	SH3PXD2A	Body	TRUE		N_Shore	0.258037	4.56098e-24
cg23901918	chr10	105420747	SH3PXD2A	Body	TRUE		Island	0.28796	1.60716e-20
cg25552843	chr10	106088702	ITPRIP	5'UTR	TRUE		OpenSea	0.256095	6.85948e-22
cg19640166	chr10	106088711	ITPRIP	5'UTR	TRUE		OpenSea	0.297673	2.43539e-21
cg24621437	chr10	108924560	SORCS1	TSS1500		TRUE	Island	0.232608	3.75467e-17
cg16664405	chr10	111216962					Island	0.211087	6.32287e-16
cg03962527	chr10	111766879	ADD3	5'UTR			N_Shore	0.247535	4.51656e-23
cg05098590	chr10	111767379	ADD3	5'UTR			Island	0.399723	5.04123e-21
cg19214408	chr10	111981687	MXI1	Body	TRUE	TRUE	N_Shelf	0.284506	1.65577e-26
cg06346505	chr10	116164640	AFAP1L2	TSS200		TRUE	S_Shore	0.228859	3.94393e-16
cg04055345	chr10	116264862	ABLIM1	Body	TRUE		OpenSea	0.20268	9.16962e-20
cg19873536	chr10	116475283			TRUE		OpenSea	0.211621	2.10848e-20
cg19333507	chr10	116852186	ATRNL1	TSS1500		TRUE	N_Shore	0.204072	9.82751e-15
cg18425434	chr10	118429648	C10orf82	TSS200		TRUE	Island	0.246741	2.21732e-17
cg07621046	chr10	118429658	C10orf82	TSS200		TRUE	Island	0.227702	2.83461e-17
cg20628994	chr10	118429852	C10orf82	TSS1500		TRUE	Island	0.242169	3.71216e-14
cg26783057	chr10	118891670	VAX1	3'UTR			N_Shore	0.285626	2.48705e-15
cg05667348	chr10	118892581	VAX1	Body			Island	0.244045	5.94669e-19
cg03048654	chr10	118893138	VAX1	3'UTR			N_Shore	0.23181	2.29829e-16
cg25527090	chr10	118894180	VAX1	Body			Island	0.232264	7.77455e-19
cg13980799	chr10	119000215	SLC18A2	TSS1500			N_Shore	0.214436	1.26063e-19
cg00498305	chr10	119000236	SLC18A2	TSS1500			N_Shore	0.243753	1.13353e-20
cg17276590	chr10	119304487	EMX2OS	Body			Island	0.260237	1.06201e-16
cg05653707	chr10	119304938	EMX2	Body			Island	0.207698	1.08597e-15
cg19912142	chr10	119494671					Island	0.219177	3.29095e-18
cg24902339	chr10	119867927	CASC2	Body			OpenSea	0.21914	9.53539e-21
cg08308801	chr10	119867973	CASC2	Body			OpenSea	0.243426	9.61493e-23
cg18005828	chr10	120031911			TRUE		OpenSea	0.288624	5.51937e-23
cg24441440	chr10	120429062			TRUE		OpenSea	0.281231	6.66655e-20
cg13739115	chr10	121094427	GRK5	Body	TRUE		OpenSea	0.201732	7.97781e-20
cg11430259	chr10	123355748	FGFR2	5'UTR			N_Shore	0.208667	9.03356e-19
cg18566515	chr10	123356236	FGFR2	5'UTR			N_Shore	0.211093	2.10797e-19
cg17710779	chr10	123356331	FGFR2	5'UTR			N_Shore	0.20959	9.44875e-17
cg01385327	chr10	123356336	FGFR2	5'UTR			N_Shore	0.218377	4.49093e-16
cg12420900	chr10	123922863	TACC2	TSS1500	TRUE		Island	0.295093	6.80818e-24
cg06733794	chr10	123922970	TACC2	Body	TRUE		Island	0.339721	1.45711e-23
cg24098326	chr10	123923050	TACC2	Body	TRUE		Island	0.290459	6.44014e-21
cg06966660	chr10	123923066	TACC2	Body	TRUE		Island	0.389369	3.92039e-21
cg25307318	chr10	123923081	TACC2	Body	TRUE		Island	0.363634	1.94871e-23
cg10882304	chr10	123923099	TACC2	Body	TRUE		Island	0.25333	7.56795e-23
cg26071526	chr10	123923273	TACC2	Body	TRUE		Island	0.29759	2.57881e-21
cg21951457	chr10	123923450	TACC2	Body	TRUE		Island	0.258942	4.94648e-25
cg10462187	chr10	124067402	BTBD16	Body	TRUE	TRUE	OpenSea	0.264659	8.68647e-26
cg11171221	chr10	124902844					S_Shore	0.226411	6.0435e-15
cg18736101	chr10	126043549			TRUE	TRUE	OpenSea	0.270891	4.56062e-15
cg26258213	chr10	127220321					OpenSea	0.201798	9.36524e-18
cg18690729	chr10	128250156			TRUE		OpenSea	0.249137	2.44232e-22
cg04617948	chr10	129535138	FOXI2	TSS1500			Island	0.208647	8.02176e-19
cg09614415	chr10	129535509	FOXI2	TSS200			Island	0.216922	3.45509e-14
cg26115633	chr10	129535893	FOXI2	1stExon			Island	0.294892	1.12461e-17
cg13929328	chr10	129535898	FOXI2	1stExon			Island	0.218342	6.5906e-18
cg23004031	chr10	131323903	MGMT	Body		TRUE	OpenSea	0.203871	5.4039e-20
cg25386707	chr10	131748428	EBF3	Body	TRUE	TRUE	OpenSea	0.365737	5.59211e-26
cg02449166	chr10	131748481	EBF3	Body	TRUE	TRUE	OpenSea	0.271845	5.34524e-23
cg12107530	chr10	133806858					OpenSea	-0.23284	1.04489e-15
cg10144198	chr10	134001728	DPYSL4	Body			S_Shore	0.210059	5.77992e-22
cg08368875	chr10	134334241					OpenSea	0.204712	1.53177e-19
cg11116274	chr10	134334283					OpenSea	0.201566	2.72923e-19
cg11174855	chr10	134598352	NKX6-2	3'UTR			Island	0.282736	9.69651e-18
cg23563927	chr10	134755679	C10orf93	Body	TRUE	TRUE	Island	0.200436	3.80622e-16
cg05740243	chr10	135160775	PRAP1	TSS200		TRUE	OpenSea	0.229103	2.58153e-17
cg15596666	chr10	135160792	PRAP1	TSS200		TRUE	OpenSea	0.204315	1.12497e-15
cg10742801	chr10	135161047	PRAP1	Body		TRUE	OpenSea	0.204588	2.02884e-16
cg18727742	chr11	288301	ATHL1	TSS1500			N_Shore	0.224251	5.41665e-16
cg06632214	chr11	314074	IFITM1	1stExon		TRUE	N_Shore	0.320237	6.26637e-21
cg14468692	chr11	504784	RNH1	5'UTR		TRUE	N_Shore	0.203089	3.47916e-15
cg23927970	chr11	504933	RNH1	5'UTR		TRUE	N_Shore	0.231755	9.50712e-15
cg23687466	chr11	504937	RNH1	5'UTR		TRUE	N_Shore	0.274476	4.15229e-14
cg00249511	chr11	627152	SCT	5'UTR			Island	0.245902	5.78267e-17
cg25774643	chr11	627175	SCT	TSS200			Island	0.216143	1.05853e-15
cg02659920	chr11	726335	EPS8L2	Body			Island	0.200384	4.08406e-15
cg06085985	chr11	830527	EFCAB4A	Body		TRUE	Island	0.22311	4.33482e-15
cg13104938	chr11	843956	TSPAN4	TSS1500			S_Shore	0.237953	1.20001e-19
cg01097384	chr11	1358675				TRUE	Island	0.223535	8.87107e-18
cg25590114	chr11	1661201	HCCA2	Body			OpenSea	-0.216412	9.23717e-18
cg08269485	chr11	1769382	HCCA2	Body			Island	0.230398	2.84348e-16
cg07592963	chr11	2890649	KCNQ1DN	TSS1500			Island	0.212879	3.26296e-14
cg03143849	chr11	2904951	CDKN1C	3'UTR			N_Shore	0.231898	3.00717e-21
cg17265994	chr11	2905024	CDKN1C	3'UTR			Island	0.281334	1.9192e-22
cg21799346	chr11	2905372	CDKN1C	Body			Island	0.309748	1.97823e-15
cg14488317	chr11	3181446	OSBPL5	5'UTR	TRUE	TRUE	N_Shore	0.287302	7.39369e-26
cg13634736	chr11	3181575	OSBPL5	5'UTR	TRUE	TRUE	Island	0.24843	2.36927e-23
cg22074576	chr11	3181726	OSBPL5	5'UTR	TRUE	TRUE	Island	0.3576	7.06219e-22
cg11678461	chr11	3181822	OSBPL5	5'UTR	TRUE	TRUE	Island	0.25854	3.00095e-24
cg23357130	chr11	3181928	OSBPL5	5'UTR	TRUE	TRUE	Island	0.453147	1.38416e-22
cg13782615	chr11	4079556	STIM1	Body	TRUE		OpenSea	0.267357	3.66833e-25
cg26730416	chr11	4233502					OpenSea	0.271453	3.65834e-16
cg26678920	chr11	6341888	PRKCDBP	TSS200			Island	0.222348	2.65547e-14
cg10064871	chr11	6341908	PRKCDBP	TSS200			Island	0.203248	3.14846e-18
cg26120958	chr11	6439806	APBB1	5'UTR			N_Shore	0.249423	1.76592e-22
cg03559682	chr11	6439864	APBB1	5'UTR			Island	0.254993	1.80554e-19
cg06176750	chr11	7112356	RBMXL2	3'UTR			S_Shore	-0.232728	1.7672e-21
cg24575083	chr11	7695485	CYB5R2	TSS1500		TRUE	Island	0.211256	3.07252e-14
cg16281276	chr11	7695528	CYB5R2	TSS1500		TRUE	Island	0.216155	5.14463e-14
cg20039048	chr11	8305302			TRUE	TRUE	OpenSea	0.253578	7.45192e-25
cg08726522	chr11	8739587	ST5	Body		TRUE	OpenSea	0.298007	3.9178e-26
cg19237879	chr11	9113458	SCUBE2	TSS1500		TRUE	Island	0.224855	9.43347e-16
cg06126019	chr11	9253566	DENND5A	Body	TRUE		OpenSea	0.210073	3.20564e-21
cg11624479	chr11	9285586	DENND5A	Body			N_Shore	0.220581	9.95235e-19
cg23204908	chr11	9824185	SBF2	Body	TRUE		OpenSea	0.233873	3.59896e-21
cg16931664	chr11	11169707			TRUE	TRUE	OpenSea	0.203113	4.14072e-17
cg24543696	chr11	12031046	DKK3	TSS1500		TRUE	S_Shore	0.238208	4.69776e-18
cg23352146	chr11	12701929	TEAD1	5'UTR		TRUE	OpenSea	0.24879	6.8916e-16
cg14381919	chr11	12701969	TEAD1	5'UTR		TRUE	OpenSea	0.224916	1.42182e-15
cg08148891	chr11	13030309	RASSF10	TSS1500		TRUE	N_Shore	0.244819	1.53323e-20
cg20098471	chr11	13032613	RASSF10	Body			S_Shore	0.284878	3.76178e-16
cg15603424	chr11	13300592	ARNTL	5'UTR			Island	0.235519	6.67471e-15
cg05950572	chr11	14004854	SPON1	Body	TRUE		OpenSea	0.224191	2.97345e-16
cg24304093	chr11	14926738			TRUE		Island	0.321303	5.30186e-19
cg14768245	chr11	14926780			TRUE		Island	0.236265	8.10775e-20
cg06535308	chr11	17497693	ABCC8	Body			Island	0.22274	6.76983e-21
cg05183931	chr11	17717588			TRUE		Island	0.248262	6.78525e-16
cg05756029	chr11	18230754	LOC494141	Body			Island	0.214297	1.84152e-17
cg11095319	chr11	19263864	E2F8	TSS1500			Island	0.242653	2.02261e-17
cg20129082	chr11	19736150	LOC100126784	TSS200			S_Shore	0.246846	6.25459e-16
cg25451249	chr11	19736241	LOC100126784	TSS200			S_Shore	0.22826	7.48848e-15
cg09723979	chr11	19736248	LOC100126784	TSS200			S_Shore	0.247011	1.27199e-15
cg24565274	chr11	19736253	LOC100126784	TSS200			S_Shore	0.252468	9.64179e-15
cg07189401	chr11	19736333	LOC100126784	TSS200			S_Shore	0.215673	3.16108e-17
cg04290346	chr11	20177852	DBX1	Body			Island	0.213887	2.17722e-15
cg13445796	chr11	20181725	DBX1	1stExon	TRUE		Island	0.211447	1.50685e-15
cg02878244	chr11	20181911	DBX1	TSS200	TRUE		Island	0.218763	1.41884e-14
cg23632985	chr11	20184637					Island	0.244656	1.95319e-16
cg26142412	chr11	20185077					Island	0.219226	1.03329e-19
cg27142536	chr11	20618198					Island	0.290419	1.67299e-21
cg02027945	chr11	20618230					Island	0.394656	6.12783e-18
cg19859290	chr11	20618399					Island	0.32641	7.31319e-20
cg27603915	chr11	20692113	NELL1	Body			S_Shore	0.220302	8.10966e-19
cg07777008	chr11	27015808	FIBIN	5'UTR	TRUE		OpenSea	0.294229	2.66202e-22
cg15621260	chr11	27015813	FIBIN	5'UTR	TRUE		OpenSea	0.351208	7.24034e-21
cg04622802	chr11	27015872	FIBIN	5'UTR	TRUE		OpenSea	0.257209	8.32216e-19
cg01649773	chr11	27015991	FIBIN	5'UTR	TRUE		OpenSea	0.211628	3.33661e-19
cg12164612	chr11	30037833	KCNA4	5'UTR			Island	0.208415	1.03964e-17
cg11972677	chr11	30605704	MPPED2	5'UTR			Island	0.247142	1.16454e-14
cg24332783	chr11	31818791	PAX6	Body			N_Shore	0.244279	4.87515e-15
cg18988498	chr11	31824262	PAX6	Body			N_Shore	0.221226	8.15786e-16
cg20014398	chr11	31825792	PAX6	Body			Island	0.243059	8.51826e-17
cg09537620	chr11	31826574	PAX6	Body			Island	0.293067	8.14069e-18
cg18372607	chr11	31827084	PAX6	Body			N_Shore	0.267857	5.79322e-21
cg05490712	chr11	31838674	PAX6	5'UTR	TRUE		Island	0.224379	1.61082e-16
cg09656389	chr11	31839790	PAX6	TSS1500			Island	0.227154	8.0394e-18
cg07329360	chr11	31841768					Island	0.233953	3.99419e-19
cg11741189	chr11	31843886			TRUE		S_Shore	0.207766	5.27121e-20
cg03405909	chr11	31845639					N_Shore	0.281447	8.01014e-23
cg03692563	chr11	31846414					N_Shore	0.225575	3.25027e-19
cg08364561	chr11	31846844					N_Shore	0.303633	6.40665e-20
cg07441518	chr11	31846849					N_Shore	0.217534	7.86359e-19
cg12500879	chr11	31848649			TRUE		Island	0.20374	1.25484e-14
cg20019985	chr11	32008961					Island	0.240876	3.67115e-15
cg25247290	chr11	32461212	WIT1	Body			S_Shore	0.260077	9.40634e-16
cg12691382	chr11	33037792	DEPDC7	5'UTR			Island	0.229225	2.3644e-15
cg26268276	chr11	33038313	DEPDC7	Body	TRUE		S_Shore	0.22642	4.15647e-18
cg06560887	chr11	33890371	LMO2	Body			Island	0.246731	1.04437e-16
cg09089242	chr11	33892236	LMO2	TSS1500		TRUE	S_Shore	0.233499	2.95957e-21
cg06148118	chr11	33892246	LMO2	TSS1500		TRUE	S_Shore	0.232667	6.22816e-23
cg07541559	chr11	34288225	ABTB2	Body	TRUE	TRUE	OpenSea	0.21616	3.51596e-23
cg18437209	chr11	35105199			TRUE	TRUE	OpenSea	0.243824	9.1249e-22
cg20143092	chr11	35160330	CD44	TSS200		TRUE	N_Shore	0.259607	1.81207e-15
cg15536165	chr11	35639492	FJX1	TSS1500			N_Shore	0.222587	1.74933e-16
cg08714753	chr11	35639590	FJX1	TSS200			N_Shore	0.230119	2.03363e-16
cg04573276	chr11	35639632	FJX1	TSS200			Island	0.303069	1.75655e-15
cg23083315	chr11	35639656	FJX1	TSS200			Island	0.273485	4.31613e-18
cg26451547	chr11	36397596	PRR5L	5'UTR			N_Shore	0.243131	4.24995e-25
cg08124446	chr11	43596529			TRUE		N_Shore	0.246065	1.11703e-16
cg01681847	chr11	43605269					S_Shelf	0.205206	1.20538e-15
cg04970352	chr11	44327399	ALX4	Body		TRUE	Island	0.270658	7.92732e-21
cg07393734	chr11	44341451			TRUE		Island	0.205075	4.08418e-15
cg01889574	chr11	44590889	CD82	5'UTR		TRUE	S_Shelf	0.227474	2.17335e-19
cg25953350	chr11	45167368	PRDM11	Body		TRUE	N_Shore	0.257326	8.45769e-17
cg07729130	chr11	45167493	PRDM11	Body		TRUE	N_Shore	0.218427	1.19865e-15
cg26290543	chr11	45377324					S_Shore	0.213408	3.16095e-21
cg02364610	chr11	46317036	CREB3L1	Body			Island	0.218914	4.98024e-22
cg14547067	chr11	46317154	CREB3L1	Body			Island	0.320991	9.37168e-18
cg03131732	chr11	46317475	CREB3L1	Body			Island	0.256692	1.91564e-23
cg09896120	chr11	46317577	CREB3L1	Body			S_Shore	0.205991	1.93227e-22
cg21770622	chr11	46383066	DGKZ	Body		TRUE	OpenSea	0.255959	5.68575e-24
cg02865822	chr11	46383141	DGKZ	Body		TRUE	OpenSea	0.217593	2.87281e-23
cg18337963	chr11	46383209	DGKZ	1stExon		TRUE	OpenSea	0.201844	4.24777e-20
cg09242181	chr11	46940517	LRP4	TSS1500		TRUE	S_Shore	0.226841	2.07375e-23
cg08300419	chr11	47208959	PACSIN3	TSS1500			Island	0.346593	2.74599e-19
cg24779587	chr11	47209163	PACSIN3	TSS1500			Island	0.246908	3.32068e-23
cg04959790	chr11	47278977	NR1H3	5'UTR	TRUE	TRUE	OpenSea	0.200334	1.25594e-16
cg07298473	chr11	47279183	NR1H3	5'UTR	TRUE	TRUE	OpenSea	0.271042	7.78352e-24
cg00536939	chr11	47279352	NR1H3	TSS200	TRUE	TRUE	OpenSea	0.294286	7.63254e-21
cg08690459	chr11	47279586	NR1H3	1stExon	TRUE	TRUE	OpenSea	0.209581	1.2266e-23
cg26197915	chr11	48085137	PTPRJ	Body	TRUE	TRUE	OpenSea	0.207056	1.64582e-20
cg11751645	chr11	56947754	LRRC55	TSS1500	TRUE		N_Shore	0.239849	1.49964e-15
cg00522883	chr11	57194120	SLC43A3	5'UTR	TRUE		N_Shore	0.255782	8.05396e-24
cg07067982	chr11	57194370	SLC43A3	5'UTR			Island	0.312741	3.40513e-24
cg19167683	chr11	57194495	SLC43A3	5'UTR		TRUE	Island	0.229828	3.55977e-20
cg07326438	chr11	57194562	SLC43A3	5'UTR		TRUE	Island	0.31871	5.53601e-17
cg00264441	chr11	57250469			TRUE	TRUE	Island	0.381392	3.12637e-25
cg08498787	chr11	57250780			TRUE	TRUE	Island	0.367863	5.59639e-26
cg12783776	chr11	57365948	SERPING1	Body		TRUE	OpenSea	0.243502	5.47448e-22
cg20907456	chr11	57405372				TRUE	OpenSea	0.226945	8.19512e-24
cg05415131	chr11	58940866	DTX4	Body			Island	0.405948	3.50678e-25
cg14329059	chr11	58940964	DTX4	Body			Island	0.307163	1.07326e-26
cg17696194	chr11	58941051	DTX4	Body			Island	0.28736	1.42147e-22
cg07745373	chr11	58941415	DTX4	Body			S_Shore	0.211507	9.27131e-23
cg24158259	chr11	58984544					OpenSea	0.246913	1.22215e-19
cg26090107	chr11	60718882	SLC15A3	1stExon	TRUE	TRUE	Island	0.234995	1.03514e-15
cg06282270	chr11	61062910	VWCE	TSS200		TRUE	Island	0.308297	3.03717e-14
cg01698298	chr11	61062964	VWCE	TSS200		TRUE	Island	0.240944	3.82282e-14
cg02674352	chr11	61275826	LRRC10B	TSS1500	TRUE		Island	0.206072	9.85327e-15
cg06405186	chr11	61283968	SYT7	3'UTR	TRUE		Island	0.302282	4.66919e-22
cg10442157	chr11	61284134	SYT7	3'UTR	TRUE		Island	0.257039	2.09846e-22
cg08752135	chr11	61284417	SYT7	3'UTR	TRUE		S_Shore	0.214794	3.42866e-22
cg16105461	chr11	61485853	DAGLA	5'UTR	TRUE	TRUE	N_Shelf	0.209872	1.65242e-19
cg07005513	chr11	61595956	FADS2	1stExon		TRUE	Island	0.20544	3.77682e-19
cg10868875	chr11	61596307	FADS2	Body		TRUE	Island	0.279067	2.10521e-22
cg19610905	chr11	61596333	FADS2	Body		TRUE	Island	0.276426	7.30115e-25
cg26330416	chr11	62691066				TRUE	Island	0.227105	5.38733e-21
cg23452969	chr11	62691182				TRUE	Island	0.279442	5.58708e-18
cg04557452	chr11	62691251				TRUE	Island	0.294053	2.93309e-19
cg22358236	chr11	62691452				TRUE	Island	0.222437	2.66692e-19
cg09952395	chr11	63258712	HRASLS5	TSS200			Island	0.285967	1.52874e-17
cg23728669	chr11	63258734	HRASLS5	TSS200			Island	0.21849	2.90353e-17
cg13112361	chr11	63258739	HRASLS5	TSS200			Island	0.211551	1.73447e-17
cg22250498	chr11	63258744	HRASLS5	TSS200			Island	0.231703	6.60566e-17
cg22380508	chr11	63381144	PLA2G16	Body			Island	0.231156	8.78324e-16
cg04986616	chr11	63537378	C11orf95	TSS1500			Island	0.30157	9.39128e-21
cg09907758	chr11	63537459	C11orf95	TSS1500			S_Shore	0.255962	1.336e-22
cg22796860	chr11	63828346	MACROD1	Body	TRUE		OpenSea	0.293454	2.4755e-23
cg03103218	chr11	63828672	MACROD1	Body	TRUE		OpenSea	0.248215	1.1565e-17
cg09908110	chr11	63828713	MACROD1	Body	TRUE		OpenSea	0.301793	2.2011e-19
cg01566127	chr11	63828762	MACROD1	Body	TRUE		OpenSea	0.214187	8.25425e-19
cg03784628	chr11	64059937	KCNK4	5'UTR	TRUE	TRUE	Island	0.200019	2.45616e-18
cg19917412	chr11	64815189	NAALADL1	Body	TRUE	TRUE	Island	0.239676	1.04651e-17
cg19885625	chr11	64815313	NAALADL1	Body	TRUE	TRUE	Island	0.21818	9.0018e-17
cg08965235	chr11	65325158	LTBP3	1stExon			Island	0.253567	1.10288e-21
cg16477774	chr11	65325249	LTBP3	1stExon			Island	0.239621	2.15934e-18
cg06065225	chr11	65640137	EFEMP2	5'UTR			Island	0.209178	3.43618e-14
cg24960947	chr11	65816463	GAL3ST3	5'UTR			Island	0.200386	9.81424e-16
cg07145284	chr11	66084631	CD248	TSS200	TRUE	TRUE	S_Shore	0.239856	1.56431e-16
cg13383058	chr11	66084660	CD248	TSS200	TRUE	TRUE	S_Shore	0.214232	7.71535e-18
cg05475524	chr11	66326798	ACTN3	Body		TRUE	Island	0.244049	2.40975e-14
cg05116382	chr11	66327000	ACTN3	Body		TRUE	S_Shore	0.206938	1.29264e-14
cg05743713	chr11	66885240	KDM2A	TSS1500			N_Shore	0.266595	1.44309e-20
cg04434593	chr11	67139546	LOC100130987	Body	TRUE		N_Shore	0.256826	3.03239e-20
cg02659086	chr11	67350976	GSTP1	TSS200		TRUE	Island	0.257948	2.2436e-19
cg04920951	chr11	67351271	GSTP1	1stExon		TRUE	Island	0.283275	2.01021e-19
cg26250609	chr11	67351273	GSTP1	1stExon		TRUE	Island	0.25602	1.02493e-19
cg06928838	chr11	67351490	GSTP1	Body		TRUE	Island	0.294996	1.00002e-23
cg09038676	chr11	67351608	GSTP1	Body		TRUE	Island	0.333681	3.44554e-22
cg11566244	chr11	67351786	GSTP1	Body		TRUE	Island	0.308397	1.90694e-22
cg11096993	chr11	67417958	ACY3	5'UTR		TRUE	OpenSea	0.200775	1.1694e-18
cg12894325	chr11	67418113	ACY3	5'UTR		TRUE	OpenSea	0.217826	2.83377e-18
cg23740940	chr11	68924746				TRUE	Island	0.226238	6.9009e-23
cg03469862	chr11	68924853				TRUE	Island	0.26825	3.58274e-21
cg09177106	chr11	69451645					Island	0.24386	5.10894e-15
cg10784570	chr11	69452398					Island	0.200414	2.38575e-14
cg20014822	chr11	69517103	FGF19	Body			Island	0.227732	4.48203e-17
cg11207763	chr11	69517471	FGF19	Body			N_Shore	0.214456	4.34663e-14
cg04396791	chr11	70508180	SHANK2	Body	TRUE	TRUE	N_Shore	0.222889	6.39489e-18
cg03395558	chr11	70508329	SHANK2	Body	TRUE	TRUE	Island	0.246308	2.24527e-17
cg17627654	chr11	70508410	SHANK2	Body	TRUE	TRUE	Island	0.220224	2.50006e-18
cg06223539	chr11	70517374	SHANK2	Body	TRUE		OpenSea	0.221076	4.12122e-17
cg04505435	chr11	70672511	SHANK2	Body		TRUE	N_Shore	0.306108	3.22696e-19
cg09448677	chr11	70672740	SHANK2	Body		TRUE	N_Shore	0.238488	2.31714e-21
cg01655356	chr11	70672841	SHANK2	Body		TRUE	Island	0.233425	1.28345e-21
cg04262428	chr11	70673256	SHANK2	Body		TRUE	S_Shore	0.200059	3.89822e-21
cg21593030	chr11	70952175			TRUE	TRUE	OpenSea	0.20366	3.95718e-15
cg03567358	chr11	71050535			TRUE		OpenSea	0.243764	2.57505e-23
cg08876932	chr11	71955547	PHOX2A	TSS1500		TRUE	Island	0.234676	4.20203e-19
cg24530250	chr11	71955599	PHOX2A	TSS1500		TRUE	Island	0.266777	3.07471e-19
cg04574090	chr11	74178749	KCNE3	TSS200	TRUE		Island	0.203751	3.14351e-14
cg13430464	chr11	74408131	CHRDL2	Body	TRUE	TRUE	OpenSea	0.205342	2.73694e-21
cg19225602	chr11	75269316			TRUE	TRUE	N_Shelf	0.222291	6.07849e-19
cg05774229	chr11	76033097			TRUE		Island	0.269751	3.45166e-18
cg18395917	chr11	76033367			TRUE		Island	0.327014	7.11886e-23
cg19818890	chr11	76033391			TRUE		Island	0.233903	9.13198e-23
cg05476483	chr11	76750693	B3GNT6	Body	TRUE	TRUE	Island	0.213983	3.46037e-15
cg20852226	chr11	76859010	MYO7A	Body		TRUE	Island	0.268116	2.05365e-18
cg08879470	chr11	76859056	MYO7A	Body		TRUE	Island	0.301664	1.46053e-16
cg08481002	chr11	78131601					S_Shelf	0.260292	9.27852e-20
cg02973171	chr11	82443614	FAM181B	1stExon	TRUE	TRUE	Island	0.260398	2.41336e-16
cg17524136	chr11	84028382	DLG2	Body			OpenSea	0.218553	1.64256e-22
cg18121003	chr11	86085757	CCDC81	TSS200	TRUE		Island	0.239575	5.33861e-18
cg02094273	chr11	86636018			TRUE		OpenSea	0.205118	7.66341e-22
cg11670211	chr11	89224288	NOX4	5'UTR	TRUE		N_Shore	0.250687	4.41403e-20
cg12161228	chr11	89224506	NOX4	1stExon	TRUE		Island	0.32423	8.09087e-18
cg03793270	chr11	89224684	NOX4	5'UTR			Island	0.248575	5.21073e-18
cg17063929	chr11	89224799	NOX4	5'UTR			S_Shore	0.205224	3.60174e-19
cg01577414	chr11	89867653	NAALAD2	TSS200			OpenSea	0.245858	2.68282e-19
cg18540157	chr11	89867679	NAALAD2	TSS200			OpenSea	0.238992	9.32586e-19
cg21817737	chr11	89867704	NAALAD2	TSS200			OpenSea	0.235116	1.50156e-18
cg12403137	chr11	89867809	NAALAD2	TSS200			OpenSea	0.228157	8.35075e-19
cg05500015	chr11	89867819	NAALAD2	5'UTR			OpenSea	0.231729	1.18265e-17
cg13481638	chr11	91957660				TRUE	Island	0.217004	5.97044e-20
cg07603330	chr11	91957992				TRUE	Island	0.238253	1.66979e-15
cg26788672	chr11	91958396				TRUE	Island	0.220888	6.69513e-16
cg25267808	chr11	95779454	MAML2	Body	TRUE		OpenSea	0.3486	3.62451e-23
cg01113811	chr11	95927950	MAML2	Body	TRUE		OpenSea	0.28222	7.24818e-23
cg06716182	chr11	96074944	MAML2	1stExon	TRUE		OpenSea	0.291865	8.73221e-17
cg03243226	chr11	105480979	GRIA4	1stExon			N_Shore	0.229946	2.89215e-16
cg15603568	chr11	105481283	GRIA4	5'UTR			Island	0.227912	5.61391e-16
cg23559689	chr11	105481292	GRIA4	5'UTR			Island	0.205808	4.81704e-15
cg08290076	chr11	110581434	ARHGAP20	Body			N_Shore	0.205461	6.175e-15
cg03475182	chr11	110581454	ARHGAP20	Body			N_Shore	0.220818	4.91676e-16
cg25316749	chr11	111169284	C11orf93	TSS1500		TRUE	N_Shore	0.249966	1.91946e-15
cg26459819	chr11	111169457	C11orf93	TSS1500		TRUE	Island	0.214358	1.71602e-17
cg21645554	chr11	111169473	C11orf93	TSS1500		TRUE	Island	0.270834	2.4883e-14
cg23882862	chr11	111169795	C11orf92	5'UTR		TRUE	Island	0.268549	2.15418e-16
cg15081566	chr11	111169865	C11orf92	5'UTR		TRUE	Island	0.223575	1.55684e-14
cg17390301	chr11	111250093	POU2AF1	1stExon	TRUE		OpenSea	0.209726	6.43498e-20
cg13767940	chr11	111383603	MIR34B	TSS200		TRUE	Island	0.266491	1.02243e-14
cg08827001	chr11	111384048	BTG4	TSS1500			N_Shore	0.212735	4.79205e-17
cg18342462	chr11	111385659	C11orf88	1stExon			Island	0.208332	2.98127e-14
cg02871995	chr11	111410960	LAYN	TSS1500		TRUE	Island	0.25472	5.79382e-22
cg04226536	chr11	111411071	LAYN	TSS200		TRUE	Island	0.215703	3.46291e-23
cg21703322	chr11	111411076	LAYN	TSS200		TRUE	Island	0.22784	1.51273e-22
cg19820372	chr11	111411216	LAYN	TSS200		TRUE	Island	0.280381	3.51924e-23
cg02532096	chr11	111411289	LAYN	5'UTR		TRUE	Island	0.314583	2.25973e-21
cg03864000	chr11	111411381	LAYN	5'UTR		TRUE	Island	0.252127	1.34862e-17
cg15204861	chr11	111783352	CRYAB	TSS1500	TRUE		OpenSea	0.205232	4.18878e-17
cg11694519	chr11	111783563	CRYAB	TSS1500	TRUE		OpenSea	0.224548	1.8204e-16
cg05291374	chr11	111847475	DIXDC1	TSS1500		TRUE	N_Shore	0.222712	6.211e-23
cg20124223	chr11	111847692	DIXDC1	TSS1500		TRUE	N_Shore	0.208306	1.67513e-17
cg24601030	chr11	111847747	DIXDC1	TSS1500		TRUE	N_Shore	0.260178	4.89102e-22
cg05942508	chr11	113846922	HTR3A	Body			OpenSea	0.216754	4.74707e-18
cg12946808	chr11	115493909			TRUE	TRUE	OpenSea	0.204902	1.10397e-18
cg00344443	chr11	115530150			TRUE	TRUE	Island	0.203567	4.35688e-16
cg18021286	chr11	115530371			TRUE	TRUE	Island	0.204332	5.12406e-18
cg18180415	chr11	115530547			TRUE	TRUE	Island	0.210025	1.41996e-14
cg07627556	chr11	115530590			TRUE	TRUE	S_Shore	0.246097	1.99256e-17
cg12564567	chr11	116371188			TRUE		Island	0.276555	5.05702e-18
cg19623012	chr11	116371330			TRUE		Island	0.260718	8.17175e-16
cg21739934	chr11	116371391			TRUE		Island	0.229734	8.17302e-18
cg25896644	chr11	116371487			TRUE		Island	0.282445	3.27719e-18
cg11178148	chr11	116371781			TRUE		S_Shore	0.254443	2.21626e-19
cg27323784	chr11	116451730				TRUE	Island	0.215534	4.17273e-18
cg11861562	chr11	117069780	TAGLN	TSS1500		TRUE	OpenSea	0.255889	2.50402e-18
cg10130564	chr11	117069849	TAGLN	TSS200		TRUE	OpenSea	0.240191	1.20757e-18
cg15534755	chr11	117069859	TAGLN	TSS200		TRUE	OpenSea	0.208763	5.53356e-16
cg16524733	chr11	117070046	TAGLN	5'UTR		TRUE	OpenSea	0.275246	2.4065e-17
cg15101392	chr11	117748132	FXYD6	TSS1500			S_Shore	0.210488	7.82537e-21
cg14485185	chr11	118051260			TRUE		OpenSea	0.268569	1.22643e-23
cg07207490	chr11	118492463	PHLDB1	Body	TRUE	TRUE	OpenSea	0.241708	1.80999e-23
cg20337103	chr11	118781778	BCL9L	TSS200		TRUE	S_Shore	0.200196	4.55105e-17
cg20029201	chr11	118781813	BCL9L	TSS1500		TRUE	S_Shore	0.203337	4.52719e-15
cg21096399	chr11	119188145	MCAM	TSS1500	TRUE		S_Shore	0.228558	2.14173e-24
cg16566400	chr11	119293869	THY1	1stExon		TRUE	Island	0.221913	2.33615e-16
cg02159731	chr11	119613405			TRUE	TRUE	Island	0.204123	1.40544e-15
cg01146320	chr11	120080945	OAF	TSS1500			N_Shore	0.22321	3.50725e-19
cg07976064	chr11	120435056					Island	0.206179	3.31796e-14
cg02184673	chr11	123066560	ASAM	TSS1500		TRUE	Island	0.231922	1.60129e-19
cg25735305	chr11	124629580	ESAM	Body		TRUE	Island	0.235019	1.00121e-16
cg12449685	chr11	124768950	ROBO4	TSS1500		TRUE	OpenSea	0.216825	5.81425e-18
cg19782243	chr11	125133120	PKNOX2	5'UTR	TRUE	TRUE	OpenSea	0.21405	4.67944e-20
cg12911763	chr11	125133335	PKNOX2	5'UTR	TRUE	TRUE	OpenSea	0.268401	1.47548e-22
cg19704853	chr11	125133609	PKNOX2	5'UTR		TRUE	OpenSea	0.224204	4.06199e-19
cg15958289	chr11	126188994	DCPS	Body	TRUE	TRUE	OpenSea	0.219837	9.66467e-20
cg11635839	chr11	129243456					Island	0.255468	9.44179e-17
cg01427458	chr11	133098457	OPCML	Body			OpenSea	0.207345	2.23449e-14
cg19907915	chr11	133821252	IGSF9B	Body	TRUE	TRUE	OpenSea	0.230844	1.72106e-15
cg20771240	chr11	133906693	LOC100128239	Body			N_Shore	0.376217	4.75934e-23
cg06769296	chr11	133906761	LOC100128239	Body			Island	0.33203	1.17682e-23
cg22777979	chr11	134283252	B3GAT1	TSS1500			S_Shore	0.222201	2.68511e-20
cg26388816	chr12	570155	B4GALNT3	Body		TRUE	Island	0.361223	1.41389e-21
cg18612255	chr12	1770715					Island	0.22551	2.99343e-17
cg06997549	chr12	2944163	NRIP2	5'UTR	TRUE	TRUE	OpenSea	0.256224	9.89292e-18
cg03126946	chr12	2944310	NRIP2	TSS200	TRUE	TRUE	OpenSea	0.29283	1.24047e-18
cg00922748	chr12	2944322	NRIP2	TSS200	TRUE	TRUE	OpenSea	0.234536	1.6248e-16
cg02852959	chr12	2944436	NRIP2	TSS1500	TRUE	TRUE	OpenSea	0.303866	1.22215e-16
cg05194726	chr12	2944480	NRIP2	TSS1500	TRUE	TRUE	OpenSea	0.243658	2.03396e-18
cg10231675	chr12	2944493	NRIP2	TSS1500	TRUE	TRUE	OpenSea	0.256802	1.07989e-20
cg18846883	chr12	3451308			TRUE	TRUE	OpenSea	0.215531	4.71558e-24
cg10104252	chr12	3563899					OpenSea	0.21312	3.12857e-19
cg10512292	chr12	4378267				TRUE	N_Shore	0.228245	1.48819e-18
cg05952494	chr12	4378316				TRUE	N_Shore	0.263838	1.32385e-20
cg21462428	chr12	4381448	CCND2	TSS1500			Island	0.227521	2.47353e-17
cg07066369	chr12	4384888	CCND2	Body			S_Shore	0.206249	3.25225e-24
cg00252282	chr12	5542736	NTF3	Body	TRUE		Island	0.240658	1.93534e-17
cg22222281	chr12	6308758	CD9	TSS1500	TRUE	TRUE	N_Shore	0.234644	4.60005e-19
cg07933926	chr12	6485881	SCNN1A	Body	TRUE	TRUE	OpenSea	0.208565	8.22157e-19
cg01244006	chr12	6485916	SCNN1A	Body	TRUE	TRUE	OpenSea	0.204439	8.27711e-18
cg13714344	chr12	6938635	LEPREL2	Body			Island	0.245157	3.10818e-18
cg20972214	chr12	8088818	SLC2A3	1stExon		TRUE	OpenSea	0.228641	3.22118e-19
cg10338338	chr12	8088931	SLC2A3	TSS200			OpenSea	0.206665	5.82526e-21
cg21535657	chr12	11806362	ETV6	Body			S_Shelf	0.207665	5.18574e-18
cg06197769	chr12	12868983	CDKN1B	TSS1500	TRUE		N_Shore	0.229675	1.5273e-18
cg20734421	chr12	14720805	PLBD1	TSS200		TRUE	Island	0.221852	8.56153e-21
cg27488348	chr12	14720834	PLBD1	TSS200		TRUE	Island	0.223947	1.89146e-19
cg20219035	chr12	14720858	PLBD1	TSS200		TRUE	Island	0.240189	3.12702e-20
cg19725903	chr12	14721020	PLBD1	TSS1500		TRUE	Island	0.229783	8.23945e-18
cg05360958	chr12	15038440	MGP	Body	TRUE		OpenSea	0.214615	7.67039e-21
cg00431549	chr12	15039025	MGP	TSS200			OpenSea	0.202224	4.11873e-14
cg23655651	chr12	20365720			TRUE	TRUE	OpenSea	0.227401	6.734e-19
cg27555582	chr12	22094009					Island	0.2555	3.88356e-14
cg16846653	chr12	22094034					Island	0.208718	4.74568e-14
cg24723331	chr12	22487219	ST8SIA1	5'UTR			Island	0.276975	3.92046e-23
cg09354309	chr12	22487437	ST8SIA1	5'UTR			Island	0.27011	2.77249e-15
cg10333808	chr12	22487459	ST8SIA1	5'UTR			Island	0.275752	2.17453e-16
cg23792314	chr12	25056243	BCAT1	Body	TRUE		Island	0.218994	4.93494e-18
cg25451893	chr12	25538177			TRUE		Island	0.274188	8.01283e-23
cg13910046	chr12	25538221			TRUE		Island	0.266838	1.82276e-22
cg25572367	chr12	25538380			TRUE		N_Shore	0.201967	1.4661e-15
cg04100595	chr12	27615138					OpenSea	0.212219	3.70366e-18
cg11390073	chr12	29302515				TRUE	Island	0.217767	1.19621e-20
cg15885440	chr12	29302714				TRUE	Island	0.245146	1.00108e-21
cg14258853	chr12	29935411	TMTC1	5'UTR			N_Shore	0.255802	1.57589e-15
cg10512875	chr12	29936174	TMTC1	5'UTR		TRUE	Island	0.255049	2.89845e-19
cg12064372	chr12	30948792					Island	0.246424	4.29923e-15
cg19540425	chr12	32655836	FGD4	5'UTR	TRUE		OpenSea	0.25218	9.37597e-22
cg13519035	chr12	34261006					Island	0.242052	4.71877e-19
cg14497054	chr12	34261116					Island	0.210149	1.42241e-16
cg11684647	chr12	40618356	LRRK2	TSS1500		TRUE	Island	0.200078	1.51225e-18
cg14243778	chr12	41086879	CNTN1	5'UTR	TRUE		Island	0.235376	5.28981e-18
cg19034038	chr12	45443996	DBX2	Body			N_Shore	0.220902	1.1246e-20
cg12686055	chr12	45628262	ANO6	Body	TRUE		OpenSea	0.202899	1.09946e-21
cg04923020	chr12	46005007					OpenSea	0.223014	7.06502e-25
cg14239655	chr12	46005115					OpenSea	0.279432	1.15633e-24
cg26724975	chr12	46554412			TRUE		OpenSea	0.207086	8.37073e-22
cg20408693	chr12	46767289	SLC38A2	TSS1500			S_Shore	0.219556	6.26353e-16
cg04053798	chr12	47219705	SLC38A4	1stExon			OpenSea	0.202447	4.68896e-16
cg11146691	chr12	47219737	SLC38A4	1stExon			OpenSea	0.317183	2.05555e-16
cg17501823	chr12	47219793	SLC38A4	TSS200			OpenSea	0.262932	5.35914e-17
cg21428710	chr12	47219797	SLC38A4	TSS200			OpenSea	0.215966	1.57516e-18
cg07601320	chr12	47219841	SLC38A4	TSS200			OpenSea	0.216285	1.84872e-16
cg11331445	chr12	47219877	SLC38A4	TSS200			OpenSea	0.235814	8.85595e-16
cg22868282	chr12	47224954			TRUE		Island	0.214385	8.24553e-15
cg08135379	chr12	47474763	AMIGO2	TSS1500		TRUE	S_Shore	0.227112	2.66597e-15
cg16266579	chr12	48591673			TRUE	TRUE	N_Shore	0.306023	1.01054e-17
cg26205652	chr12	48591994			TRUE	TRUE	Island	0.36835	4.67027e-16
cg08184792	chr12	48592270				TRUE	Island	0.299768	1.01052e-19
cg14121142	chr12	49391363	DDN	Body			Island	0.203069	4.48184e-17
cg05140648	chr12	49391920	DDN	Body			Island	0.249419	2.17535e-21
cg15661753	chr12	49627010			TRUE		N_Shore	0.234001	1.59881e-17
cg09049251	chr12	50297477	FAIM2	Body	TRUE	TRUE	N_Shore	0.211294	1.7655e-15
cg27188703	chr12	50297581	FAIM2	1stExon	TRUE		Island	0.293663	7.8939e-19
cg16115588	chr12	50297588	FAIM2	1stExon	TRUE	TRUE	Island	0.275368	5.84169e-20
cg18486102	chr12	50297777	FAIM2	TSS200	TRUE		Island	0.321356	5.36124e-19
cg06947913	chr12	50297793	FAIM2	TSS200	TRUE	TRUE	Island	0.351076	2.97769e-21
cg04669574	chr12	50297945	FAIM2	TSS1500	TRUE	TRUE	Island	0.221409	1.89275e-19
cg08266366	chr12	50354998	AQP5	TSS1500			Island	0.2861	3.16228e-22
cg15336765	chr12	50355307	AQP5	1stExon			Island	0.343805	1.95013e-18
cg13490422	chr12	50377731			TRUE	TRUE	OpenSea	0.245687	6.58661e-23
cg19604907	chr12	50444723			TRUE	TRUE	OpenSea	0.2036	4.44988e-17
cg23497020	chr12	50616562	LIMA1	Body		TRUE	OpenSea	0.265628	1.18341e-21
cg12439325	chr12	51236768	TMPRSS12	1stExon	TRUE		Island	0.210015	5.91669e-19
cg20092892	chr12	52258077			TRUE		Island	0.204045	9.4651e-15
cg02392696	chr12	52258264			TRUE		S_Shore	0.228535	1.65524e-15
cg04034767	chr12	52400907	GRASP	1stExon		TRUE	Island	0.31571	5.2862e-18
cg00817367	chr12	52401214	GRASP	Body		TRUE	Island	0.376891	3.39013e-25
cg06970510	chr12	52401448	GRASP	Body			Island	0.305559	2.43364e-19
cg15994467	chr12	52401523	GRASP	Body		TRUE	Island	0.257783	7.7275e-20
cg07967679	chr12	52626814	KRT7	TSS200		TRUE	Island	0.230108	5.1746e-18
cg08975803	chr12	52626818	KRT7	TSS200		TRUE	Island	0.224076	5.44364e-20
cg07007400	chr12	52626831	KRT7	TSS200		TRUE	Island	0.221141	2.56856e-17
cg14482313	chr12	52626889	KRT7	TSS200		TRUE	Island	0.223986	1.7489e-14
cg14537533	chr12	52626904	KRT7	TSS200		TRUE	Island	0.214998	2.52008e-14
cg22193385	chr12	52638005	KRT7	Body	TRUE	TRUE	N_Shore	0.206393	1.93799e-20
cg02305765	chr12	53107910			TRUE		N_Shore	0.262038	9.77194e-18
cg08691567	chr12	53183930	KRT3	Body			Island	0.254043	4.28054e-18
cg01492330	chr12	53184005	KRT3	Body			S_Shore	0.290052	1.58018e-16
cg13885357	chr12	53184041	KRT3	Body			S_Shore	0.388647	1.43336e-16
cg15608277	chr12	53184086	KRT3	Body			S_Shore	0.295387	6.03618e-16
cg02303897	chr12	53268136					Island	0.251129	6.01224e-17
cg17419626	chr12	53268268					Island	0.224996	4.04306e-22
cg05393297	chr12	53359155			TRUE		N_Shore	0.224591	3.66939e-17
cg25025879	chr12	53359317			TRUE		Island	0.263659	2.5906e-19
cg16329197	chr12	53359506			TRUE		Island	0.244431	4.8021e-20
cg13937905	chr12	53612551	RARG	Body			N_Shore	0.210963	3.47039e-19
cg10592478	chr12	53612641	RARG	Body			N_Shore	0.289405	1.05983e-21
cg09107344	chr12	53612734	RARG	Body			N_Shore	0.253807	2.17894e-22
cg20059012	chr12	53613154	RARG	Body			N_Shore	0.322594	2.30934e-20
cg13940444	chr12	53617382	RARG	Body	TRUE	TRUE	S_Shelf	0.302852	6.90998e-21
cg16331883	chr12	53886170	MAP3K12	5'UTR			N_Shore	0.215233	6.06602e-21
cg25810484	chr12	54089486			TRUE		S_Shore	0.222201	8.28708e-16
cg11560280	chr12	54089497			TRUE		S_Shore	0.230972	9.98055e-15
cg23533419	chr12	54090519					S_Shore	0.203481	1.91587e-22
cg00028308	chr12	54090754					S_Shore	0.215005	4.04426e-16
cg13990926	chr12	54133447					S_Shore	0.29509	2.03174e-16
cg14950169	chr12	54145841					S_Shore	0.294964	1.87427e-16
cg08190858	chr12	54321346					Island	0.293504	4.90749e-18
cg07915921	chr12	54321502					Island	0.264846	8.45095e-15
cg21707187	chr12	54345862			TRUE		Island	0.257897	9.07643e-15
cg05516489	chr12	54359761	HOTAIR	Body			Island	0.202361	1.37331e-14
cg00079219	chr12	54360131	HOTAIR	Body			N_Shore	0.220953	6.04932e-18
cg03132556	chr12	54366760	HOXC11	TSS200			N_Shore	0.244411	2.15149e-14
cg08962452	chr12	54366816	HOXC11	TSS200			Island	0.219269	8.8807e-16
cg22709192	chr12	54366909	HOXC11	5'UTR	TRUE		Island	0.222932	1.13214e-17
cg03536474	chr12	54367460	HOXC11	1stExon	TRUE		Island	0.210445	2.33107e-14
cg09887284	chr12	54388147				TRUE	Island	0.202192	1.13529e-15
cg24208826	chr12	54389891				TRUE	S_Shore	0.266483	3.6096e-16
cg13545297	chr12	54404315	HOXC8	Body	TRUE		S_Shore	0.214837	1.25572e-19
cg03078363	chr12	54408664					Island	0.346442	4.95157e-27
cg04105511	chr12	54409207	HOXC4	TSS1500			S_Shore	0.201932	1.44919e-16
cg26019295	chr12	54409212	HOXC4	TSS1500			S_Shore	0.219445	1.32225e-16
cg01473837	chr12	54409321	HOXC4	TSS1500			S_Shore	0.208797	7.83103e-17
cg16937769	chr12	54409485	HOXC4	TSS1500			S_Shore	0.248066	7.9958e-22
cg04704531	chr12	54409491	HOXC4	TSS1500			S_Shore	0.284444	3.11688e-23
cg06714180	chr12	54409525	HOXC4	TSS1500			S_Shore	0.297132	8.97307e-18
cg15817960	chr12	54409599	HOXC4	TSS1500			S_Shore	0.230353	5.87766e-16
cg13726459	chr12	54409657	HOXC4	TSS1500			S_Shore	0.218993	2.34862e-21
cg07080050	chr12	54413345	HOXC4	5'UTR			Island	0.200821	3.9689e-15
cg03892356	chr12	54420837	HOXC4	5'UTR			N_Shelf	0.298327	3.53744e-21
cg00506343	chr12	54421033	HOXC4	5'UTR			N_Shelf	0.231611	8.29587e-24
cg23618344	chr12	54423428	HOXC4	5'UTR			Island	0.316811	1.24596e-18
cg23697546	chr12	54424085	HOXC4	5'UTR			N_Shore	0.282546	8.35696e-18
cg13826247	chr12	54424203	HOXC4	5'UTR			N_Shore	0.205938	3.72309e-18
cg00040312	chr12	54424679	HOXC4	5'UTR			Island	0.243905	1.94927e-20
cg18054172	chr12	54424902	HOXC4	5'UTR			Island	0.207846	2.57415e-18
cg10005224	chr12	54424964	HOXC4	5'UTR			Island	0.217424	2.30401e-18
cg21041775	chr12	54425418	HOXC4	5'UTR		TRUE	N_Shore	0.213934	3.51266e-18
cg00218447	chr12	54428171	HOXC4	5'UTR			Island	0.267032	1.44624e-18
cg21216477	chr12	54440773	HOXC4	5'UTR			Island	0.221308	5.55421e-20
cg08465346	chr12	54441458	HOXC4	5'UTR			Island	0.260048	2.06136e-19
cg22151644	chr12	54444047	HOXC4	5'UTR			N_Shore	0.2024	4.24353e-19
cg11594833	chr12	54444985	HOXC4	5'UTR		TRUE	N_Shore	0.201447	4.35739e-16
cg18695839	chr12	54446944	HOXC4	5'UTR	TRUE	TRUE	N_Shore	0.257127	3.51128e-19
cg18922524	chr12	54447136	HOXC4	5'UTR	TRUE	TRUE	N_Shore	0.203414	4.47681e-20
cg03923561	chr12	54447220	HOXC4	5'UTR	TRUE	TRUE	N_Shore	0.312982	1.45153e-23
cg02264990	chr12	54447243	HOXC4	5'UTR	TRUE	TRUE	N_Shore	0.313261	6.77185e-25
cg09720701	chr12	54447283	HOXC4	5'UTR		TRUE	N_Shore	0.23778	1.61521e-20
cg15233062	chr12	54447349	HOXC4	5'UTR		TRUE	N_Shore	0.293849	1.78268e-21
cg11585893	chr12	54447430	HOXC4	5'UTR		TRUE	N_Shore	0.201056	4.29059e-18
cg07266404	chr12	54447584	HOXC4	5'UTR		TRUE	N_Shore	0.287934	9.54081e-23
cg15894722	chr12	54447596	HOXC4	5'UTR		TRUE	N_Shore	0.226488	2.3071e-18
cg01524853	chr12	54447807	HOXC4	1stExon		TRUE	Island	0.226571	1.32835e-23
cg22747076	chr12	54447873	HOXC4	1stExon		TRUE	Island	0.381969	7.0368e-24
cg11746813	chr12	54448090	HOXC4	1stExon		TRUE	Island	0.227948	2.30762e-20
cg03146625	chr12	54448729	HOXC4	Body			S_Shore	0.201716	5.83701e-18
cg23489434	chr12	54500175	FLJ12825	Body			Island	0.278433	5.28561e-22
cg11306441	chr12	54520919	LOC400043	Body		TRUE	S_Shore	0.309288	5.30039e-18
cg27408285	chr12	54653364	CBX5	1stExon		TRUE	OpenSea	0.310859	1.66933e-23
cg23824801	chr12	54653403	CBX5	TSS200		TRUE	OpenSea	0.294414	5.61905e-24
cg20687242	chr12	54653427	CBX5	TSS200		TRUE	OpenSea	0.265718	2.5062e-20
cg20474425	chr12	54746067			TRUE		OpenSea	0.228178	2.57302e-22
cg23795217	chr12	54812000	ITGA5	Body			Island	0.228719	3.30227e-15
cg03826594	chr12	54812085	ITGA5	Body			Island	0.232195	2.50525e-14
cg24725263	chr12	56101328	ITGA7	1stExon	TRUE	TRUE	Island	0.256746	1.37398e-20
cg04850731	chr12	57618943	NXPH4	Body			Island	0.204863	6.10445e-17
cg01708411	chr12	57631839	NDUFA4L2	5'UTR			N_Shore	0.216371	1.20403e-15
cg13212283	chr12	57632120	NDUFA4L2	5'UTR			Island	0.242934	8.94525e-20
cg04270799	chr12	57944059	KIF5A	1stExon			S_Shore	0.211273	1.13384e-19
cg01644731	chr12	58236712	CTDSP2	Body			N_Shelf	0.214209	1.34374e-17
cg25707722	chr12	63025490			TRUE	TRUE	N_Shore	0.248744	1.08076e-16
cg11155687	chr12	63025589			TRUE	TRUE	Island	0.279034	1.82567e-15
cg08244085	chr12	63025730			TRUE	TRUE	Island	0.299239	1.2767e-16
cg26386409	chr12	63025771			TRUE	TRUE	Island	0.282529	7.03854e-16
cg15916192	chr12	63025948			TRUE	TRUE	Island	0.26383	4.58831e-15
cg01804193	chr12	63026212			TRUE	TRUE	Island	0.261068	1.25792e-14
cg09266771	chr12	63207138	PPM1H	Body		TRUE	OpenSea	0.242201	4.88118e-23
cg01643123	chr12	63207179	PPM1H	Body		TRUE	OpenSea	0.370502	4.14979e-23
cg27454064	chr12	64215611					Island	0.212133	2.65783e-21
cg22510727	chr12	64541117	SRGAP1	3'UTR			OpenSea	0.235457	2.23082e-24
cg23013309	chr12	65218841			TRUE		Island	0.306676	5.96606e-19
cg08815398	chr12	65218869			TRUE		Island	0.229876	4.90073e-18
cg06234063	chr12	65219392			TRUE		S_Shore	0.268351	5.07345e-26
cg09486902	chr12	65219478			TRUE		S_Shore	0.319502	1.97296e-25
cg06092265	chr12	65219655					S_Shore	0.238583	6.3764e-26
cg16355305	chr12	65220152				TRUE	S_Shore	0.245697	1.71855e-25
cg00592781	chr12	66122874			TRUE		Island	0.21768	4.06925e-18
cg10083898	chr12	66123380			TRUE		S_Shore	0.205658	1.02141e-16
cg15394142	chr12	66275988	HMGA2	Body	TRUE		OpenSea	0.228719	2.81224e-16
cg26279550	chr12	66582805	IRAK3	TSS200		TRUE	Island	0.201635	6.01032e-16
cg20162652	chr12	66629018	IRAK3	Body			OpenSea	0.316176	1.91954e-15
cg03188000	chr12	68634913					OpenSea	0.219453	6.76301e-18
cg02544037	chr12	68759069			TRUE	TRUE	OpenSea	0.214364	4.44587e-17
cg24234651	chr12	75728471	GLIPR1L1	5'UTR		TRUE	OpenSea	0.218698	1.95346e-16
cg23520422	chr12	76423956	PHLDA1	3'UTR			N_Shore	0.252416	2.78441e-20
cg05854114	chr12	77719408					Island	0.238782	3.35662e-14
cg05860723	chr12	81102486	MYF6	Body			Island	0.207698	5.10486e-19
cg00354572	chr12	81471419	ACSS3	TSS1500			N_Shore	0.213083	1.16763e-17
cg25971727	chr12	81471533	ACSS3	TSS1500			N_Shore	0.217263	4.21438e-16
cg21754400	chr12	81471649	ACSS3	TSS200			Island	0.237792	7.52889e-16
cg11659501	chr12	81471678	ACSS3	TSS200			Island	0.291299	3.70117e-18
cg23614791	chr12	81471754	ACSS3	TSS200			Island	0.230768	1.6495e-14
cg25358039	chr12	81471757	ACSS3	TSS200			Island	0.227384	1.97503e-14
cg13273396	chr12	81471867	ACSS3	1stExon			Island	0.307335	1.92995e-17
cg24711649	chr12	81472118	ACSS3	1stExon			Island	0.230414	3.06405e-16
cg10866060	chr12	83592588			TRUE		OpenSea	0.230237	4.60202e-22
cg16733705	chr12	85667616					OpenSea	0.218484	7.89773e-17
cg13916459	chr12	85673221	ALX1	TSS1500			N_Shore	0.315864	1.64118e-19
cg14996220	chr12	85673270	ALX1	TSS1500			N_Shore	0.201264	1.24594e-21
cg25281029	chr12	88969462	KITLG	Body			N_Shelf	0.2053	1.14781e-21
cg00772407	chr12	89744471	DUSP6	Body			N_Shore	0.216695	3.42265e-20
cg07239716	chr12	89744488	DUSP6	Body			N_Shore	0.228347	6.61109e-25
cg01814191	chr12	89744524	DUSP6	Body			N_Shore	0.231106	1.6222e-23
cg17740822	chr12	89744609	DUSP6	Body			N_Shore	0.210021	1.77037e-23
cg25124406	chr12	89744662	DUSP6	Body			N_Shore	0.266003	1.49036e-21
cg05769889	chr12	89744701	DUSP6	Body			N_Shore	0.355911	8.09394e-28
cg01242903	chr12	89744877	DUSP6	Body			N_Shore	0.241341	3.71549e-21
cg25006194	chr12	94288553			TRUE		OpenSea	0.278576	1.68988e-22
cg07533511	chr12	94580931	PLXNC1	Body	TRUE		S_Shore	0.208667	2.78984e-22
cg23982858	chr12	95941869	USP44	5'UTR		TRUE	N_Shore	0.265721	5.74324e-22
cg00927554	chr12	95941920	USP44	5'UTR			Island	0.310211	1.19055e-20
cg22538054	chr12	95941988	USP44	5'UTR		TRUE	Island	0.386165	2.39258e-20
cg26584545	chr12	96183197	NTN4	Body			N_Shore	0.208021	6.47393e-15
cg08113245	chr12	96252176	SNRPF	TSS1500			Island	0.201533	3.86921e-17
cg26911787	chr12	96587734	ELK3	TSS1500			N_Shore	0.261424	1.82559e-14
cg07130150	chr12	96883863					S_Shore	0.220387	8.70906e-18
cg08993878	chr12	98151379					OpenSea	0.208434	2.30346e-19
cg09831105	chr12	99287469	ANKS1B	Body			N_Shore	0.214386	6.09209e-19
cg21961771	chr12	100750652	SLC17A8	TSS1500	TRUE		OpenSea	0.238757	2.04991e-23
cg14077898	chr12	100750695	SLC17A8	TSS200	TRUE		OpenSea	0.284156	6.32108e-25
cg24446178	chr12	100750702	SLC17A8	TSS200	TRUE		OpenSea	0.239502	2.69479e-23
cg06563300	chr12	100750811	SLC17A8	TSS200	TRUE		OpenSea	0.289464	2.72486e-23
cg21429394	chr12	100750899	SLC17A8	1stExon	TRUE		OpenSea	0.205426	1.93641e-24
cg26833652	chr12	102036256	MYBPC1	Body	TRUE		Island	0.206754	5.4153e-17
cg23891273	chr12	102036400	MYBPC1	Body	TRUE		Island	0.256341	6.55639e-15
cg27117792	chr12	102330180			TRUE	TRUE	OpenSea	0.221365	3.82095e-21
cg24676120	chr12	102821557	IGF1	Body	TRUE		OpenSea	0.217187	3.64244e-23
cg06652329	chr12	102874566	IGF1	TSS200			OpenSea	0.22015	4.10433e-18
cg16085568	chr12	103311088	PAH	5'UTR	TRUE		Island	0.218679	6.94947e-16
cg21490980	chr12	103311138	PAH	5'UTR	TRUE		Island	0.251941	2.62151e-16
cg15963417	chr12	103311300	PAH	5'UTR	TRUE		S_Shore	0.335515	2.06011e-17
cg24759821	chr12	103311462	PAH	TSS200	TRUE		S_Shore	0.240824	3.01686e-17
cg18919225	chr12	103311494	PAH	TSS200	TRUE		S_Shore	0.256546	1.93397e-18
cg24167314	chr12	103311500	PAH	TSS200	TRUE		S_Shore	0.30361	1.72476e-18
cg16188209	chr12	103311596	PAH	TSS1500	TRUE		S_Shore	0.224613	4.54179e-15
cg18827332	chr12	103344506			TRUE		Island	0.208187	5.14949e-22
cg19589939	chr12	103355326					N_Shelf	0.200419	4.11716e-18
cg02305377	chr12	103355958				TRUE	N_Shelf	0.278962	2.59597e-20
cg02860602	chr12	103356060				TRUE	N_Shelf	0.205143	2.86584e-19
cg11549972	chr12	103358649					N_Shore	0.209037	3.55281e-16
cg03239178	chr12	103358881					N_Shore	0.208088	4.83596e-17
cg00957641	chr12	103406953			TRUE		OpenSea	0.251381	3.51919e-22
cg22274539	chr12	103696209	C12orf42	Body	TRUE		Island	0.288255	2.1587e-16
cg27663938	chr12	103696381	C12orf42	Body			Island	0.304186	1.95477e-21
cg14142965	chr12	104609432	TXNRD1	TSS200			Island	0.473518	8.74335e-21
cg17395064	chr12	104609476	TXNRD1	TSS200			Island	0.325701	5.57584e-25
cg26973714	chr12	104609524	TXNRD1	TSS200			Island	0.26312	1.14909e-26
cg07227926	chr12	104609526	TXNRD1	TSS200			Island	0.310823	6.20857e-24
cg21858255	chr12	104609609	TXNRD1	1stExon			Island	0.307788	1.17582e-21
cg05741937	chr12	104609797	TXNRD1	Body			Island	0.260108	2.6796e-21
cg11739675	chr12	104852151	CHST11	Body			Island	0.279722	9.8114e-19
cg01940855	chr12	104852355	CHST11	Body			Island	0.332738	2.01212e-19
cg23855505	chr12	104852439	CHST11	Body			S_Shore	0.383479	3.43549e-23
cg22260952	chr12	104852446	CHST11	Body			S_Shore	0.391944	9.58593e-20
cg16861031	chr12	105477526	ALDH1L2	Body	TRUE		N_Shore	0.212457	9.37125e-18
cg03607813	chr12	105948248			TRUE		OpenSea	0.20196	7.72126e-16
cg23330006	chr12	106507713	NUAK1	Body	TRUE		OpenSea	0.214617	9.55833e-18
cg12433395	chr12	106533667	NUAK1	5'UTR			Island	0.254122	2.31091e-22
cg17393917	chr12	106533840	NUAK1	TSS200			S_Shore	0.210323	3.04617e-21
cg23555120	chr12	106533863	NUAK1	TSS200			S_Shore	0.242388	4.9533e-21
cg18525352	chr12	106533867	NUAK1	TSS200			S_Shore	0.308878	2.90718e-21
cg20060685	chr12	106533898	NUAK1	TSS200			S_Shore	0.270602	2.59842e-22
cg26477549	chr12	106642937	CKAP4	TSS1500			S_Shore	0.20248	5.68872e-20
cg00450784	chr12	106979062	RFX4	Body	TRUE		N_Shore	0.287333	7.57692e-16
cg17851046	chr12	106979078	RFX4	Body	TRUE		N_Shore	0.203441	2.36993e-16
cg00379648	chr12	106979451	RFX4	Body	TRUE		Island	0.203976	5.29225e-16
cg13935577	chr12	107974897	BTBD11	Body			Island	0.226615	1.65024e-22
cg04290586	chr12	108168987	ASCL4	1stExon	TRUE		Island	0.217712	2.06267e-15
cg20443254	chr12	108169020	ASCL4	1stExon	TRUE		Island	0.264048	2.699e-15
cg24856726	chr12	108169333	ASCL4	1stExon	TRUE		Island	0.2202	4.8064e-15
cg10651121	chr12	109549097				TRUE	Island	0.236748	4.04681e-19
cg16624888	chr12	109711141					OpenSea	0.217302	5.01663e-20
cg01589998	chr12	109729478	FOXN4	Body	TRUE	TRUE	N_Shore	0.273874	2.38535e-20
cg17410295	chr12	109729809	FOXN4	Body	TRUE	TRUE	Island	0.209667	9.26119e-17
cg14779797	chr12	110150087					Island	0.208005	9.2649e-20
cg12929027	chr12	110150180					Island	0.248661	2.28989e-21
cg01335367	chr12	110172208	MGC14436	Body			OpenSea	0.294315	1.43295e-22
cg08141615	chr12	110172214	MGC14436	Body			OpenSea	0.23236	6.8884e-20
cg11365617	chr12	110174620	MGC14436	Body	TRUE	TRUE	OpenSea	0.217342	5.74436e-19
cg27447477	chr12	111023252					S_Shelf	0.236936	1.06001e-24
cg06980169	chr12	111127139	HVCN1	TSS200	TRUE		Island	0.272535	2.11382e-20
cg22325530	chr12	111127346	HVCN1	TSS1500	TRUE	TRUE	Island	0.209803	4.07045e-23
cg25598159	chr12	111127533	HVCN1	1stExon	TRUE	TRUE	S_Shore	0.250439	4.81149e-25
cg26416887	chr12	111618925	CUX2	Body			OpenSea	0.256388	2.14839e-21
cg26874693	chr12	111618936	CUX2	Body			OpenSea	0.235262	5.38547e-22
cg27664496	chr12	113515835	DTX1	Body			Island	0.2068	2.99592e-16
cg00990385	chr12	113587690	CCDC42B	1stExon	TRUE		N_Shelf	0.220828	2.26103e-18
cg08658787	chr12	113916646					Island	0.231675	4.7906e-17
cg09887059	chr12	113916664					Island	0.251871	4.56687e-18
cg21229570	chr12	115124768			TRUE		Island	0.254896	2.13886e-16
cg12368612	chr12	115135999					Island	0.274388	3.60881e-16
cg07147449	chr12	115136072					Island	0.325294	2.62066e-14
cg15266705	chr12	115136096					Island	0.300615	9.65939e-17
cg22586653	chr12	115136098					Island	0.287961	2.00714e-16
cg22489153	chr12	115136175					Island	0.242758	1.24624e-16
cg19887700	chr12	115136200					Island	0.288774	2.09822e-16
cg17101165	chr12	115136226					Island	0.313525	1.62354e-16
cg01622437	chr12	115136246					Island	0.320754	8.78731e-17
cg12106728	chr12	115136258					Island	0.387416	2.91494e-16
cg07969619	chr12	115136279					Island	0.317003	1.89056e-16
cg23367107	chr12	115136287					Island	0.360416	5.57123e-16
cg12513880	chr12	115136298					Island	0.332721	1.64375e-16
cg11199046	chr12	115136308					Island	0.266812	4.93225e-16
cg10030843	chr12	115303226			TRUE		OpenSea	0.254447	6.06715e-23
cg02619661	chr12	116036878			TRUE		OpenSea	0.235389	6.11587e-16
cg16519192	chr12	116037126			TRUE		OpenSea	0.262999	1.21976e-20
cg13708158	chr12	116037223			TRUE		OpenSea	0.250946	7.58595e-20
cg08693490	chr12	116757896			TRUE	TRUE	OpenSea	0.215657	3.09519e-22
cg27656459	chr12	116796562			TRUE		OpenSea	0.203021	3.35433e-16
cg10665891	chr12	117042917					OpenSea	0.201578	1.88833e-15
cg13073224	chr12	117131523			TRUE		OpenSea	0.226592	4.68938e-16
cg02336762	chr12	118313990	KSR2	Body			OpenSea	0.244571	2.2331e-18
cg25023596	chr12	118627943	TAOK3	Body	TRUE		OpenSea	0.225983	1.69912e-22
cg15341350	chr12	119446891	SRRM4	Body			OpenSea	0.287272	5.27632e-17
cg18881778	chr12	120241287	CIT	Body			N_Shore	0.211022	2.71782e-22
cg21879102	chr12	120241409	CIT	Body			N_Shore	0.215015	2.22517e-20
cg20840795	chr12	120242394	CIT	Body	TRUE	TRUE	S_Shore	0.229943	2.74326e-23
cg14132388	chr12	120242490	CIT	Body		TRUE	S_Shore	0.208739	5.7948e-20
cg24973993	chr12	120242513	CIT	Body		TRUE	S_Shore	0.220562	1.84186e-20
cg26008908	chr12	120799332	MSI1	Body	TRUE	TRUE	N_Shore	0.207875	8.47916e-21
cg00257296	chr12	120799373	MSI1	Body	TRUE	TRUE	Island	0.260027	6.5763e-21
cg25561140	chr12	120799725	MSI1	Body	TRUE	TRUE	Island	0.295248	8.17326e-21
cg20569203	chr12	120799911	MSI1	Body	TRUE	TRUE	Island	0.237175	9.11575e-22
cg01029623	chr12	122016779	KDM2B	Body		TRUE	Island	0.237904	2.71851e-23
cg03241244	chr12	122017052	KDM2B	Body		TRUE	Island	0.227013	1.1876e-19
cg09213964	chr12	122668037	LRRC43	5'UTR		TRUE	Island	0.207344	4.1146e-16
cg24954684	chr12	122907641	CLIP1	TSS1500		TRUE	S_Shore	0.207126	3.15903e-16
cg24467291	chr12	122907814	CLIP1	TSS1500			S_Shore	0.235933	1.29522e-19
cg11026555	chr12	124247223	DNAH10	Body		TRUE	Island	0.292882	3.63223e-15
cg20337996	chr12	124780809	FAM101A	5'UTR		TRUE	S_Shore	0.207236	4.18906e-16
cg17387577	chr12	124864657	NCOR2	Body		TRUE	OpenSea	0.255913	1.06881e-20
cg00765705	chr12	124865130	NCOR2	Body		TRUE	OpenSea	0.258009	1.26374e-17
cg12232388	chr12	125027851			TRUE	TRUE	N_Shore	0.204655	1.81076e-16
cg17322044	chr12	125140105			TRUE	TRUE	OpenSea	0.288909	6.10968e-22
cg08336425	chr12	125140167			TRUE	TRUE	OpenSea	0.256665	2.08995e-20
cg08330950	chr12	125140249			TRUE	TRUE	OpenSea	0.226484	1.31992e-17
cg10807894	chr12	125169804			TRUE	TRUE	OpenSea	0.226596	2.57065e-23
cg00174573	chr12	125172635			TRUE		OpenSea	0.261969	1.75716e-22
cg13133835	chr12	125239803			TRUE	TRUE	OpenSea	0.220595	3.04081e-18
cg18235050	chr12	126676048					Island	0.242311	5.34641e-15
cg04475027	chr12	128752040	TMEM132C	Body		TRUE	Island	0.232373	1.95781e-15
cg00579520	chr12	128752586	TMEM132C	Body			Island	0.223525	2.01171e-19
cg10639585	chr12	130387131	TMEM132D	Body			N_Shore	0.20058	3.0991e-20
cg22813950	chr12	130645566	FZD10	TSS1500			Island	0.239144	4.21823e-14
cg08424446	chr12	133381374	GOLGA3	Body			S_Shelf	-0.25226	3.23675e-18
cg21115608	chr13	20735860	GJA3	TSS1500		TRUE	Island	0.212918	4.5612e-15
cg15205636	chr13	21520468					Island	0.207218	2.24487e-15
cg18252616	chr13	22243392					Island	0.234329	5.84487e-20
cg06001519	chr13	23500838					Island	0.284851	1.27833e-19
cg04865180	chr13	23734385			TRUE		Island	0.248732	1.49227e-16
cg09076334	chr13	24477870					Island	0.285407	9.83337e-23
cg09473359	chr13	24477933					Island	0.200431	7.41641e-19
cg17537073	chr13	24902500					Island	0.305777	3.29137e-17
cg00742920	chr13	27050512			TRUE		OpenSea	0.211853	1.01416e-16
cg19005168	chr13	27092836			TRUE		OpenSea	0.215205	4.83379e-24
cg13799919	chr13	28212848	POLR1D	Body	TRUE		OpenSea	0.215396	6.16524e-20
cg02807859	chr13	28350407			TRUE		OpenSea	0.217999	5.75824e-17
cg02067712	chr13	28364724			TRUE		N_Shore	0.208348	1.26107e-19
cg05967403	chr13	28367245	GSX1	Body			Island	0.203566	2.35208e-18
cg26299169	chr13	28498956	PDX1	3'UTR			Island	0.248818	3.45605e-15
cg00889398	chr13	28502089			TRUE		Island	0.239685	1.43703e-19
cg22396555	chr13	28502461			TRUE		Island	0.21949	1.2119e-20
cg21963436	chr13	28541142	CDX2	Body			Island	0.213498	6.57523e-16
cg26677584	chr13	28541468	CDX2	Body			N_Shore	0.258284	8.19064e-19
cg12440549	chr13	28541477	CDX2	Body			N_Shore	0.284469	5.31755e-19
cg07984133	chr13	28544592	CDX2	TSS1500			Island	0.259371	5.02749e-18
cg16201038	chr13	28544760	CDX2	TSS1500	TRUE		Island	0.232346	6.53078e-17
cg12634080	chr13	28549922					Island	0.208968	1.24565e-16
cg03465513	chr13	28550046					Island	0.216047	6.15405e-17
cg23558002	chr13	28553501	PRHOXNB	Body	TRUE		N_Shore	0.201618	2.91441e-15
cg08380556	chr13	31020218			TRUE	TRUE	S_Shore	0.212721	6.18186e-16
cg17180284	chr13	31783983	B3GALTL	Body	TRUE	TRUE	OpenSea	0.219679	1.6415e-21
cg01373189	chr13	33002820	N4BP2L1	TSS1500			S_Shore	0.251131	4.30122e-27
cg00944193	chr13	36044860	NBEA	Body			Island	0.210867	1.1938e-17
cg07200348	chr13	36045201	NBEA	Body			Island	0.214051	2.55049e-15
cg00762613	chr13	36045224	NBEA	Body			Island	0.214239	1.12736e-14
cg12638731	chr13	36045281	NBEA	Body			Island	0.235071	2.56914e-18
cg18282455	chr13	36729109					Island	0.242792	1.13888e-21
cg16068263	chr13	36729231					Island	0.255903	3.45459e-21
cg10558887	chr13	36919409	SPG20	5'UTR			N_Shore	0.250718	1.37148e-17
cg20691205	chr13	36919674	SPG20	5'UTR			N_Shore	0.251251	8.3894e-20
cg03966514	chr13	36919738	SPG20	5'UTR			Island	0.306711	1.13731e-17
cg01404317	chr13	36919819	SPG20	5'UTR			Island	0.295863	6.59511e-21
cg18755783	chr13	36919905	SPG20	5'UTR			Island	0.284948	1.1819e-17
cg00947032	chr13	36919960	SPG20	5'UTR			Island	0.295884	1.49989e-19
cg13060997	chr13	37006611	CCNA1	5'UTR		TRUE	S_Shore	0.214398	4.25945e-15
cg25217100	chr13	37249426	C13orf36	5'UTR			S_Shore	0.216955	2.10338e-17
cg21476299	chr13	43148214	TNFSF11	TSS200			N_Shore	0.204557	1.23254e-17
cg00880018	chr13	43149171	TNFSF11	Body	TRUE		Island	0.233156	1.41525e-16
cg25261228	chr13	43566114	EPSTI1	1stExon	TRUE	TRUE	Island	0.216587	1.60281e-14
cg14539231	chr13	43566262	EPSTI1	1stExon	TRUE	TRUE	Island	0.278104	1.17376e-15
cg00338116	chr13	43566313	EPSTI1	5'UTR	TRUE	TRUE	Island	0.23363	1.80146e-15
cg22905097	chr13	43566401	EPSTI1	TSS200	TRUE	TRUE	Island	0.279772	2.52607e-15
cg19915711	chr13	43566421	EPSTI1	TSS200	TRUE	TRUE	Island	0.317089	5.19423e-17
cg22125968	chr13	43566472	EPSTI1	TSS200	TRUE	TRUE	Island	0.306523	8.44426e-15
cg01536987	chr13	43566492	EPSTI1	TSS200	TRUE	TRUE	Island	0.304216	4.499e-15
cg18882819	chr13	43566496	EPSTI1	TSS200	TRUE	TRUE	Island	0.274495	8.10957e-16
cg03478249	chr13	43566547	EPSTI1	TSS200	TRUE	TRUE	S_Shore	0.276935	1.24867e-15
cg12138678	chr13	43566618	EPSTI1	TSS1500	TRUE		S_Shore	0.243432	4.14724e-18
cg04308040	chr13	44942303			TRUE		OpenSea	0.226515	4.59472e-21
cg06807397	chr13	44948413	SERP2	Body		TRUE	Island	0.234662	1.16514e-20
cg20483324	chr13	46189838	FAM194B	5'UTR	TRUE		OpenSea	0.26072	1.6111e-18
cg17241776	chr13	51417469	DLEU7	1stExon			Island	0.298635	5.89242e-18
cg20170533	chr13	51417846	DLEU7	1stExon			Island	0.219035	1.36985e-15
cg09557313	chr13	53313174	LECT1	Body	TRUE	TRUE	Island	0.243098	1.6385e-18
cg08567279	chr13	53313529	LECT1	Body	TRUE	TRUE	Island	0.236475	3.07406e-14
cg00708598	chr13	53313895	LECT1	1stExon			Island	0.208981	1.39896e-16
cg23004758	chr13	58204221				TRUE	Island	0.20427	2.10605e-16
cg20634967	chr13	58204224				TRUE	Island	0.244807	2.97277e-14
cg25514273	chr13	70681804	KLHL1	1stExon	TRUE		Island	0.23669	3.29646e-19
cg20523861	chr13	70682324	KLHL1	1stExon			S_Shore	0.261876	7.28123e-20
cg20658100	chr13	74707145	KLF12	5'UTR			N_Shore	0.258437	2.18965e-23
cg13696283	chr13	74707153	KLF12	5'UTR			N_Shore	0.328637	4.6067e-23
cg26419656	chr13	74707400	KLF12	5'UTR			N_Shore	0.277424	5.45771e-21
cg23619399	chr13	79169753					N_Shore	0.220392	1.68293e-18
cg26132774	chr13	79170146			TRUE	TRUE	Island	0.273996	3.1596e-17
cg24221648	chr13	79170283			TRUE	TRUE	Island	0.222127	2.42294e-17
cg15126179	chr13	79181338					Island	0.207965	1.16428e-16
cg22369786	chr13	80911626	SPRY2	Body			N_Shore	0.265103	5.04436e-18
cg13054007	chr13	81018323			TRUE		OpenSea	-0.217401	3.07697e-22
cg07104706	chr13	84456127	SLITRK1	1stExon			S_Shelf	0.202256	1.40124e-14
cg11134334	chr13	94822726	GPC6	Body	TRUE		OpenSea	0.206611	6.33899e-24
cg01470551	chr13	95620874					Island	0.326994	1.24477e-22
cg26163458	chr13	95620976					Island	0.249033	2.10797e-18
cg18107232	chr13	95620997					S_Shore	0.284515	1.29281e-20
cg16232183	chr13	96204854	CLDN10	TSS200		TRUE	Island	0.255086	2.73018e-17
cg06428163	chr13	96204856	CLDN10	TSS200			Island	0.242947	2.59108e-15
cg04603730	chr13	96204870	CLDN10	TSS200		TRUE	Island	0.267361	5.24021e-15
cg09469554	chr13	96204917	CLDN10	TSS200		TRUE	Island	0.287564	9.19806e-17
cg25032595	chr13	96204978	CLDN10	5'UTR		TRUE	Island	0.308084	3.3146e-16
cg16556145	chr13	96205184	CLDN10	1stExon		TRUE	Island	0.226715	3.38231e-15
cg18393747	chr13	96205295	CLDN10	Body		TRUE	Island	0.24057	6.1758e-16
cg19647813	chr13	96296144	DZIP1	5'UTR		TRUE	Island	0.238858	1.94515e-25
cg00158308	chr13	97646341	OXGR1	5'UTR	TRUE		N_Shore	0.309994	7.51684e-23
cg03371199	chr13	97646639	OXGR1	TSS200	TRUE		Island	0.205778	8.4751e-15
cg13990092	chr13	97646731	OXGR1	TSS200	TRUE		Island	0.274822	4.98241e-14
cg22996489	chr13	97646736	OXGR1	TSS200	TRUE		Island	0.266043	4.10552e-14
cg18956714	chr13	97646803	OXGR1	TSS200	TRUE		S_Shore	0.211062	1.91029e-15
cg23037133	chr13	97646811	OXGR1	TSS1500	TRUE		S_Shore	0.220165	1.34665e-16
cg24663970	chr13	97647084	OXGR1	TSS1500	TRUE		S_Shore	0.271705	6.22701e-17
cg00221494	chr13	98794593	FARP1	TSS1500			Island	0.231666	1.07047e-16
cg05621157	chr13	99404279	SLC15A1	Body	TRUE	TRUE	N_Shore	0.232705	9.47145e-16
cg14684709	chr13	100547249	CLYBL	3'UTR			Island	0.259429	1.73021e-14
cg00743094	chr13	100547968	CLYBL	3'UTR			Island	0.256935	1.23564e-15
cg07931391	chr13	100608263			TRUE	TRUE	Island	0.353001	7.78692e-16
cg04579493	chr13	100609947					N_Shore	0.247048	2.5937e-16
cg18557131	chr13	100624207	ZIC5	TSS200			Island	0.219215	9.95544e-16
cg16033633	chr13	100624855	ZIC5	TSS1500			S_Shore	0.202184	3.78219e-17
cg21100077	chr13	100627366					S_Shelf	0.204645	5.41704e-16
cg18161327	chr13	100627703					S_Shelf	0.2479	1.33904e-18
cg20374595	chr13	100627956					N_Shelf	0.23082	7.28002e-22
cg17882660	chr13	100637258	ZIC2	Body			Island	0.219841	3.88993e-14
cg00295794	chr13	100641409					Island	0.30547	2.20946e-17
cg18008019	chr13	100641646					Island	0.231422	6.66214e-20
cg25334575	chr13	100641744					Island	0.236388	1.10506e-18
cg19385331	chr13	100641867					Island	0.229753	1.09633e-18
cg12821539	chr13	100642775			TRUE		Island	0.245166	2.64617e-16
cg12438547	chr13	100642971			TRUE		Island	0.211761	9.24336e-17
cg04370314	chr13	100643312					S_Shore	0.245797	2.04435e-15
cg22489321	chr13	100643388					S_Shore	0.272498	6.93869e-21
cg13436155	chr13	100644217					S_Shore	0.214075	1.30245e-19
cg11694262	chr13	100644657					S_Shore	0.21598	1.20364e-14
cg01528028	chr13	100649800					Island	0.217281	2.01955e-18
cg25810247	chr13	108867154	LIG4	5'UTR			Island	0.225976	1.63087e-14
cg20945738	chr13	108922032	TNFSF13B	5'UTR	TRUE		OpenSea	0.210146	1.18536e-20
cg18703238	chr13	108922361	TNFSF13B	1stExon	TRUE		OpenSea	0.203598	1.64175e-18
cg09450063	chr13	108922504	TNFSF13B	1stExon	TRUE		OpenSea	0.212431	7.39416e-21
cg15292275	chr13	109149011					Island	0.259268	5.96433e-19
cg07647726	chr13	109149171					S_Shore	0.261349	3.69186e-21
cg09168153	chr13	110779117			TRUE	TRUE	OpenSea	0.203665	9.79652e-21
cg07502829	chr13	112708288					Island	0.210667	1.42639e-18
cg09797337	chr13	112709538			TRUE		N_Shore	0.227036	2.56907e-15
cg23619365	chr13	112712009					Island	0.272682	3.64828e-15
cg03276408	chr13	112712475					Island	0.200629	3.11714e-19
cg26751356	chr13	112712635			TRUE		Island	0.230653	2.29856e-17
cg16705627	chr13	112721950	SOX1	1stExon			Island	0.257073	9.05231e-18
cg15415452	chr13	112759355					Island	0.217398	2.76242e-16
cg13692446	chr13	112759719					Island	0.204561	1.15895e-16
cg17296589	chr13	113366074	ATP11A	Body	TRUE		OpenSea	0.225955	1.50233e-18
cg19028462	chr13	113677628	MCF2L	Body		TRUE	Island	0.208918	5.68932e-17
cg09714458	chr13	113807560			TRUE		Island	0.253634	3.68757e-15
cg16820615	chr13	114884918	RASA3	Body		TRUE	OpenSea	0.220718	8.07924e-16
cg11570367	chr13	114896683	RASA3	Body			N_Shore	0.303121	1.52868e-15
cg26786795	chr14	20344394	OR4K2	TSS200			OpenSea	0.251913	7.08893e-22
cg14262740	chr14	20612220	OR4N5	1stExon			OpenSea	0.205829	3.49084e-19
cg02852670	chr14	20903410	KLHL33	5'UTR	TRUE		Island	0.228846	4.50029e-20
cg10982443	chr14	20903611	KLHL33	5'UTR	TRUE		Island	0.250255	1.50365e-18
cg23552977	chr14	21492433	NDRG2	5'UTR		TRUE	N_Shore	0.201701	1.24345e-19
cg20902783	chr14	21494071	NDRG2	TSS1500		TRUE	Island	0.264594	1.16774e-24
cg18081258	chr14	21494161	NDRG2	TSS1500		TRUE	Island	0.260257	5.1752e-26
cg16082336	chr14	21539712	FLJ10357	Body			Island	0.202645	1.95612e-17
cg26066597	chr14	21540022	FLJ10357	Body			Island	0.277362	6.22362e-24
cg18575809	chr14	21540329	FLJ10357	Body			S_Shore	0.237089	2.21433e-21
cg00800229	chr14	22004993	SALL2	1stExon	TRUE		OpenSea	0.327975	8.49495e-24
cg21876626	chr14	22005045	SALL2	1stExon	TRUE		OpenSea	0.246809	9.23807e-25
cg01897797	chr14	22005140	SALL2	5'UTR	TRUE		OpenSea	0.330222	3.22345e-25
cg22921760	chr14	22005368	SALL2	TSS200	TRUE		OpenSea	0.214806	1.56599e-25
cg16304521	chr14	22191827					OpenSea	0.209541	2.10038e-19
cg19846667	chr14	22191856					OpenSea	0.230271	3.28413e-18
cg01508380	chr14	23305585	MMP14	TSS1500			N_Shore	0.234272	3.79201e-17
cg10418289	chr14	23308294	MMP14	Body			S_Shore	0.205381	4.26072e-22
cg14920289	chr14	23821149	SLC22A17	Body		TRUE	Island	0.210587	1.11802e-14
cg17199325	chr14	23821229	SLC22A17	Body			Island	0.218566	3.78276e-14
cg17606785	chr14	23834808	EFS	1stExon			Island	0.215687	3.85169e-17
cg11840125	chr14	23834860	EFS	TSS200			Island	0.223208	1.96818e-17
cg13011388	chr14	23834909	EFS	TSS200			Island	0.28943	9.45202e-15
cg18844382	chr14	23834977	EFS	TSS200			Island	0.309836	5.86764e-19
cg21013866	chr14	23834985	EFS	TSS200			Island	0.306987	3.38453e-15
cg02213260	chr14	23834995	EFS	TSS200			Island	0.207415	3.30831e-19
cg16585972	chr14	23835212	EFS	TSS1500			Island	0.251052	5.53759e-18
cg17205324	chr14	23835595	EFS	TSS1500			Island	0.227179	5.96405e-24
cg18454133	chr14	23835870	EFS	TSS1500			Island	0.270957	2.53002e-23
cg07197059	chr14	23836012	EFS	TSS1500			S_Shore	0.230936	7.80393e-20
cg26206183	chr14	24457993	DHRS4L2	TSS200			Island	0.302915	1.67829e-15
cg13555354	chr14	24458014	DHRS4L2	TSS200			Island	0.35759	2.2177e-15
cg01597387	chr14	24458208	DHRS4L2	1stExon			S_Shore	0.23899	5.09281e-15
cg18556834	chr14	24641070	REC8	TSS200		TRUE	Island	0.237204	6.19562e-21
cg19989295	chr14	24641077	REC8	TSS200		TRUE	Island	0.276966	6.96814e-24
cg18534491	chr14	24641155	REC8	TSS200		TRUE	Island	0.231332	2.30642e-25
cg03431846	chr14	24641183	REC8	TSS200			Island	0.237995	1.14747e-21
cg18628371	chr14	24641189	REC8	TSS200		TRUE	Island	0.267263	7.0338e-23
cg16425038	chr14	24641194	REC8	TSS200		TRUE	Island	0.307974	9.20457e-22
cg07516252	chr14	24641201	REC8	TSS200		TRUE	Island	0.219449	1.35702e-20
cg07485357	chr14	24803679	ADCY4	Body			Island	0.204638	1.11371e-17
cg16761581	chr14	24803807	ADCY4	1stExon			Island	0.300401	1.44038e-20
cg23179456	chr14	24803873	ADCY4	TSS200			Island	0.389501	1.24191e-19
cg13631572	chr14	24803903	ADCY4	TSS200			Island	0.243325	1.96847e-21
cg16215203	chr14	24803917	ADCY4	TSS200			Island	0.2839	3.25756e-22
cg25556905	chr14	24803925	ADCY4	TSS200			Island	0.376443	2.37504e-22
cg12265829	chr14	24804022	ADCY4	TSS200			Island	0.298113	2.37605e-20
cg05031016	chr14	24804153	ADCY4	TSS1500			Island	0.282886	2.73278e-20
cg14287235	chr14	24804339	ADCY4	TSS1500			Island	0.32453	1.46716e-23
cg19646112	chr14	24804342	ADCY4	TSS1500			Island	0.264594	3.50862e-22
cg13066043	chr14	24808987	RIPK3	Body			Island	0.250973	6.15153e-19
cg20822579	chr14	24809073	RIPK3	5'UTR			S_Shore	0.207745	6.48508e-19
cg12177793	chr14	24837892	NFATC4	Body			Island	0.30121	2.96835e-19
cg26009486	chr14	24838008	NFATC4	Body			Island	0.241276	1.0121e-22
cg01233722	chr14	24838126	NFATC4	Body			Island	0.218173	2.57804e-17
cg08282145	chr14	24868755	NYNRIN	Body	TRUE		S_Shore	0.207102	8.6191e-24
cg08273957	chr14	29227941					OpenSea	0.224953	4.76856e-17
cg07974473	chr14	29235092	FOXG1	TSS1500	TRUE		Island	0.215709	6.50136e-20
cg23191956	chr14	29235123	FOXG1	TSS1500	TRUE		Island	0.238547	1.25605e-18
cg25078444	chr14	29235193	FOXG1	TSS1500	TRUE		Island	0.255999	3.41824e-16
cg16038120	chr14	29235196	FOXG1	TSS1500	TRUE		Island	0.251547	1.19961e-16
cg05872306	chr14	29236535	FOXG1	1stExon			N_Shore	0.214321	3.0656e-16
cg07489048	chr14	29236898	FOXG1	1stExon			Island	0.231512	1.18383e-14
cg21195256	chr14	29244278	C14orf23	Body	TRUE		S_Shore	0.261512	6.16081e-15
cg01302656	chr14	29254853	C14orf23	Body			Island	0.200084	2.03325e-17
cg14006181	chr14	29254942	C14orf23	Body			Island	0.263883	4.10009e-21
cg11226913	chr14	29254961	C14orf23	Body			Island	0.225706	2.17386e-19
cg07019438	chr14	34419546	EGLN3	Body			Island	0.252942	2.25629e-14
cg25027125	chr14	35182801	CFL2	Body			N_Shore	0.201802	6.81092e-20
cg08086724	chr14	36973204	SFTA3	Body			Island	0.220917	3.68224e-18
cg13209481	chr14	36973483	SFTA3	Body			Island	0.226882	5.86314e-17
cg13012916	chr14	36973691	SFTA3	Body			Island	0.263239	7.59941e-17
cg23929344	chr14	36975402	SFTA3	Body			Island	0.203307	1.16606e-15
cg14112075	chr14	36977818	SFTA3	Body	TRUE		Island	0.200595	4.17474e-16
cg20000562	chr14	36978633	SFTA3	Body	TRUE		S_Shore	0.232329	1.49883e-19
cg04926361	chr14	36982447	SFTA3	5'UTR			N_Shore	0.225351	1.55799e-20
cg27294268	chr14	36983518	SFTA3	TSS1500	TRUE		Island	0.215318	6.78869e-17
cg05372242	chr14	36983542	SFTA3	TSS1500	TRUE		Island	0.223385	3.36684e-17
cg04330513	chr14	36983694	SFTA3	TSS1500	TRUE		Island	0.235083	3.07361e-16
cg09307564	chr14	36983737	SFTA3	TSS1500	TRUE		Island	0.230079	2.11206e-18
cg07345734	chr14	36986363	NKX2-1	3'UTR			Island	0.255049	3.90776e-15
cg23906738	chr14	36987301	NKX2-1	Body			Island	0.250386	9.69986e-15
cg01630690	chr14	36992001					Island	0.250861	1.91383e-18
cg04224064	chr14	36992233					Island	0.340041	2.44088e-21
cg18468354	chr14	36993517			TRUE		Island	0.234541	3.22864e-17
cg01075271	chr14	38080314			TRUE		Island	0.201719	8.88485e-17
cg23248887	chr14	38679643	SSTR1	Body		TRUE	Island	0.32036	9.89893e-19
cg07471943	chr14	38679656	SSTR1	Body		TRUE	Island	0.200666	2.05143e-18
cg04265797	chr14	38679952	SSTR1	3'UTR		TRUE	Island	0.201736	2.57664e-18
cg04573550	chr14	38680313	SSTR1	3'UTR		TRUE	Island	0.250779	4.64226e-19
cg16190266	chr14	38680855	SSTR1	3'UTR			Island	0.244553	1.52988e-19
cg16404157	chr14	38724648	CLEC14A	1stExon	TRUE		Island	0.267917	5.4863e-17
cg05057720	chr14	38724675	CLEC14A	1stExon	TRUE		Island	0.328838	2.87853e-18
cg23288059	chr14	38724945	CLEC14A	1stExon	TRUE		Island	0.212739	1.5371e-20
cg10996258	chr14	38975251			TRUE		OpenSea	0.213522	2.99383e-20
cg10327400	chr14	42075406	LRFN5	TSS1500			N_Shore	0.204957	3.8133e-18
cg02454806	chr14	42075554	LRFN5	TSS1500			N_Shore	0.234615	3.40736e-21
cg18856581	chr14	48145000	MDGA2	TSS1500			Island	0.214873	3.74624e-15
cg05309989	chr14	50527872			TRUE	TRUE	OpenSea	0.255245	6.75979e-24
cg08572565	chr14	51298737	NIN	TSS1500			S_Shore	0.205572	2.3977e-16
cg01270593	chr14	51339072	ABHD12B	5'UTR			Island	0.201479	1.44834e-16
cg17347389	chr14	51562646	TRIM9	TSS1500			S_Shore	0.224062	4.87224e-17
cg21929473	chr14	51862102			TRUE		OpenSea	0.20095	1.54274e-22
cg09841842	chr14	51974848	FRMD6	5'UTR	TRUE		OpenSea	0.271577	6.27479e-24
cg04701034	chr14	52536175	NID2	TSS1500		TRUE	Island	0.242913	1.44085e-14
cg16695483	chr14	52536436	NID2	TSS1500		TRUE	Island	0.209273	4.65932e-14
cg20297199	chr14	54422775	BMP4	5'UTR		TRUE	Island	0.226156	2.49833e-16
cg08162372	chr14	54422925	BMP4	5'UTR		TRUE	Island	0.271013	1.59098e-16
cg16379462	chr14	55119082	SAMD4A	Body	TRUE	TRUE	OpenSea	0.242404	1.39314e-19
cg00107772	chr14	57261886					Island	0.247851	2.57436e-18
cg08235161	chr14	57262049				TRUE	Island	0.254545	1.63025e-20
cg21106407	chr14	57262177				TRUE	S_Shore	0.276672	1.64571e-20
cg02237629	chr14	57264095					N_Shore	0.239007	4.4742e-19
cg19871940	chr14	57264287					N_Shore	0.31451	4.01806e-18
cg18479593	chr14	57265560					Island	0.239579	2.70347e-16
cg27122213	chr14	57274763	OTX2	5'UTR			Island	0.217431	1.17796e-17
cg13023623	chr14	57276257	OTX2	5'UTR			Island	0.264444	2.29667e-17
cg06966811	chr14	57276789	OTX2	5'UTR			Island	0.202522	1.44141e-20
cg16793394	chr14	57278084	OTX2	TSS1500			Island	0.200032	5.3681e-16
cg18451814	chr14	57278188	OTX2	TSS1500			Island	0.229321	2.36119e-18
cg09624466	chr14	57278710	OTX2OS1	TSS1500			Island	0.236173	1.68617e-15
cg21039708	chr14	57278729	OTX2OS1	TSS1500			Island	0.312326	5.79744e-16
cg25092838	chr14	57279115	OTX2OS1	TSS1500			Island	0.242818	3.07425e-14
cg04548856	chr14	57284528	OTX2OS1	Body			Island	0.23521	1.56442e-20
cg21141024	chr14	59422098			TRUE		OpenSea	0.220671	9.39333e-20
cg21026830	chr14	60973517					N_Shore	0.277766	2.08832e-16
cg13539545	chr14	60973823			TRUE		Island	0.302489	4.93231e-18
cg24736989	chr14	60973904			TRUE		Island	0.209106	3.01104e-15
cg10755235	chr14	60974039			TRUE		Island	0.212068	2.4111e-16
cg19456540	chr14	60976285	SIX6	1stExon	TRUE		Island	0.21396	4.26644e-14
cg12091642	chr14	61104566				TRUE	Island	0.231332	1.12443e-14
cg26236177	chr14	61110649					S_Shore	0.238062	1.80056e-19
cg14007871	chr14	61120134					N_Shelf	0.24429	2.20209e-16
cg14272084	chr14	61685564			TRUE		OpenSea	0.232421	8.09991e-18
cg01779765	chr14	62583795	FLJ43390	TSS1500			Island	0.257679	9.23482e-19
cg19841369	chr14	64663928	SYNE2	Body			OpenSea	0.203386	1.89013e-20
cg21927177	chr14	65172436	PLEKHG3	5'UTR			S_Shore	0.262582	4.81921e-25
cg23373640	chr14	65696480			TRUE		OpenSea	0.20163	4.72093e-18
cg05315321	chr14	68844276	RAD51L1	Body	TRUE		OpenSea	0.235198	1.03702e-23
cg10968631	chr14	69986021	FLJ44817	Body	TRUE		OpenSea	0.200047	4.78367e-21
cg16565031	chr14	70186289			TRUE	TRUE	OpenSea	0.202002	8.90305e-20
cg16709294	chr14	70235567	SFRS5	Body			S_Shore	-0.227916	2.95738e-21
cg10848272	chr14	70653719	SLC8A3	5'UTR			N_Shore	0.2439	2.08849e-19
cg00890485	chr14	70653919	SLC8A3	5'UTR		TRUE	N_Shore	0.322077	1.40558e-23
cg23241781	chr14	70653964	SLC8A3	5'UTR		TRUE	N_Shore	0.37489	4.48743e-22
cg19545232	chr14	70654247	SLC8A3	5'UTR		TRUE	N_Shore	0.280475	6.48738e-24
cg01646639	chr14	70654290	SLC8A3	5'UTR		TRUE	N_Shore	0.21429	1.10801e-20
cg02058870	chr14	72053146	SIPA1L1	5'UTR	TRUE		OpenSea	0.260029	5.13523e-19
cg09636214	chr14	73712491	PAPLN	Body			Island	0.219263	4.99303e-18
cg15416329	chr14	74706016	VSX2	TSS200		TRUE	N_Shore	0.243642	2.67375e-20
cg07573727	chr14	74706196	VSX2	5'UTR		TRUE	Island	0.237199	1.35562e-21
cg27317046	chr14	74968209	LTBP2	Body	TRUE	TRUE	OpenSea	0.237272	1.55544e-16
cg10101773	chr14	75894136	JDP2	TSS1500			N_Shore	0.322749	3.28305e-22
cg02114084	chr14	75894209	JDP2	TSS1500			N_Shore	0.213498	4.15622e-21
cg18322546	chr14	77422738			TRUE		N_Shore	0.225806	1.76181e-22
cg16324314	chr14	77480847			TRUE		OpenSea	0.217217	1.01367e-19
cg13038685	chr14	77504478			TRUE		OpenSea	0.239993	3.84213e-23
cg22930859	chr14	78108189			TRUE	TRUE	Island	0.224832	7.03805e-19
cg13833923	chr14	79746627	NRXN3	Body			S_Shore	0.21686	2.23471e-16
cg01537995	chr14	85996352	FLRT2	TSS200			N_Shore	0.266491	5.50847e-22
cg16800165	chr14	85996364	FLRT2	TSS200			N_Shore	0.269433	8.22122e-23
cg17410236	chr14	85996495	FLRT2	1stExon			Island	0.248097	8.65036e-17
cg01711160	chr14	85996499	FLRT2	1stExon			Island	0.274647	2.9529e-19
cg18070676	chr14	85997519	FLRT2	5'UTR		TRUE	Island	0.2774	6.08149e-22
cg03506640	chr14	85997753	FLRT2	5'UTR		TRUE	Island	0.226608	1.36669e-17
cg18103730	chr14	88458917	GALC	Body			N_Shore	0.200143	1.0096e-17
cg07072475	chr14	90850234					Island	0.202899	1.26177e-14
cg06907680	chr14	91580129	C14orf159	TSS1500			OpenSea	0.229394	9.37995e-18
cg26288577	chr14	91580429	C14orf159	1stExon		TRUE	OpenSea	0.258715	8.0628e-16
cg13186286	chr14	91580451	C14orf159	1stExon		TRUE	OpenSea	0.220725	8.29754e-15
cg18639180	chr14	91580605	C14orf159	1stExon	TRUE	TRUE	OpenSea	0.227787	2.8399e-15
cg23296408	chr14	91580613	C14orf159	1stExon	TRUE	TRUE	OpenSea	0.237505	7.34682e-15
cg07063068	chr14	91711033	GPR68	5'UTR		TRUE	OpenSea	0.206452	5.75718e-18
cg10497871	chr14	92041114	C14orf184	5'UTR	TRUE	TRUE	S_Shore	0.20265	1.09814e-16
cg07575518	chr14	92413497	FBLN5	Body		TRUE	N_Shore	0.270899	7.8759e-20
cg21883802	chr14	92413706	FBLN5	5'UTR		TRUE	Island	0.301234	3.43595e-17
cg19767131	chr14	92979698	RIN3	TSS1500		TRUE	N_Shore	0.24161	1.25161e-17
cg12169365	chr14	92979709	RIN3	TSS1500		TRUE	N_Shore	0.221528	2.33989e-16
cg20895877	chr14	94254586	PRIMA1	5'UTR		TRUE	Island	0.290113	3.38888e-14
cg10002178	chr14	94254726	PRIMA1	5'UTR		TRUE	Island	0.349742	2.99099e-17
cg19630689	chr14	94984381	SERPINA12	TSS1500	TRUE		OpenSea	0.227048	9.84911e-23
cg19904425	chr14	94984530	SERPINA12	TSS1500			OpenSea	0.201723	1.10662e-19
cg13073773	chr14	95234658	GSC	3'UTR	TRUE		Island	0.205065	1.7873e-14
cg23695707	chr14	95234826	GSC	3'UTR	TRUE		Island	0.200647	3.60953e-16
cg18687675	chr14	95234965	GSC	Body	TRUE	TRUE	Island	0.209251	1.06736e-15
cg02948476	chr14	95235026	GSC	Body	TRUE	TRUE	Island	0.241857	5.52823e-17
cg01163842	chr14	95235125	GSC	Body	TRUE	TRUE	Island	0.298018	4.82246e-14
cg07785447	chr14	95235127	GSC	Body	TRUE		Island	0.253994	6.39406e-15
cg21063282	chr14	95235402	GSC	Body	TRUE	TRUE	Island	0.252249	8.48692e-16
cg01533258	chr14	95235489	GSC	Body	TRUE	TRUE	Island	0.23592	6.07927e-15
cg04932340	chr14	95239381					Island	0.210174	1.38615e-16
cg19870698	chr14	95239570					Island	0.271009	1.48417e-16
cg01796166	chr14	95239586					Island	0.241116	6.16951e-16
cg08196032	chr14	95239751					N_Shore	0.234908	5.50608e-18
cg10746936	chr14	95240143					Island	0.26063	3.42383e-19
cg14943113	chr14	95240444			TRUE		S_Shore	0.205331	9.94206e-17
cg24034005	chr14	97059192			TRUE	TRUE	Island	0.269707	1.43625e-14
cg01683794	chr14	97059349			TRUE	TRUE	Island	0.216965	5.9462e-19
cg19567689	chr14	97059467			TRUE		Island	0.208916	9.15229e-18
cg04958794	chr14	97685274					Island	0.213128	1.16349e-19
cg24674368	chr14	97879637					OpenSea	0.231424	5.68691e-16
cg12961080	chr14	99736143	BCL11B	Body			Island	0.238144	5.09807e-17
cg24683041	chr14	100413076				TRUE	OpenSea	0.201088	2.29682e-20
cg23997405	chr14	101033689	BEGAIN	Body	TRUE		N_Shore	0.358061	2.53227e-28
cg01590338	chr14	101831332					Island	0.20157	1.53454e-14
cg13797425	chr14	102554977	HSP90AA1	TSS1500			S_Shore	0.238721	1.7278e-16
cg25577023	chr14	103394899	AMN	Body			Island	0.205717	6.22193e-17
cg15827779	chr14	103524899	CDC42BPB	TSS1500			S_Shore	0.276123	1.93977e-21
cg24779941	chr14	103524901	CDC42BPB	TSS1500			S_Shore	0.235994	1.57423e-19
cg18927077	chr14	103605358					Island	0.263607	1.16947e-20
cg01363714	chr14	103655773					Island	0.242519	3.44867e-16
cg17275781	chr14	103740085			TRUE		Island	0.214964	1.46795e-15
cg01121022	chr14	104338788			TRUE	TRUE	OpenSea	0.217539	5.07441e-15
cg21091128	chr14	104583799	MIR203	Body		TRUE	Island	0.258927	2.79881e-17
cg14361409	chr14	104584098					Island	0.283555	1.63486e-14
cg06858555	chr14	105144735			TRUE		S_Shore	0.2065	8.54193e-20
cg23385208	chr14	105439913	AHNAK2	Body	TRUE	TRUE	OpenSea	0.209903	2.85545e-17
cg07193234	chr15	28341783	OCA2	5'UTR			Island	0.205531	8.6646e-20
cg09792204	chr15	28342183	OCA2	5'UTR			Island	0.273351	1.05308e-21
cg17741501	chr15	29077493				TRUE	Island	0.30028	2.90464e-18
cg15605858	chr15	29395932	APBA2	Body	TRUE	TRUE	Island	0.240875	5.76549e-15
cg09077934	chr15	29407792	APBA2	Body			Island	0.250355	1.23684e-22
cg17716765	chr15	29407853	APBA2	Body		TRUE	Island	0.218631	1.41743e-19
cg20663376	chr15	31372997	TRPM1	5'UTR	TRUE	TRUE	OpenSea	0.212023	1.85697e-17
cg03465028	chr15	31658323	KLF13	Body	TRUE	TRUE	OpenSea	0.211374	4.7999e-14
cg02228815	chr15	31685131					Island	0.214028	2.14731e-24
cg12134633	chr15	32934004	SCG5	5'UTR	TRUE		OpenSea	0.249597	1.13739e-18
cg09656020	chr15	33009409	GREM1	TSS1500		TRUE	N_Shore	0.203104	1.73635e-21
cg18145505	chr15	33009498	GREM1	TSS1500		TRUE	N_Shore	0.247438	9.44517e-18
cg03884132	chr15	33009531	GREM1	TSS1500			Island	0.257177	5.66097e-17
cg08935118	chr15	35014229				TRUE	OpenSea	0.27157	5.67904e-21
cg24922143	chr15	35014270				TRUE	OpenSea	0.397558	2.26405e-22
cg25440893	chr15	35091802			TRUE	TRUE	OpenSea	0.251968	2.13091e-22
cg13181164	chr15	37388828	MEIS2	Body			N_Shore	0.207095	4.33885e-18
cg13181974	chr15	37389489	MEIS2	Body			N_Shore	0.311614	8.34945e-19
cg01958086	chr15	37389951	MEIS2	Body		TRUE	N_Shore	0.24844	4.65514e-18
cg03951374	chr15	37390176	MEIS2	1stExon		TRUE	Island	0.233797	3.16919e-25
cg13800209	chr15	37390284	MEIS2	1stExon		TRUE	Island	0.351025	4.4209e-19
cg07077665	chr15	37395084					S_Shore	0.229124	1.08666e-16
cg20305024	chr15	40575730					Island	0.200873	4.92094e-22
cg12386646	chr15	41787261	ITPKA	Body			Island	0.202425	1.01333e-15
[truncated: 4,169 more rows]

## Sheet: Table S2-GO
Table S2- Gene ontology terms enriched in genes with differentially methylated CpGs
Gene Ontology	Term	Differentially methylated genes in GO	Differentially methylated genes in PCa	Bonferroni corrected p-value
GO:0048731	system development	4536	768	2.47e-79
GO:0007275	multicellular organism development	5091	824	3.38e-76
GO:0048856	anatomical structure development	5554	873	5.3e-76
GO:0032502	developmental process	5955	911	1.85e-73
GO:0007399	nervous system development	2216	467	2.77e-70
GO:0032501	multicellular organismal process	7091	994	6.44e-61
GO:0030154	cell differentiation	3926	642	5.56e-55
GO:0048869	cellular developmental process	4096	658	1.93e-53
GO:0009653	anatomical structure morphogenesis	2476	458	1.05e-50
GO:0022008	neurogenesis	1466	324	1.2e-48
GO:0048699	generation of neurons	1372	310	1.39e-48
GO:0048513	animal organ development	3302	544	1.86e-48
GO:0030182	neuron differentiation	1244	286	3.03e-46
GO:0050793	regulation of developmental process	2396	429	6.76e-45
GO:2000026	regulation of multicellular organismal development	1869	361	1.35e-44
GO:0048468	cell development	1947	378	2.12e-44
GO:0051239	regulation of multicellular organismal process	2826	469	2.41e-40
GO:0045595	regulation of cell differentiation	1676	319	1.41e-37
GO:0023052	signaling	6176	811	8.54e-33
GO:0007417	central nervous system development	896	202	2.63e-32
GO:0007154	cell communication	6195	808	2.28e-31
GO:0040011	locomotion	1674	305	4.11e-31
GO:0006928	movement of cell or subcellular component	1924	334	2.36e-30
GO:0048522	positive regulation of cellular process	4873	664	2.54e-30
GO:0048518	positive regulation of biological process	5465	723	1.43e-29
GO:0048666	neuron development	993	215	2.26e-29
GO:0060284	regulation of cell development	816	186	2.4e-29
GO:0009790	embryo development	949	202	2.83e-29
GO:0007267	cell-cell signaling	1575	288	3.59e-29
GO:0009887	animal organ morphogenesis	986	206	4.21e-29
GO:0009888	tissue development	1899	326	5.09e-29
GO:0051960	regulation of nervous system development	781	181	1.91e-28
GO:0050767	regulation of neurogenesis	691	163	8.92e-27
GO:0051093	negative regulation of developmental process	877	187	4.03e-26
GO:0007423	sensory organ development	517	132	4.4e-26
GO:0022610	biological adhesion	1356	251	2.72e-25
GO:0007155	cell adhesion	1349	250	3.01e-25
GO:0048646	anatomical structure formation involved in morphogenesis	1019	206	3.96e-25
GO:0045596	negative regulation of cell differentiation	643	150	5.59e-25
GO:0001501	skeletal system development	486	125	7.62e-25
GO:0048870	cell motility	1445	258	1.41e-24
GO:0051674	localization of cell	1445	258	1.41e-24
GO:0048598	embryonic morphogenesis	575	137	3.51e-24
GO:0006357	regulation of transcription from RNA polymerase II promoter	1943	316	5.58e-24
GO:0045664	regulation of neuron differentiation	564	138	5.62e-24
GO:0016477	cell migration	1308	237	9e-24
GO:0050794	regulation of cellular process	10277	1181	9.97e-24
GO:0007166	cell surface receptor signaling pathway	2686	401	1.13e-23
GO:0060322	head development	709	159	1.15e-23
GO:0051094	positive regulation of developmental process	1241	230	2.07e-23
GO:0031175	neuron projection development	872	184	3.31e-23
GO:0050789	regulation of biological process	10914	1236	3.61e-23
GO:0048523	negative regulation of cellular process	4571	602	5.92e-23
GO:0045165	cell fate commitment	253	82	1.05e-22
GO:0048568	embryonic organ development	421	110	1.9e-22
GO:0007420	brain development	673	150	2.93e-22
GO:0065007	biological regulation	11512	1288	3.7e-22
GO:0051241	negative regulation of multicellular organismal process	1090	205	4.45e-22
GO:0000902	cell morphogenesis	918	189	4.71e-22
GO:0007389	pattern specification process	420	111	7.98e-22
GO:0007165	signal transduction	5686	718	9.4e-22
GO:0032989	cellular component morphogenesis	1016	202	1.08e-21
GO:0023051	regulation of signaling	3368	474	1.7e-21
GO:0010646	regulation of cell communication	3319	469	1.8e-21
GO:0048858	cell projection morphogenesis	601	142	6.46e-21
GO:0120039	plasma membrane bounded cell projection morphogenesis	598	141	9.78e-21
GO:0045944	positive regulation of transcription from RNA polymerase II promoter	1097	203	1.17e-20
GO:0048667	cell morphogenesis involved in neuron differentiation	525	128	1.98e-20
GO:0048812	neuron projection morphogenesis	584	138	2.22e-20
GO:0048519	negative regulation of biological process	5037	641	2.43e-20
GO:0030030	cell projection organization	1383	243	2.81e-20
GO:0032990	cell part morphogenesis	620	143	4.06e-20
GO:0120036	plasma membrane bounded cell projection organization	1354	238	4.6e-20
GO:0030900	forebrain development	364	99	6.29e-20
GO:0006366	transcription from RNA polymerase II promoter	2132	325	2e-19
GO:0035295	tube development	577	129	3.43e-19
GO:0007409	axonogenesis	430	110	7.2e-19
GO:0061564	axon development	467	116	7.66e-19
GO:0045597	positive regulation of cell differentiation	890	172	9.05e-19
GO:0090596	sensory organ morphogenesis	248	76	1.22e-18
GO:0048562	embryonic organ morphogenesis	282	81	1.43e-18
GO:0022603	regulation of anatomical structure morphogenesis	993	184	2.74e-18
GO:0001654	eye development	341	91	2.9e-18
GO:0000904	cell morphogenesis involved in differentiation	657	143	3e-18
GO:0051270	regulation of cellular component movement	880	166	7.99e-18
GO:0003002	regionalization	331	90	8.73e-18
GO:0010721	negative regulation of cell development	287	80	1.28e-17
GO:0050896	response to stimulus	8334	962	2.01e-17
GO:0009966	regulation of signal transduction	3035	422	3.12e-17
GO:0040012	regulation of locomotion	869	163	1.06e-16
GO:0021953	central nervous system neuron differentiation	171	62	1.08e-16
GO:0051240	positive regulation of multicellular organismal process	1524	247	1.14e-16
GO:0008283	cell proliferation	2002	302	2.01e-16
GO:0043010	camera-type eye development	294	80	5.03e-16
GO:0061061	muscle structure development	631	129	5.32e-16
GO:2000145	regulation of cell motility	802	151	7.27e-16
GO:0030334	regulation of cell migration	749	142	1.62e-15
GO:0072359	circulatory system development	997	177	2.9e-15
GO:0051716	cellular response to stimulus	6961	816	3.67e-15
GO:0051173	positive regulation of nitrogen compound metabolic process	2898	395	3.99e-15
GO:0042127	regulation of cell proliferation	1603	249	4.47e-15
GO:0048762	mesenchymal cell differentiation	189	57	4.73e-15
GO:0032879	regulation of localization	2600	357	6.52e-15
GO:0050768	negative regulation of neurogenesis	246	70	7.38e-15
GO:0008150	biological_process	16502	1682	1.01e-14
GO:0097485	neuron projection guidance	230	68	1.19e-14
GO:0009893	positive regulation of metabolic process	3246	430	1.5e-14
GO:0021537	telencephalon development	236	68	2.45e-14
GO:0048583	regulation of response to stimulus	3860	499	3.41e-14
GO:0010604	positive regulation of macromolecule metabolic process	3012	403	4.57e-14
GO:0031325	positive regulation of cellular metabolic process	3008	401	9.38e-14
GO:0051961	negative regulation of nervous system development	266	72	1.04e-13
GO:0060485	mesenchyme development	241	63	1.08e-13
GO:0045893	positive regulation of transcription, DNA-templated	1408	221	1.09e-13
GO:1903508	positive regulation of nucleic acid-templated transcription	1408	221	1.09e-13
GO:1902680	positive regulation of RNA biosynthetic process	1409	221	1.11e-13
GO:0031344	regulation of cell projection organization	569	118	1.14e-13
GO:0007517	muscle organ development	385	90	1.2e-13
GO:0007411	axon guidance	228	66	1.47e-13
GO:0051962	positive regulation of nervous system development	467	105	1.93e-13
GO:0120035	regulation of plasma membrane bounded cell projection organization	558	115	3.96e-13
GO:0060429	epithelium development	1221	199	5.63e-13
GO:0045935	positive regulation of nucleobase-containing compound metabolic process	1739	256	9.62e-13
GO:0051254	positive regulation of RNA metabolic process	1479	227	9.95e-13
GO:0010628	positive regulation of gene expression	1806	263	1.78e-12
GO:0006935	chemotaxis	573	116	1.98e-12
GO:0042330	taxis	573	116	1.98e-12
GO:0043009	chordate embryonic development	560	111	2.43e-12
GO:0009891	positive regulation of biosynthetic process	1815	261	2.89e-12
GO:0071495	cellular response to endogenous stimulus	1262	200	3.52e-12
GO:0001655	urogenital system development	315	76	4.09e-12
GO:0009792	embryo development ending in birth or egg hatching	565	111	5.4e-12
GO:0031328	positive regulation of cellular biosynthetic process	1786	257	5.56e-12
GO:0048592	eye morphogenesis	144	48	6.71e-12
GO:0048705	skeletal system morphogenesis	209	57	6.75e-12
GO:0061448	connective tissue development	235	62	6.96e-12
GO:0045665	negative regulation of neuron differentiation	192	56	7.84e-12
GO:0072001	renal system development	279	70	1.03e-11
GO:0001822	kidney development	263	67	1.08e-11
GO:0009719	response to endogenous stimulus	1481	222	1.1e-11
GO:0051128	regulation of cellular component organization	2289	315	1.14e-11
GO:0001568	blood vessel development	633	121	1.2e-11
GO:0001525	angiogenesis	463	97	1.61e-11
GO:0050769	positive regulation of neurogenesis	405	91	1.67e-11
GO:0051216	cartilage development	180	51	1.72e-11
GO:0010975	regulation of neuron projection development	415	91	2.2e-11
GO:0009987	cellular process	15098	1554	2.76e-11
GO:0010720	positive regulation of cell development	479	101	2.76e-11
GO:0048706	embryonic skeletal system development	121	41	2.81e-11
GO:0048663	neuron fate commitment	68	32	3.26e-11
GO:0055123	digestive system development	143	43	3.59e-11
GO:0098609	cell-cell adhesion	796	143	4.17e-11
GO:0010557	positive regulation of macromolecule biosynthetic process	1649	238	6.54e-11
GO:0001708	cell fate specification	83	33	7.4e-11
GO:0023056	positive regulation of signaling	1643	238	7.43e-11
GO:0072073	kidney epithelium development	139	45	1.21e-10
GO:0072358	cardiovascular system development	670	123	1.32e-10
GO:0001944	vasculature development	662	122	1.4e-10
GO:0048565	digestive tract development	130	40	1.41e-10
GO:0010647	positive regulation of cell communication	1637	236	1.56e-10
GO:0009952	anterior/posterior pattern specification	202	56	1.63e-10
GO:0048863	stem cell differentiation	256	63	1.65e-10
GO:0070887	cellular response to chemical stimulus	2926	380	1.91e-10
GO:0035239	tube morphogenesis	347	78	2.11e-10
GO:0048585	negative regulation of response to stimulus	1468	222	2.3e-10
GO:0048514	blood vessel morphogenesis	550	106	2.31e-10
GO:0014706	striated muscle tissue development	366	80	2.79e-10
GO:0007167	enzyme linked receptor protein signaling pathway	989	162	2.82e-10
GO:0060537	muscle tissue development	383	83	2.84e-10
GO:0071310	cellular response to organic substance	2411	323	2.97e-10
GO:0001503	ossification	371	79	3.73e-10
GO:0071363	cellular response to growth factor stimulus	639	118	3.84e-10
GO:0030198	extracellular matrix organization	331	75	4.12e-10
GO:0043062	extracellular structure organization	332	75	5.41e-10
GO:0070848	response to growth factor	665	120	6.34e-10
GO:1902679	negative regulation of RNA biosynthetic process	1167	178	8.27e-10
GO:0045892	negative regulation of transcription, DNA-templated	1126	173	9.28e-10
GO:0000122	negative regulation of transcription from RNA polymerase II promoter	786	133	1.23e-09
GO:0045666	positive regulation of neuron differentiation	323	75	1.25e-09
GO:1903507	negative regulation of nucleic acid-templated transcription	1165	177	1.37e-09
GO:0048729	tissue morphogenesis	625	114	1.71e-09
GO:0007610	behavior	570	104	1.93e-09
GO:0001764	neuron migration	139	43	2.31e-09
GO:1905114	cell surface receptor signaling pathway involved in cell-cell signaling	588	107	3e-09
GO:0071772	response to BMP	165	47	3.47e-09
GO:0071773	cellular response to BMP stimulus	165	47	3.47e-09
GO:0008284	positive regulation of cell proliferation	873	142	3.61e-09
GO:0099536	synaptic signaling	605	113	3.7e-09
GO:0099537	trans-synaptic signaling	605	113	3.7e-09
GO:0021515	cell differentiation in spinal cord	52	26	4.54e-09
GO:0007178	transmembrane receptor protein serine/threonine kinase signaling pathway	318	70	5.29e-09
GO:0007268	chemical synaptic transmission	603	112	5.83e-09
GO:0098916	anterograde trans-synaptic signaling	603	112	5.83e-09
GO:0035107	appendage morphogenesis	147	43	6.3e-09
GO:0035108	limb morphogenesis	147	43	6.3e-09
GO:0051179	localization	6205	698	6.58e-09
GO:0010648	negative regulation of cell communication	1283	194	7.24e-09
GO:0021510	spinal cord development	98	36	7.24e-09
GO:0048736	appendage development	171	46	8.68e-09
GO:0060173	limb development	171	46	8.68e-09
GO:0040007	growth	944	151	1.08e-08
GO:0023057	negative regulation of signaling	1287	194	1.31e-08
GO:0090287	regulation of cellular response to growth factor stimulus	252	62	1.35e-08
GO:0030155	regulation of cell adhesion	662	115	1.48e-08
GO:0035270	endocrine system development	127	38	2.25e-08
GO:0048589	developmental growth	591	107	2.86e-08
GO:0048732	gland development	422	80	3.33e-08
GO:0009968	negative regulation of signal transduction	1177	178	4.76e-08
GO:0060562	epithelial tube morphogenesis	310	68	5.39e-08
GO:0003008	system process	1940	263	5.54e-08
GO:0001837	epithelial to mesenchymal transition	133	38	5.9e-08
GO:0065008	regulation of biological quality	3487	425	6.36e-08
GO:0060041	retina development in camera-type eye	138	40	6.65e-08
GO:0090092	regulation of transmembrane receptor protein serine/threonine kinase signaling pathway	215	52	6.89e-08
GO:0021871	forebrain regionalization	24	17	8.39e-08
GO:0022604	regulation of cell morphogenesis	427	85	8.91e-08
GO:0021978	telencephalon regionalization	13	12	8.97e-08
GO:0051253	negative regulation of RNA metabolic process	1242	179	1.06e-07
GO:0001657	ureteric bud development	97	33	1.25e-07
GO:0030509	BMP signaling pathway	153	42	1.41e-07
GO:0072163	mesonephric epithelium development	98	33	1.64e-07
GO:0072164	mesonephric tubule development	98	33	1.64e-07
GO:0007507	heart development	526	95	2.02e-07
GO:0043583	ear development	205	50	2.59e-07
GO:0042221	response to chemical	4207	495	2.81e-07
GO:0007369	gastrulation	182	45	2.84e-07
GO:0043069	negative regulation of programmed cell death	850	133	3.49e-07
GO:0010769	regulation of cell morphogenesis involved in differentiation	254	58	3.89e-07
GO:0009953	dorsal/ventral pattern formation	95	32	4.3e-07
GO:0048584	positive regulation of response to stimulus	2084	271	4.36e-07
GO:0051171	regulation of nitrogen compound metabolic process	5814	665	4.49e-07
GO:0009611	response to wounding	640	108	4.8e-07
GO:0043066	negative regulation of apoptotic process	836	131	4.84e-07
GO:0060548	negative regulation of cell death	931	142	6.58e-07
GO:0010033	response to organic substance	3003	366	6.59e-07
GO:0043067	regulation of programmed cell death	1491	206	6.74e-07
GO:0010941	regulation of cell death	1607	219	7.97e-07
GO:0031589	cell-substrate adhesion	313	65	7.99e-07
GO:0001823	mesonephros development	102	33	8.5e-07
GO:0006355	regulation of transcription, DNA-templated	3531	433	8.6e-07
GO:0003407	neural retina development	59	25	9.93e-07
GO:0045934	negative regulation of nucleobase-containing compound metabolic process	1399	192	1.02e-06
GO:0009967	positive regulation of signal transduction	1501	205	1.08e-06
GO:2001141	regulation of RNA biosynthetic process	3561	435	1.09e-06
GO:0042063	gliogenesis	252	58	1.18e-06
GO:0002009	morphogenesis of an epithelium	520	93	1.19e-06
GO:1903506	regulation of nucleic acid-templated transcription	3553	434	1.28e-06
GO:0065009	regulation of molecular function	3261	396	1.32e-06
GO:0042981	regulation of apoptotic process	1476	203	1.35e-06
GO:0048704	embryonic skeletal system morphogenesis	93	29	1.51e-06
GO:0035556	intracellular signal transduction	2662	333	1.54e-06
GO:0003148	outflow tract septum morphogenesis	25	14	1.55e-06
GO:0051272	positive regulation of cellular component movement	464	84	1.72e-06
GO:2000147	positive regulation of cell motility	451	82	1.81e-06
GO:0021517	ventral spinal cord development	44	21	1.99e-06
GO:0040017	positive regulation of locomotion	481	86	2.12e-06
GO:0044057	regulation of system process	531	93	2.15e-06
GO:0006811	ion transport	1575	215	2.28e-06
GO:0048665	neuron fate specification	33	17	2.47e-06
GO:0048593	camera-type eye morphogenesis	108	34	2.49e-06
GO:0010562	positive regulation of phosphorus metabolic process	1096	163	2.61e-06
GO:0045937	positive regulation of phosphate metabolic process	1096	163	2.61e-06
GO:0031323	regulation of cellular metabolic process	6084	684	2.63e-06
GO:0021872	forebrain generation of neurons	64	25	2.89e-06
GO:0048566	embryonic digestive tract development	35	17	3.02e-06
GO:0031346	positive regulation of cell projection organization	329	68	3.24e-06
GO:0051271	negative regulation of cellular component movement	284	57	3.55e-06
GO:0030029	actin filament-based process	680	111	3.96e-06
GO:0030326	embryonic limb morphogenesis	127	36	3.96e-06
GO:0035113	embryonic appendage morphogenesis	127	36	3.96e-06
GO:0098742	cell-cell adhesion via plasma-membrane adhesion molecules	236	55	3.97e-06
GO:0080090	regulation of primary metabolic process	5963	671	4.83e-06
GO:0051130	positive regulation of cellular component organization	1166	169	4.86e-06
GO:0030335	positive regulation of cell migration	433	78	5.43e-06
GO:0050804	modulation of chemical synaptic transmission	306	63	6.63e-06
GO:0072089	stem cell proliferation	115	36	6.76e-06
GO:0198738	cell-cell signaling by wnt	482	85	7.04e-06
GO:0048534	hematopoietic or lymphoid organ development	855	130	7.08e-06
GO:0043269	regulation of ion transport	623	103	8.79e-06
GO:0051049	regulation of transport	1839	237	9.12e-06
GO:0009605	response to external stimulus	2083	266	9.22e-06
GO:0060348	bone development	184	45	9.45e-06
GO:0010717	regulation of epithelial to mesenchymal transition	84	26	9.87e-06
GO:0048546	digestive tract morphogenesis	50	20	1.05e-05
GO:0006915	apoptotic process	1858	239	1.07e-05
GO:0030510	regulation of BMP signaling pathway	86	28	1.14e-05
GO:0048839	inner ear development	180	44	1.15e-05
GO:0002520	immune system development	898	134	1.33e-05
GO:0050808	synapse organization	259	58	1.36e-05
GO:0016055	Wnt signaling pathway	480	84	1.37e-05
GO:1901861	regulation of muscle tissue development	143	37	1.42e-05
GO:0021987	cerebral cortex development	110	32	1.43e-05
GO:0019222	regulation of metabolic process	6495	717	1.66e-05
GO:0019220	regulation of phosphate metabolic process	1703	228	1.76e-05
GO:0061035	regulation of cartilage development	62	23	1.89e-05
GO:0001932	regulation of protein phosphorylation	1345	189	1.94e-05
GO:0001934	positive regulation of protein phosphorylation	930	139	2.43e-05
GO:0001763	morphogenesis of a branching structure	193	45	2.76e-05
GO:0006468	protein phosphorylation	1880	250	3.11e-05
GO:0042060	wound healing	533	90	3.27e-05
GO:0016202	regulation of striated muscle tissue development	141	36	3.35e-05
GO:1902533	positive regulation of intracellular signal transduction	969	141	3.38e-05
GO:0051174	regulation of phosphorus metabolic process	1717	228	3.51e-05
GO:0016043	cellular component organization	5909	651	3.52e-05
GO:0051252	regulation of RNA metabolic process	3747	445	3.71e-05
GO:0042327	positive regulation of phosphorylation	973	144	3.75e-05
GO:0021543	pallium development	163	41	3.88e-05
GO:0021879	forebrain neuron differentiation	54	21	3.98e-05
GO:0006351	transcription, DNA-templated	3692	440	4.09e-05
GO:2000146	negative regulation of cell motility	268	52	4.27e-05
GO:0014033	neural crest cell differentiation	69	22	4.56e-05
GO:0021536	diencephalon development	77	25	4.97e-05
GO:0042476	odontogenesis	120	32	5.38e-05
GO:0008285	negative regulation of cell proliferation	696	109	5.79e-05
GO:0048634	regulation of muscle organ development	146	36	5.84e-05
GO:0030278	regulation of ossification	184	41	6.39e-05
GO:0019219	regulation of nucleobase-containing compound metabolic process	4129	480	6.4e-05
GO:0003012	muscle system process	446	77	6.52e-05
GO:0050954	sensory perception of mechanical stimulus	156	39	6.61e-05
GO:0097659	nucleic acid-templated transcription	3709	440	6.95e-05
GO:0010817	regulation of hormone levels	481	81	6.96e-05
GO:0032330	regulation of chondrocyte differentiation	45	19	7.32e-05
GO:1902531	regulation of intracellular signal transduction	1780	231	7.44e-05
GO:0061138	morphogenesis of a branching epithelium	180	42	7.86e-05
GO:0006022	aminoglycan metabolic process	165	40	7.9e-05
GO:0042325	regulation of phosphorylation	1469	200	8.07e-05
GO:0032774	RNA biosynthetic process	3725	441	8.66e-05
GO:0030097	hemopoiesis	814	121	8.8e-05
GO:0001704	formation of primary germ layer	125	33	9.72e-05
GO:0031324	negative regulation of cellular metabolic process	2642	314	0.000108
GO:0072006	nephron development	138	35	0.00011
GO:0051172	negative regulation of nitrogen compound metabolic process	2488	299	0.000111
GO:0014031	mesenchymal cell development	65	21	0.000122
GO:0030203	glycosaminoglycan metabolic process	158	38	0.000122
GO:0007626	locomotory behavior	191	41	0.000134
GO:0040013	negative regulation of locomotion	297	56	0.000146
GO:0060021	palate development	91	27	0.000147
GO:0021522	spinal cord motor neuron differentiation	32	16	0.000148
GO:0040008	regulation of growth	642	101	0.000148
GO:0001755	neural crest cell migration	38	15	0.000151
GO:0021772	olfactory bulb development	30	16	0.000167
GO:2000027	regulation of organ morphogenesis	250	50	0.000174
GO:0001709	cell fate determination	40	16	0.000194
GO:0060255	regulation of macromolecule metabolic process	5987	662	0.000203
GO:0030036	actin cytoskeleton organization	588	94	0.000217
GO:0002062	chondrocyte differentiation	93	27	0.000225
GO:0008219	cell death	2116	260	0.000235
GO:0090101	negative regulation of transmembrane receptor protein serine/threonine kinase signaling pathway	109	30	0.000238
GO:0045785	positive regulation of cell adhesion	386	69	0.000255
GO:0030336	negative regulation of cell migration	253	48	0.000262
GO:0030855	epithelial cell differentiation	724	110	0.000273
GO:0006812	cation transport	1099	157	0.000278
GO:0060538	skeletal muscle organ development	163	39	0.000285
GO:0007519	skeletal muscle tissue development	156	38	0.000289
GO:0007264	small GTPase mediated signal transduction	492	80	0.000297
GO:0048754	branching morphogenesis of an epithelial tube	148	36	0.000297
GO:0021988	olfactory lobe development	31	16	0.00031
GO:0006023	aminoglycan biosynthetic process	109	30	0.000315
GO:0042692	muscle cell differentiation	401	68	0.000345
GO:0006029	proteoglycan metabolic process	83	25	0.000348
GO:0012501	programmed cell death	1987	245	0.000371
GO:0007605	sensory perception of sound	140	35	0.000372
GO:0042471	ear morphogenesis	113	30	0.000415
GO:0048701	embryonic cranial skeleton morphogenesis	45	17	0.000463
GO:0019438	aromatic compound biosynthetic process	4252	486	0.000495
GO:0002088	lens development in camera-type eye	68	20	0.000497
GO:0021885	forebrain cell migration	57	21	0.000504
GO:0048864	stem cell development	65	20	0.000517
GO:0001656	metanephros development	87	26	0.000522
GO:0034654	nucleobase-containing compound biosynthetic process	4184	479	0.000525
GO:0007492	endoderm development	78	24	0.000549
GO:0002521	leukocyte differentiation	466	77	0.000569
GO:0010001	glial cell differentiation	187	43	0.000574
GO:0018212	peptidyl-tyrosine modification	370	68	0.000579
GO:1903707	negative regulation of hemopoiesis	135	34	0.000612
GO:0022029	telencephalon cell migration	54	20	0.000619
GO:0060687	regulation of branching involved in prostate gland morphogenesis	7	6	0.000639
GO:0050770	regulation of axonogenesis	153	38	0.000649
GO:0001667	ameboidal-type cell migration	349	62	0.000695
GO:1901362	organic cyclic compound biosynthetic process	4394	498	0.000698
GO:0072009	nephron epithelium development	109	29	0.00075
GO:0018130	heterocycle biosynthetic process	4244	484	0.000756
GO:0051050	positive regulation of transport	955	133	0.000839
GO:0002065	columnar/cuboidal epithelial cell differentiation	105	28	0.000867
GO:0010810	regulation of cell-substrate adhesion	189	41	0.000869
GO:0014032	neural crest cell development	61	19	0.000882
GO:0018108	peptidyl-tyrosine phosphorylation	367	67	0.000895
GO:0006024	glycosaminoglycan biosynthetic process	108	29	0.000928
GO:0030111	regulation of Wnt signaling pathway	324	60	0.000982
GO:0042391	regulation of membrane potential	403	69	0.000988
GO:1904888	cranial skeletal system development	65	20	0.000993
GO:0023061	signal release	419	71	0.00104
GO:0045995	regulation of embryonic development	122	31	0.00116
GO:0009890	negative regulation of biosynthetic process	1698	210	0.0013
GO:0031327	negative regulation of cellular biosynthetic process	1679	208	0.00131
GO:0045778	positive regulation of ossification	85	22	0.00132
GO:0048048	embryonic eye morphogenesis	34	15	0.00145
GO:0010976	positive regulation of neuron projection development	237	49	0.00146
GO:0051056	regulation of small GTPase mediated signal transduction	299	54	0.00149
GO:0030282	bone mineralization	99	25	0.00151
GO:0043523	regulation of neuron apoptotic process	194	42	0.00156
GO:0031345	negative regulation of cell projection organization	150	35	0.00158
GO:0007156	homophilic cell adhesion via plasma membrane adhesion molecules	155	38	0.0016
GO:0009914	hormone transport	310	55	0.00174
GO:0048608	reproductive structure development	422	70	0.00184
GO:0072210	metanephric nephron development	42	16	0.00197
GO:0001558	regulation of cell growth	385	66	0.00217
GO:0071840	cellular component organization or biogenesis	6116	654	0.00219
GO:0061458	reproductive system development	425	70	0.00225
GO:0061005	cell differentiation involved in kidney development	54	17	0.00228
GO:0046903	secretion	1537	191	0.0025
GO:0060560	developmental growth involved in morphogenesis	205	44	0.00251
GO:0042475	odontogenesis of dentin-containing tooth	84	24	0.00255
GO:0060442	branching involved in prostate gland morphogenesis	12	7	0.00276
GO:0046578	regulation of Ras protein signal transduction	201	41	0.00293
GO:0030902	hindbrain development	142	35	0.00297
GO:0033688	regulation of osteoblast proliferation	23	11	0.00299
GO:0090288	negative regulation of cellular response to growth factor stimulus	138	33	0.00312
GO:0016331	morphogenesis of embryonic epithelium	148	34	0.00319
GO:0051146	striated muscle cell differentiation	269	50	0.00326
GO:0003006	developmental process involved in reproduction	641	96	0.00333
GO:0000003	reproduction	1354	174	0.00335
GO:0031399	regulation of protein modification process	1723	215	0.00344
GO:0048638	regulation of developmental growth	306	56	0.00354
GO:1901700	response to oxygen-containing compound	1518	189	0.00367
GO:0051129	negative regulation of cellular component organization	613	91	0.00369
GO:0050803	regulation of synapse structure or activity	132	32	0.00369
GO:0001101	response to acid chemical	322	57	0.00391
GO:0031326	regulation of cellular biosynthetic process	4395	492	0.00406
GO:0031214	biomineral tissue development	130	29	0.00435
GO:0031401	positive regulation of protein modification process	1185	156	0.00441
GO:0030098	lymphocyte differentiation	315	56	0.00459
GO:1901863	positive regulation of muscle tissue development	82	23	0.00459
GO:0003007	heart morphogenesis	235	45	0.00463
GO:0060541	respiratory system development	197	41	0.00482
GO:0022414	reproductive process	1353	173	0.00485
GO:0021795	cerebral cortex cell migration	42	17	0.00488
GO:0050807	regulation of synapse organization	127	31	0.0051
GO:0001649	osteoblast differentiation	207	41	0.00515
GO:0051402	neuron apoptotic process	219	43	0.00528
GO:0016049	cell growth	480	77	0.00536
GO:0010977	negative regulation of neuron projection development	127	31	0.00538
GO:0043524	negative regulation of neuron apoptotic process	136	31	0.00542
GO:0060688	regulation of morphogenesis of a branching structure	53	17	0.00544
GO:0045936	negative regulation of phosphate metabolic process	585	90	0.00559
GO:0003151	outflow tract morphogenesis	74	21	0.00571
GO:0010563	negative regulation of phosphorus metabolic process	586	90	0.00594
GO:0048483	autonomic nervous system development	43	15	0.00598
GO:0050878	regulation of body fluid levels	491	76	0.00604
GO:0009798	axis specification	89	23	0.00613
GO:0030856	regulation of epithelial cell differentiation	143	30	0.00628
GO:0072080	nephron tubule development	92	25	0.00632
GO:0007416	synapse assembly	149	35	0.00677
GO:0030500	regulation of bone mineralization	67	18	0.00697
GO:0010453	regulation of cell fate commitment	37	14	0.00746
GO:1902106	negative regulation of leukocyte differentiation	89	24	0.00749
GO:0009889	regulation of biosynthetic process	4462	498	0.00766
GO:0060993	kidney morphogenesis	92	25	0.00789
GO:0032940	secretion by cell	1406	176	0.00825
GO:0034762	regulation of transmembrane transport	454	72	0.00828
GO:0060037	pharyngeal system development	25	10	0.00872
GO:0016358	dendrite development	205	41	0.00879
GO:0003279	cardiac septum development	98	25	0.00895
GO:0072028	nephron morphogenesis	77	22	0.00926
GO:0061326	renal tubule development	94	25	0.0097
GO:0072132	mesenchyme morphogenesis	46	15	0.00987

## Sheet: Tables S3-4_Pr. interactions
Table S3- EpiMods of DNA methylation protein-protein interactions in prostate cancer
EntrezID(Seed)	Symbol(Seed)	Size	Modularity index	P-value	Genes
7296	TXNRD1	13	4.74139	0.009	TXNRD1 TXNIP PPP1R16A GLRX2 RGMA IDO1 LY6H FSD1 DDX27 CDH24 SCEL HLA-E PHPT1
6678	SPARC	28	3.99896	0.002	SPARC PDGFA HSPG2 COL13A1 COL3A1 CTSK PCOLCE NID2 DDR2 VWA1 COL11A2 DDR1 COL11A1 COL2A1 HTRA1 COMP LOXL4 COL9A3 ITGA10 COL5A2 COL5A1 LRP10 COCH COL9A2 PRELP MATN1 MATN3 GRN
2104	ESRRG	10	3.55251	0.01	ESRRG PPARGC1B ARHGEF15 PROX1 ESRRA NR0B2 DUT PNRC1 NR5A2 HNF4G
25928	SOSTDC1	33	3.15246	0.02	SOSTDC1 BMP4 BMP2 BMPR2 BMP6 BAMBI BMP7 CER1 BMPER NOG CHRD FST FSTL1 BMPR1A GREM2 GREM1 INHBE BMP8B CCDC89 MGP OC90 GDF6 SOX30 TWSG1 GDF5 TLL1 HTRA1 LRP10 GDF2 MOS LSP1 LMX1A CES1
1281	COL3A1	10	5.36217	0	COL3A1 DDR1 HTRA1 PCOLCE DDR2 COL11A2 COL11A1 COL5A2 COL5A1 LRP10
7205	TRIP6	20	4.16744	0.005	TRIP6 AQP1 HOXA1 HOXA9 KIAA1683 PTK2 PRKAA2 SYNGAP1 LPAR2 PTPN13 CATSPER1 NUP210 ODF1 EFEMP2 ULK1 ODF2 SPAG4 CHIC2 PLEKHA1 ARHGAP29
4617	MYF5	11	3.17366	0.01	MYF5 ID3 ID2 ID1 MYOG MDFIC MYF6 ELK4 MSC IFI16 TMEM173
6374	CXCL5	10	3.95919	0.01	CXCL5 CXCR1 CXCR2 CXCL6 CXCL3 CXCL2 ADRA1A GRIA1 MYO5B ADRA1D
3676	ITGA4	23	3.99645	0.002	ITGA4 CD82 CD81 EED PRKACB MDK THBS2 EMILIN1 LGALS8 CD53 JAM2 ADAM28 ADAM2 JAML MADCAM1 EMILIN2 PTGFRN MS4A1 CLGN IFITM1 CR2 EZH1 AEBP2
Table 4- Network details of the Epi-Mods
EntrezID	Gene	Methylation difference P-value
TXNRD1 (13 genes)
7296	TXNRD1	1e-18
10628	TXNIP	0.298
84988	PPP1R16A	1e-05
51022	GLRX2	0.071
56963	RGMA	4e-08
3620	IDO1	3e-07
4062	LY6H	0.0002
79187	FSD1	0.021
55661	DDX27	0.461
64403	CDH24	0.208
8796	SCEL	0.105
3133	HLA-E	0.812
29085	PHPT1	0.885
SPARC (28 genes)
6678	SPARC	2e-15
5154	PDGFA	0.487
3339	HSPG2	0.135
1305	COL13A1	0.003
1281	COL3A1	3e-13
1513	CTSK	3e-07
5118	PCOLCE	1e-07
22795	NID2	2e-07
4921	DDR2	1e-09
64856	VWA1	0.018
1302	COL11A2	1e-05
780	DDR1	0.063
1301	COL11A1	0.011
1280	COL2A1	0.062
5654	HTRA1	0.112
1311	COMP	2e-05
84171	LOXL4	0.001
1299	COL9A3	0.063
8515	ITGA10	0.0006
1290	COL5A2	2e-11
1289	COL5A1	0.019
26020	LRP10	0.15
1690	COCH	0.015
1298	COL9A2	0.386
5549	PRELP	0.863
4146	MATN1	0.232
4148	MATN3	0.096
2896	GRN	0.742
ESRRG (10 genes)
2104	ESRRG	3e-14
133522	PPARGC1B	0.34
22899	ARHGEF15	4e-09
5629	PROX1	0.6
2101	ESRRA	0.692
8431	NR0B2	0.013
1854	DUT	0.764
10957	PNRC1	0.364
2494	NR5A2	0.097
3174	HNF4G	0.85
SOSTDC1 (33 genes)
25928	SOSTDC1	9e-14
652	BMP4	1e-08
650	BMP2	0.472
659	BMPR2	0.622
654	BMP6	0.032
25805	BAMBI	2e-06
655	BMP7	0.001
9350	CER1	3e-05
168667	BMPER	0.125
9241	NOG	0.96
8646	CHRD	0.005
10468	FST	0.02
11167	FSTL1	2e-09
657	BMPR1A	0.0002
64388	GREM2	0.161
26585	GREM1	0.435
83729	INHBE	1e-07
656	BMP8B	0.129
220388	CCDC89	1e-08
4256	MGP	7e-07
729330	OC90	4e-06
392255	GDF6	0.322
11063	SOX30	0.52
57045	TWSG1	0.21
8200	GDF5	0.072
7092	TLL1	0.942
5654	HTRA1	0.112
26020	LRP10	0.15
2658	GDF2	0.0002
4342	MOS	1e-06
4046	LSP1	0.017
4009	LMX1A	0.0008
1066	CES1	0.633
COL3A1 (10 genes)
1281	COL3A1	3e-13
780	DDR1	0.063
5654	HTRA1	0.112
5118	PCOLCE	1e-07
4921	DDR2	1e-09
1302	COL11A2	1e-05
1301	COL11A1	0.011
1290	COL5A2	2e-11
1289	COL5A1	0.019
26020	LRP10	0.15
TRIP6 (20 genes)
7205	TRIP6	1e-12
358	AQP1	1e-07
3198	HOXA1	0.241
3205	HOXA9	0.579
80726	KIAA1683	1e-09
5747	PTK2	0.374
5563	PRKAA2	0.372
8831	SYNGAP1	0.001
9170	LPAR2	0.03
5783	PTPN13	0.542
117144	CATSPER1	0.173
23225	NUP210	0.055
4956	ODF1	0.713
30008	EFEMP2	4e-06
8408	ULK1	0.139
4957	ODF2	0.082
6676	SPAG4	0.539
26511	CHIC2	0.666
59338	PLEKHA1	0.3
9411	ARHGAP29	0.64
MYF5 (11 genes)
4617	MYF5	2e-12
3399	ID3	0.002
3398	ID2	0.763
3397	ID1	0.904
4656	MYOG	0.093
29969	MDFIC	1e-09
4618	MYF6	3e-05
2005	ELK4	0.004
9242	MSC	2e-06
3428	IFI16	0.991
340061	TMEM173	5e-11
CXCL5 (10 genes)
6374	CXCL5	1e-11
3577	CXCR1	0.024
3579	CXCR2	0.0006
6372	CXCL6	1e-13
2921	CXCL3	0.002
2920	CXCL2	0.069
148	ADRA1A	3e-05
2890	GRIA1	0.018
4645	MYO5B	0.622
146	ADRA1D	0.209
ITGA4 (23 genes)
3676	ITGA4	1e-10
3732	CD82	0.043
975	CD81	0.183
8726	EED	0.589
5567	PRKACB	0.492
4192	MDK	0.169
7058	THBS2	0.25
11117	EMILIN1	7e-10
3964	LGALS8	0.016
963	CD53	9e-06
58494	JAM2	0.015
10863	ADAM28	1e-05
2515	ADAM2	0.015
120425	JAML	4e-05
8174	MADCAM1	4e-06
84034	EMILIN2	0.009
5738	PTGFRN	0.055
931	MS4A1	0.21
1047	CLGN	0.492
8519	IFITM1	8e-09
1380	CR2	0.281
2145	EZH1	0.055
121536	AEBP2	0.046

## Sheet: Table S5_DMRs
Table S6- DMRs in prostate cancer
Chromosome	start	end	Region length (bp)	Regional ethylation Difference (Tumor - Normal)	Probes	FWER	Distance to gene (bp)	Distance to CpG island	Gene
chr1	1181956	1182424	469	0.267051	4	0	0	0	C1QTNF12
chr1	1935125	1935445	321	0.236588	3	0.002	0	0	CFAP74
chr1	2461413	2461929	517	0.302257	7	0	0	0	HES5
chr1	3514921	3515194	274	0.256847	3	0	0	2802	MEGF6
chr1	6663664	6664268	605	0.243718	4	0.001	9487	0
chr1	8277394	8277746	353	0.245586	3	0.001	106643	0
chr1	9129487	9129648	162	0.248625	3	0.001	0	1954	SLC2A5
chr1	9884600	9884732	133	0.246148	5	0	49	0
chr1	24648696	24649398	703	0.253564	4	0	0	0	GRHL3
chr1	32169568	32169706	139	0.228378	3	0.004	0	0	COL16A1
chr1	33938191	33938307	117	0.278992	5	0	0	0	ZSCAN20
chr1	38200920	38201123	204	0.325579	3	0	0	0	EPHA10
chr1	40137966	40138052	87	0.240458	3	0.001	6592	0
chr1	45285821	45286062	242	0.24324	3	0.001	0	6176	PTCH2
chr1	45792660	45792733	74	0.254347	4	0	0	0	HPDL
chr1	46913787	46914528	742	0.317194	4	0	2412	0
chr1	46951318	46951477	160	0.287035	3	0	39943	0
chr1	47998999	47999163	165	0.323874	3	0	227036	0
chr1	48937250	48937653	404	0.290053	4	0	0	0	SPATA6
chr1	50886393	50886782	390	0.224068	3	0.004	0	0	DMRTA2
chr1	53068181	53068587	407	0.226318	4	0.004	0	0	GPX7
chr1	53308908	53309261	354	0.245674	3	0.001	0	0	ZYG11A
chr1	59612408	59612710	303	0.252593	3	0	0	0	HSD52
chr1	63795435	63796263	829	0.25141	7	0	4637	0
chr1	64937345	64937528	184	0.279624	3	0	0	730	CACHD1
chr1	65468782	65468827	46	0.240002	3	0.001	144404	0
chr1	66258022	66258046	25	0.239628	3	0.001	154845	394
chr1	66998806	66999813	1008	0.285005	9	0	158543	0
chr1	70035080	70035846	767	0.260981	5	0	0	584	LRRC7
chr1	76082568	76082888	321	0.269248	3	0	0	202	SLC44A5
chr1	76540465	76540641	177	0.259325	3	0	0	0	ST6GALNAC3
chr1	78511600	78511856	257	0.243818	3	0.001	0	0	GIPC2
chr1	79472282	79472452	171	0.274159	5	0	0	0	ADGRL4
chr1	85464000	85464261	262	0.264519	4	0	63731	0
chr1	91301651	91301962	312	0.280636	3	0	78894	0
chr1	95393096	95393138	43	0.246993	3	0.001	360	0
chr1	110210265	110210641	377	0.246616	3	0.001	0	0	GSTM2
chr1	110672769	110673319	551	0.261141	6	0	59446	0
chr1	112058304	112058559	256	0.265731	3	0	0	0	ADORA3
chr1	116371083	116371337	255	0.221184	3	0.005	130237	0
chr1	116711075	116711339	265	0.261585	3	0	203664	0
chr1	119527008	119527156	149	0.216846	3	0.006	0	0	TBX15
chr1	119548825	119549145	321	0.249861	3	0.001	362256	0
chr1	119870287	119870478	192	0.284014	3	0	186991	0
chr1	146544044	146544645	602	0.254851	3	0	0	0
chr1	146544044	146544645	602	0.254851	3	0	0	0
chr1	146544044	146544645	602	0.254851	3	0	0	0
chr1	146551201	146552390	1190	0.274153	5	0	0	0
chr1	146551201	146552390	1190	0.274153	5	0	0	0
chr1	146551201	146552390	1190	0.274153	5	0	0	0
chr1	146556239	146556675	437	0.244041	3	0.001	0	0
chr1	146556239	146556675	437	0.244041	3	0.001	0	0
chr1	146556239	146556675	437	0.244041	3	0.001	0	0
chr1	151103642	151104003	362	0.247586	3	0.001	12634	0
chr1	155290535	155290813	279	0.223127	5	0.003	0	0	RUSC1
chr1	155290535	155290813	279	0.223127	5	0.003	0	0	RUSC1-AS1
chr1	156358231	156358408	178	0.276911	3	0	3217	0
chr1	169396637	169396909	273	0.342362	8	0	0	0	CCDC181
chr1	197882170	197882469	300	0.236218	3	0.002	0	532	LHX9
chr1	200003342	200005453	2112	0.25247	12	0	0	0	NR5A2
chr1	204329081	204329158	78	0.240447	3	0.001	23	17574
chr1	208132388	208132787	400	0.276479	4	0	62800	0
chr1	213090116	213090240	125	0.230254	3	0.003	58635	33407
chr1	217311014	217311547	534	0.238176	6	0.001	0	0	ESRRG
chr1	246952215	246952508	294	0.300443	4	0	0	0	LINC01341
chr10	3108651	3109053	403	0.290239	3	0	751382	0
chr10	8097183	8097354	172	0.258654	3	0	0	0	GATA3
chr10	11206772	11206870	99	0.25105	6	0	0	308	CELF2
chr10	18549536	18549778	243	0.248887	3	0.001	0	119301	CACNB2
chr10	26223100	26223310	211	0.210461	3	0.007	0	0	MYO3A
chr10	28035631	28036151	521	0.228872	8	0	852	419
chr10	30724020	30724274	255	0.25195	4	0	0	312	MAP3K8
chr10	43697849	43698141	293	0.379133	4	0	0	0	RASGEF1A
chr10	45914276	45914949	674	0.324387	7	0	0	0	ALOX5
chr10	52177823	52178225	403	0.255628	4	0	0	0	SGMS1
chr10	70321383	70321580	198	0.314239	4	0	0	560	TET1
chr10	73846858	73847259	402	0.228932	3	0.003	0	0	ANAPC16
chr10	73846858	73847259	402	0.228932	3	0.003	0	0	SPOCK2
chr10	73848153	73848458	306	0.215161	3	0.006	0	0	ANAPC16
chr10	73848153	73848458	306	0.215161	3	0.006	0	0	SPOCK2
chr10	81003020	81003657	638	0.206591	3	0.008	0	0	ZMIZ1
chr10	88730946	88731295	350	0.229926	3	0.003	0	0	AGAP11
chr10	93646991	93647648	658	0.252745	6	0	21758	0
chr10	94825547	94825667	121	0.255868	3	0	0	0	CYP26C1
chr10	94826053	94826319	267	0.240641	3	0.001	0	0	CYP26C1
chr10	95517498	95517562	65	0.246163	3	0.001	54584	54997
chr10	99473085	99473224	140	0.262025	3	0	26069	0
chr10	100993553	100993587	35	0.226512	4	0.004	0	233	HPSE2
chr10	101279697	101280523	827	0.312247	5	0	12166	0
chr10	102419564	102419617	54	0.234848	3	0.002	129927	0
chr10	102589840	102590225	386	0.221375	3	0.005	147353	0
chr10	102893925	102894148	224	0.288139	4	0	0	0	TLX1
chr10	102899949	102900130	182	0.264516	3	0	2402	0
chr10	102905681	102906057	377	0.332126	3	0	8134	0
chr10	102996254	102996464	211	0.222691	3	0.004	0	0	LBX1-AS1
chr10	103043991	103044194	204	0.253118	3	0	45374	0
chr10	103880979	103881480	502	0.243136	5	0	11306	350
chr10	119000215	119000638	424	0.222661	3	0.004	0	0	SLC18A2
chr10	123356236	123356336	101	0.21302	3	0.007	0	280	FGFR2
chr10	123922863	123923450	588	0.311017	8	0	0	0	TACC2
chr11	2904951	2905372	422	0.274327	3	0	0	0	CDKN1C
chr11	3181446	3181928	483	0.321004	5	0	0	0	OSBPL5
chr11	19736150	19736333	184	0.238052	5	0.001	0	829	LOC100126784
chr11	19736150	19736333	184	0.238052	5	0.001	0	829	NAV2
chr11	20618198	20618250	53	0.307158	3	0	436327	0
chr11	27015656	27015991	336	0.264791	5	0	0	368368	FIBIN
chr11	35160330	35160462	133	0.252484	3	0	0	0	CD44
chr11	35639492	35639632	141	0.251925	3	0	102	0
chr11	46317036	46317577	542	0.250647	4	0.001	0	0	CREB3L1
chr11	46383066	46383209	144	0.225132	3	0.004	0	4696	DGKZ
chr11	47278977	47279586	610	0.243811	5	0	0	8343	NR1H3
chr11	57194120	57194562	443	0.279265	4	0	0	0	SLC43A3
chr11	58940866	58941415	550	0.302995	4	0	0	0	DTX4
chr11	61283968	61284417	450	0.258039	3	0	0	0	SYT7
chr11	62691066	62691452	387	0.255759	4	0	2053	0
chr11	63258712	63258744	33	0.236928	4	0.002	31	0
chr11	63828672	63828762	91	0.254732	3	0	0	24041	MACROD1
chr11	66326767	66327000	234	0.22025	3	0.005	0	0	ACTN3
chr11	67350976	67351786	811	0.289053	6	0	0	0	GSTP1
chr11	70508180	70508410	231	0.229807	3	0.003	0	0	SHANK2
chr11	76033097	76033391	295	0.276889	3	0	122677	0
chr11	89867653	89867819	167	0.235971	5	0.001	0	80696	NAALAD2
chr11	105480979	105481292	314	0.221222	3	0.005	0	0	GRIA4
chr11	111169457	111169865	409	0.244329	4	0.001	0	0	COLCA2
chr11	111169457	111169865	409	0.244329	4	0.001	0	0	COLCA1
chr11	111383515	111383603	89	0.229301	3	0.003	59	0
chr11	111410960	111411076	117	0.232754	3	0.002	156	0
chr11	111411216	111411381	166	0.282364	3	0	0	0	LAYN
chr11	111847475	111847747	273	0.230399	3	0.003	0	180	DIXDC1
chr11	116371188	116371781	594	0.260779	5	0	247104	0
chr11	117069780	117069859	80	0.234948	3	0.002	0	19545	LOC100652768
chr12	2944163	2944493	331	0.264653	6	0	0	22035	NRIP2
chr12	8088818	8088937	120	0.224853	3	0.004	0	34409	SLC2A3
chr12	14720805	14720858	54	0.228663	3	0.004	69107	0
chr12	22487219	22487459	241	0.274279	3	0	0	0	ST8SIA1
chr12	47219705	47219797	93	0.249632	4	0.001	0	5115	SLC38A4
chr12	48591673	48592270	598	0.324714	3	0	11963	0
chr12	50297477	50297793	317	0.290551	5	0	0	0	FAIM2
chr12	52258077	52258264	188	0.234674	3	0.002	23528	0
chr12	52400907	52401523	617	0.313986	4	0	0	0	GRASP
chr12	52626814	52627047	234	0.230256	6	0.001	0	0	KRT7
chr12	53183930	53184086	157	0.307032	4	0	0	0	KRT3
chr12	53359155	53359506	352	0.244227	3	0.001	12469	0
chr12	53612551	53613154	604	0.269192	4	0	0	562	RARG
chr12	54071090	54071194	105	0.260807	5	0	33707	0
chr12	54409485	54409657	173	0.255798	5	0	2939	771
chr12	54424085	54424964	880	0.231532	5	0.001	0	0	HOXC4
chr12	54424085	54424964	880	0.231532	5	0.001	0	0	HOXC5
chr12	54424085	54424964	880	0.231532	5	0.001	0	0	HOXC6
chr12	54447136	54447283	148	0.266859	4	0	0	461	HOXC4
chr12	54447349	54448090	742	0.263688	7	0	0	0	HOXC4
chr12	54653364	54653427	64	0.29033	3	0	0	19895	CBX5
chr12	63025490	63026424	935	0.263371	7	0	11338	0
chr12	65219392	65220152	761	0.268033	4	0	0	248	TBC1D30
chr12	81471419	81472118	700	0.245752	11	0	0	0	ACSS3
chr12	89744471	89744609	139	0.221542	4	0.005	0	559	DUSP6
chr12	89744662	89744877	216	0.287752	3	0	0	291	DUSP6
chr12	95941869	95941988	120	0.320699	3	0	0	0	USP44
chr12	100750652	100750702	51	0.254138	3	0	16737	89005
chr12	103311088	103311596	509	0.261675	7	0	0	0	PAH
chr12	104609432	104609797	366	0.32351	6	0	0	0	TXNRD1
chr12	104852151	104852446	296	0.346971	4	0	0	0	CHST11
chr12	106533667	106533898	232	0.257263	5	0	0	0	NUAK1
chr12	108168987	108169333	347	0.233986	3	0.002	0	0	ASCL4
chr12	111127139	111127533	395	0.244259	3	0.001	0	0	HVCN1
chr12	115136072	115136308	237	0.312004	12	0	285434	0
chr12	116036878	116037223	346	0.249778	3	0.001	934003	146882
chr12	120242394	120242513	120	0.219748	3	0.005	0	160	CIT
chr12	124246434	124247223	790	0.245166	7	0	0	0	DNAH10
chr12	125140105	125140249	145	0.257353	3	0	121924	5196
chr13	20735532	20735860	329	0.250249	3	0.001	348	0
chr13	28541142	28541477	336	0.252084	3	0	0	0	CDX2
chr13	36045201	36045281	81	0.22112	3	0.005	0	0	NBEA
chr13	36919409	36919960	552	0.280896	6	0	0	0	SPART
chr13	43566114	43566618	505	0.273078	10	0	0	0	EPSTI1
chr13	74707145	74707400	256	0.288166	3	0	0	601	KLF12
chr13	95620874	95620997	124	0.286847	3	0	256484	0
chr13	96204870	96205295	426	0.267132	6	0	0	0	CLDN10
chr13	97646341	97646736	396	0.264159	4	0	0	0	OXGR1
chr13	97646803	97647084	282	0.234311	3	0.002	147005	65
chr13	100547249	100547331	83	0.250609	3	0.001	0	0	CLYBL
chr13	100641409	100641867	459	0.250758	4	0.001	2389	0
chr14	21539712	21540329	618	0.239032	3	0.002	0	0	ARHGEF40
chr14	22004993	22005368	376	0.279953	4	0	0	25293	SALL2
chr14	23834808	23836012	1205	0.256645	11	0	0	0	EFS
chr14	24641070	24641201	132	0.254026	7	0	8223	0
chr14	24803679	24804342	664	0.296833	10	0	0	0	ADCY4
chr14	24837836	24838126	291	0.242471	4	0.001	0	0	NFATC4
chr14	29235092	29235196	105	0.240451	4	0.001	1081	0
chr14	29254853	29254961	109	0.229891	3	0.003	0	0	LINC01551
chr14	36983518	36983737	220	0.225966	4	0.004	0	0	SFTA3
chr14	38679643	38680313	671	0.243385	4	0.001	0	0	SSTR1
chr14	38724648	38724945	298	0.269831	3	0	0	0	CLEC14A
chr14	52536147	52536436	290	0.226812	3	0.004	200	0
chr14	57261886	57262177	292	0.259689	3	0	16546	0
chr14	57278710	57279115	406	0.263772	3	0	0	0	OTX2-AS1
chr14	60973823	60974039	217	0.241221	3	0.001	21058	0
chr14	70653719	70654290	572	0.287126	5	0	0	805	SLC8A3
chr14	91580429	91580613	185	0.230499	5	0.001	0	52876	DGLUCY
chr14	95234826	95235489	664	0.241705	7	0	0	0	GSC
chr14	95239570	95240143	574	0.251916	4	0	3070	0
chr15	33009409	33009531	123	0.235907	3	0.002	20110	0
chr15	37389951	37390284	334	0.277754	3	0	0	0	MEIS2
chr15	41805273	41805946	674	0.278719	4	0	0	0	LTK
chr15	45421998	45422325	328	0.245931	7	0	0	0	DUOX1
chr15	45421998	45422325	328	0.245931	7	0	0	0	DUOXA1
chr15	45670865	45670875	11	0.279565	3	0	0	0	GATM
chr15	48938347	48938576	230	0.233693	3	0.002	361	0
chr15	51385916	51386254	339	0.251801	3	0	0	0	TNFAIP8L3
chr15	60690667	60690974	308	0.3006	4	0	20833	0
chr15	68121028	68121563	536	0.241436	3	0.001	0	0	SKOR1
chr15	74218697	74218733	37	0.213367	3	0.007	0	0	LOXL1-AS1
chr15	74658244	74658573	330	0.310356	5	0	0	0	CYP11A1
chr15	83316911	83317306	396	0.20354	3	0.008	0	0	CPEB1-AS1
chr15	83953744	83953775	32	0.225681	3	0.004	147632	0
chr15	89438208	89438964	757	0.281557	8	0	0	0	HAPLN3
chr15	89952052	89952904	853	0.259385	7	0	61733	0
chr15	90039582	90039913	332	0.309743	9	0	0	0	RHCG
chr16	1030561	1030586	26	0.230005	3	0.003	0	0	LMF1
chr16	3062382	3062795	414	0.237201	5	0.001	0	884	CLDN9
chr16	3079708	3079953	246	0.223007	4	0.004	0	0	BICDL2
chr16	3237964	3238423	460	0.26172	3	0	15823	382
chr16	19894948	19895321	374	0.307662	3	0	0	0	GPRC5B
chr16	23847325	23847568	244	0.258266	3	0	0	0	PRKCB
chr16	25704296	25704507	212	0.316511	3	0	0	0	HS3ST4
chr16	29888571	29888733	163	0.213403	3	0.007	0	254	SLX1B-SULT1A4
chr16	29888571	29888733	163	0.213403	3	0.007	0	254	SEZ6L2
chr16	29888571	29888733	163	0.213403	3	0.007	0	254	SMG1P2
chr16	29888571	29888733	163	0.213403	3	0.007	0	254	SLX1A
chr16	29888571	29888733	163	0.213403	3	0.007	0	254	BOLA2
chr16	29888571	29888733	163	0.213403	3	0.007	0	254	LOC606724
chr16	29888571	29888733	163	0.213403	3	0.007	0	254	LOC613038
chr16	31214417	31214607	191	0.26622	4	0	0	129	PYCARD-AS1
chr16	51185110	51185147	38	0.215662	3	0.006	0	0	SALL1
chr16	54968727	54969146	420	0.235577	5	0.001	5625	921
chr16	54970302	54971007	706	0.214954	3	0.007	7200	0
chr16	56672387	56672525	139	0.247067	3	0.001	0	0	MT1A
chr16	66612955	66613096	142	0.252528	3	0	0	0	CKLF-CMTM1
chr16	66612955	66613096	142	0.252528	3	0	0	0	CMTM1
chr16	67203753	67204807	1055	0.278755	7	0	0	0	HSF4
chr16	67203753	67204807	1055	0.278755	7	0	0	0	NOL3
chr16	79623618	79623751	134	0.252925	4	0	377053	0
chr16	88717134	88717755	622	0.292065	12	0	0	0	CYBA
chr17	873255	873452	198	0.218765	3	0.005	0	8281	NXN
chr17	5019638	5019761	124	0.22103	3	0.005	0	0	ZNF232
chr17	5019638	5019761	124	0.22103	3	0.005	0	0	USP6
chr17	6899207	6899310	104	0.232242	3	0.002	0	0	ALOX12-AS1
chr17	12877227	12877772	546	0.247736	4	0.001	0	0	ARHGAP44
chr17	19290503	19290690	188	0.223226	3	0.004	0	7961	MFAP4
chr17	27917879	27918338	460	0.282897	5	0	0	0	ANKRD13B
chr17	29249485	29250073	589	0.218353	3	0.005	0	0	ADAP2
chr17	33701321	33701353	33	0.241312	3	0.001	36727	0
chr17	35014412	35014588	177	0.221617	3	0.005	49004	0
chr17	38465281	38465510	230	0.260312	7	0	0	7448	RARA
chr17	41363597	41364007	411	0.337983	9	0	0	0	TMEM106A
chr17	41363597	41364007	411	0.337983	9	0	0	0	NBR1
chr17	42386190	42386419	230	0.249875	4	0.001	0	0	RUNDC3A
chr17	43221220	43221575	356	0.312173	4	0	0	352	ACBD4
chr17	43449055	43449285	231	0.228211	3	0.004	1390586	0
chr17	43974344	43975063	720	0.293584	7	0	864808	0
chr17	44896080	44896166	87	0.222063	4	0.005	0	0	WNT3
chr17	53342740	53343561	822	0.308416	6	0	0	0	HLF
chr17	53800225	53800554	330	0.236583	4	0.002	0	27868	TMEM100
chr17	55888454	55888548	95	0.288405	3	0	27738	38664
chr17	60885491	60885856	366	0.267099	4	0	0	0	2018-03-10
chr17	61553938	61554106	169	0.292184	3	0	30215	0
chr17	70215735	70216332	598	0.263377	3	0	93174	95292
chr17	73083876	73084329	454	0.245663	6	0	0	0	SLC16A5
chr17	73584029	73584108	80	0.231304	4	0.002	38816	0
chr17	77765305	77765733	429	0.249079	3	0.001	3855	0
chr18	11751516	11751566	51	0.221521	3	0.005	0	0	GNAL
chr18	24130851	24131604	754	0.248807	4	0.001	0	0	KCTD1
chr18	32173084	32173227	144	0.272814	4	0	0	98791	DTNA
chr18	55108537	55109119	583	0.245239	4	0.001	0	0	ONECUT2
chr18	59560091	59560365	275	0.255261	4	0	0	129	RNF152
chr18	59560394	59560495	102	0.282876	3	0	89	0
chr19	2253398	2253850	453	0.268882	3	0	0	0	JSRP1
chr19	2282207	2282568	362	0.222027	3	0.005	0	3358	SPPL2B
chr19	5338881	5339092	212	0.243493	3	0.001	0	0	PTPRS
chr19	16186840	16188274	1435	0.274189	9	0	0	0	TPM4
chr19	18415538	18416001	464	0.219274	3	0.005	1038	4488
chr19	35068555	35068710	156	0.294078	3	0	0	0	SCGB1B2P
chr19	35395800	35396475	676	0.220498	5	0.003	5952	0
chr19	38747355	38747378	24	0.253426	3	0	7719	0
chr19	39360313	39360465	153	0.237904	3	0.002	0	0	RINL
chr19	39694617	39694831	215	0.23821	3	0.002	0	0	SYCN
chr19	40871557	40871823	267	0.235532	3	0.002	0	0	PLD3
chr19	41934170	41934313	144	0.230857	3	0.002	0	11377	B3GNT8
chr19	46379929	46380134	206	0.314089	3	0	2873	0
chr19	46800054	46800602	549	0.312195	8	0	0	0	RNU6-66P
chr19	46800054	46800602	549	0.312195	8	0	0	0	HIF3A
chr19	46999274	46999307	34	0.216681	3	0.006	0	0	PPP5D1
chr19	49199965	49200180	216	0.232844	3	0.002	0	0	FUT2
chr19	50015527	50015780	254	0.230282	3	0.003	0	751	FCGRT
chr19	51416010	51416517	508	0.293865	5	0	32186	0
chr19	51522454	51522641	188	0.283526	4	0	0	0	KLK10
chr19	52390810	52391304	495	0.255703	8	0	0	0	ZNF577
chr19	58220080	58220837	758	0.29438	11	0	0	0	ZNF776
chr19	58220080	58220837	758	0.29438	11	0	0	0	ZNF154
chr19	58715677	58716032	356	0.23199	3	0.002	0	0	ZNF274
chr2	17699620	17699773	154	0.264552	6	0	0	20382	RAD51AP2
chr2	20068702	20068906	205	0.22962	3	0.003	0	0	LINC00954
chr2	26624667	26624934	268	0.227575	6	0.003	0	0	DRC1
chr2	27529325	27529981	657	0.264629	4	0	0	0	TRIM54
chr2	29337946	29338258	313	0.297184	9	0	0	0	CLIP4
chr2	39892450	39892612	163	0.229761	3	0.003	25	509
chr2	43019854	43020457	604	0.265142	7	0	429083	0
chr2	43451308	43451868	561	0.274345	6	0	0	0	ZFP36L2
chr2	43864913	43865055	143	0.269696	3	0	0	0	PLEKHH2
chr2	45028712	45029285	574	0.223981	4	0.004	28980	0
chr2	45169548	45169681	134	0.268925	3	0	0	0	SIX3
chr2	45171621	45172169	549	0.277826	3	0	0	0	SIX3
chr2	45176863	45177125	263	0.26887	3	0	3646	0
chr2	46526785	46527098	314	0.225337	3	0.004	0	0	EPAS1
chr2	50575069	50575098	30	0.227601	3	0.004	0	251	NRXN1
chr2	56150255	56150478	224	0.271415	4	0	0	0	EFEMP1
chr2	63283967	63284557	591	0.238151	5	0.001	0	0	OTX1
chr2	63285950	63287082	1133	0.238834	5	0.001	983	0
chr2	66664871	66665428	558	0.219248	3	0.005	0	2532	MEIS1
chr2	68545960	68546038	79	0.211396	3	0.007	0	301	CNRIP1
chr2	71205520	71206291	772	0.239691	5	0	0	0	ANKRD53
chr2	74607470	74607536	67	0.231689	3	0.002	0	11217	DCTN1
chr2	85640762	85640943	182	0.347292	3	0	0	26	CAPG
chr2	87016129	87016436	308	0.251135	3	0.001	0	0	RMND5A
chr2	87016129	87016436	308	0.251135	3	0.001	0	0	CD8A
chr2	96990861	96990982	122	0.244563	3	0.001	79	0
chr2	99553406	99553642	237	0.292423	3	0	60081	0
chr2	123418722	123419093	372	0.265589	5	0	893293	905195
chr2	131595107	131595321	215	0.315283	3	0	69399	0
chr2	149645394	149645798	405	0.263041	4	0	0	0	KIF5C
chr2	160760825	160761244	420	0.227049	3	0.004	0	0	LY75-CD302
chr2	160760825	160761244	420	0.227049	3	0.004	0	0	LY75
chr2	171568412	171568791	380	0.258969	3	0	157	0
chr2	175208588	175208605	18	0.218939	3	0.005	4272	0
chr2	176948693	176948759	67	0.232395	5	0.001	8772	246
chr2	189839015	189839474	460	0.229046	3	0.003	0	466683	COL3A1
chr2	190044504	190044638	135	0.226498	4	0.004	0	261519	COL5A2
chr2	191044980	191045430	451	0.296343	4	0	0	0	C2orf88
chr2	191045632	191045885	254	0.247069	5	0	0	0	C2orf88
chr2	201450506	201450962	457	0.319717	11	0	0	0	AOX1
chr2	219646481	219647360	880	0.302485	5	0	0	0	CYP27A1
chr2	219846796	219847233	438	0.28054	3	0	0	0	FEV
chr2	220117599	220117945	347	0.27692	7	0	0	0	TUBA4A
chr2	223162875	223163033	159	0.223453	3	0.004	0	0	CCDC140
chr2	223162875	223163033	159	0.223453	3	0.004	0	0	PAX3
chr2	228582486	228582688	203	0.246112	3	0.001	0	0	SLC19A3
chr2	228736253	228736357	105	0.262695	4	0	0	0	DAW1
chr2	233498625	233499283	659	0.254226	4	0	0	0	EFHD1
chr2	233741639	233741920	282	0.239851	3	0.001	531	0
chr2	239140182	239140296	115	0.226914	3	0.004	0	0	LOC151174
chr2	241459502	241459847	346	0.231557	3	0.002	0	0	ANKMY1
chr2	241856000	241856143	144	0.229214	3	0.003	37892	0
chr20	623187	623421	235	0.238494	3	0.002	3846	0
chr20	642436	642782	347	0.2719	3	0	0	0	SRXN1
chr20	642436	642782	347	0.2719	3	0	0	0	SCRT2
chr20	3052483	3053037	555	0.242495	3	0.001	0	0	OXT
chr20	3220839	3220985	147	0.24002	3	0.001	951	0
chr20	25129457	25129562	106	0.25171	6	0	30	0
chr20	26190328	26190354	27	0.241564	3	0.001	458	0
chr20	30458634	30458745	112	0.262356	3	0	0	0	TTLL9
chr20	37230326	37230484	159	0.255107	5	0	92	39
chr20	42875765	42875779	15	0.284737	3	0	0	0	GDAP1L1
chr20	44098223	44098724	502	0.334797	8	0	0	0	WFDC2
chr20	45280237	45280288	52	0.249226	3	0.001	0	67	SLC13A3
chr20	45439769	45440346	578	0.267968	5	0	74783	0
chr20	50720731	50721366	636	0.294466	4	0	0	0	ZFP64
chr20	61583910	61583979	70	0.222933	3	0.004	4082	0
chr20	62461159	62461539	381	0.279703	4	0	0	0	ZBTB46
chr20	62693971	62694000	30	0.253447	3	0	0	0	TCEA2
chr21	22369908	22370237	330	0.245133	3	0.001	194481	0
chr21	34775032	34775045	14	0.273453	3	0	29747	392
chr21	45148460	45148864	405	0.232898	3	0.002	0	0	PDXK
chr21	47717406	47718080	675	0.244652	5	0	0	0	YBEY
chr22	17602561	17602610	50	0.264673	3	0	15799	0
chr22	28839137	28839667	531	0.353166	3	0	0	235433	TTC28
chr22	31536476	31536549	74	0.231005	3	0.002	6	19575
chr22	37720696	37721305	610	0.252277	5	0	9306	0
chr22	45608345	45608465	121	0.222476	5	0.003	0	9264	KIAA0930
chr22	46934811	46934981	171	0.221007	3	0.005	87666	0
chr3	25469125	25469573	449	0.271821	6	0	0	235983	RARB
chr3	25469694	25469991	298	0.30455	9	0	0	235565	RARB
chr3	47050950	47051546	597	0.242494	4	0.001	0	0	NBEAL2
chr3	48632484	48632672	189	0.250425	5	0	0	0	COL7A1
chr3	50378425	50378527	103	0.21731	3	0.005	9	0
chr3	62353504	62353894	391	0.241301	3	0.001	34183	397
chr3	64253534	64253818	285	0.261761	6	0	247512	0
chr3	64670459	64670907	449	0.238283	5	0.001	0	180	ADAMTS9-AS2
chr3	64670459	64670907	449	0.238283	5	0.001	0	180	ADAMTS9
chr3	68980539	68981011	473	0.296583	3	0	0	0	FAM19A4
chr3	72787955	72788309	355	0.271622	4	0	10118	0
chr3	87138203	87138400	198	0.271056	3	0	138012	0
chr3	99594893	99595026	134	0.284811	3	0	0	0	MIR548G
chr3	99594893	99595026	134	0.284811	3	0	0	0	FILIP1L
chr3	99594893	99595026	134	0.284811	3	0	0	0	CMSS1
chr3	112051991	112052405	415	0.254975	3	0	0	0	CD200
chr3	122296505	122296778	274	0.259383	3	0	0	0	PARP15
chr3	122745092	122745560	469	0.25681	3	0	0	0	SEMA5B
chr3	125899878	125900108	231	0.303034	7	0	0	309	ALDH1L1-AS2
chr3	125899878	125900108	231	0.303034	7	0	0	309	ALDH1L1
chr3	128564782	128565090	309	0.262171	6	0	31140	0
chr3	129346101	129346288	188	0.219752	3	0.005	20346	0
chr3	133464867	133465180	314	0.232596	3	0.002	0	0	TF
chr3	134083080	134083286	207	0.31002	4	0	0	0	AMOTL2
chr3	136538601	136538934	334	0.222504	3	0.004	0	0	SLC35G2
chr3	138679347	138679578	232	0.297955	4	0	43225	0
chr3	139258822	139258948	127	0.291755	4	0	150	90
chr3	154145810	154146183	374	0.224913	3	0.004	0	164	GPR149
chr3	170746029	170746291	263	0.290187	6	0	167859	0
chr3	181444757	181445647	891	0.270093	9	0	0	0	SOX2-OT
chr3	186490344	186490777	434	0.274586	4	0	10583	0
chr3	193776047	193776240	194	0.301541	4	0	77690	0
chr4	779691	780336	646	0.279692	3	0	0	0	CPLX1
chr4	4862770	4863016	247	0.234376	3	0.002	0	528	MSX1
chr4	5710319	5710411	93	0.315156	6	0	0	0	EVC2
chr4	8271391	8271507	117	0.232057	3	0.002	0	0	HTRA3
chr4	9783192	9783198	7	0.267244	3	0	225254	0
chr4	11428822	11429689	868	0.279734	6	0	0	0	HS3ST1
chr4	16085077	16085716	640	0.290105	8	0	0	0	PROM1
chr4	25657414	25657440	27	0.267786	3	0	0	0	SLC34A2
chr4	41258910	41259044	135	0.2464	3	0.001	0	0	UCHL1
chr4	41867517	41867562	46	0.321656	3	0	69574	0
chr4	41869175	41869348	174	0.264516	3	0	67788	0
chr4	41875193	41875784	592	0.25423	4	0	61352	0
chr4	41882163	41882580	418	0.27881	3	0	54556	0
chr4	41882812	41882953	142	0.228829	3	0.003	54183	0
chr4	47840011	47840136	126	0.222898	4	0.004	0	64	CORIN
chr4	54960034	54960232	199	0.216546	3	0.006	0	1491	PDGFRA
chr4	54965829	54965904	76	0.325704	3	0	0	259	PDGFRA
chr4	54975677	54976184	508	0.261587	4	0	0	0	PDGFRA
chr4	57371589	57372597	1009	0.293439	8	0	0	0	ARL9
chr4	57522493	57522795	303	0.272059	4	0	0	0	HOPX
chr4	74734714	74734874	161	0.23709	3	0.002	14515	44
chr4	85402397	85403223	827	0.225625	5	0.003	100833	0
chr4	87281281	87281511	231	0.261891	4	0	0	233672	MAPK10
chr4	90757378	90757452	75	0.293355	3	0	0	556	SNCA
chr4	101111872	101112317	446	0.266333	3	0	216	374
chr4	140200723	140201100	378	0.234429	3	0.002	0	0	MGARP
chr4	141488964	141489114	151	0.291819	3	0	0	848	UCP1
chr4	154710353	154710373	21	0.217215	3	0.005	83110	0
chr4	154710499	154710535	37	0.24266	3	0.001	83256	0
chr4	183062301	183062576	276	0.211242	3	0.007	0	0	LOC90768
chr4	188916709	188916726	18	0.259392	3	0	198	0
chr4	188916865	188916943	79	0.230676	4	0.002	0	0	ZFP42
chr5	1446165	1446443	279	0.290437	4	0	15098	0
chr5	7849836	7850438	603	0.312841	5	0	0	0	C5orf49
chr5	11588971	11589049	79	0.242204	3	0.001	0	203449	CTNND2
chr5	42952113	42952369	257	0.248287	3	0.001	62461	0
chr5	54516487	54516805	319	0.289636	4	0	0	0	MCIDAS
chr5	58335180	58335681	502	0.308363	3	0	0	0	PDE4D
chr5	59188920	59189724	805	0.231868	6	0.001	0	0	PDE4D
chr5	71015162	71015523	362	0.27366	3	0	0	0	CARTPT
chr5	72529902	72530198	297	0.252616	4	0	317826	0
chr5	74907287	74908125	839	0.250851	4	0.001	0	0	ANKDD1B
chr5	77253833	77253990	158	0.255045	3	0	181647	0
chr5	78365647	78365691	45	0.223234	3	0.004	0	0	BHMT2
chr5	78407678	78408347	670	0.253578	5	0	0	41966	BHMT
chr5	79330929	79331047	119	0.254512	4	0	43840	0
chr5	80690205	80690225	21	0.244972	3	0.001	0	0	RNU5E-1
chr5	101632310	101632341	32	0.248797	5	0	56	0
chr5	112073348	112073538	191	0.3	10	0	0	29430	APC
chr5	115152413	115152494	82	0.271247	6	0	7	0
chr5	122620929	122621289	361	0.235802	5	0.001	97183	115337
chr5	126205009	126205081	73	0.317869	3	0	0	90779	2018-03-03
chr5	134735613	134735654	42	0.241208	3	0.001	44249	351
chr5	137610127	137610448	322	0.291067	8	0	0	0	GFRA3
chr5	139076670	139077047	378	0.254422	4	0	149316	0
chr5	139525657	139525946	290	0.267121	3	0	38059	0
chr5	140749735	140750111	377	0.243946	5	0	0	0	PCDHGB3
chr5	140749735	140750111	377	0.243946	5	0	0	0	PCDHGB2
chr5	140749735	140750111	377	0.243946	5	0	0	0	PCDHGB1
chr5	140749735	140750111	377	0.243946	5	0	0	0	PCDHGA5
chr5	140749735	140750111	377	0.243946	5	0	0	0	PCDHGA4
chr5	140749735	140750111	377	0.243946	5	0	0	0	PCDHGA3
chr5	140749735	140750111	377	0.243946	5	0	0	0	PCDHGA2
chr5	140749735	140750111	377	0.243946	5	0	0	0	PCDHGA1
chr5	140753415	140753449	35	0.221991	3	0.005	0	205	PCDHGB3
chr5	140753415	140753449	35	0.221991	3	0.005	0	205	PCDHGB2
chr5	140753415	140753449	35	0.221991	3	0.005	0	205	PCDHGB1
chr5	140753415	140753449	35	0.221991	3	0.005	0	205	PCDHGA5
chr5	140753415	140753449	35	0.221991	3	0.005	0	205	PCDHGA4
chr5	140753415	140753449	35	0.221991	3	0.005	0	205	PCDHGA3
chr5	140753415	140753449	35	0.221991	3	0.005	0	205	PCDHGA2
chr5	140753415	140753449	35	0.221991	3	0.005	0	205	PCDHGA1
chr5	140772182	140772286	105	0.207068	3	0.008	0	99	PCDHGB3
chr5	140772182	140772286	105	0.207068	3	0.008	0	99	PCDHGB2
chr5	140772182	140772286	105	0.207068	3	0.008	0	99	PCDHGB1
chr5	140772182	140772286	105	0.207068	3	0.008	0	99	PCDHGA7
chr5	140772182	140772286	105	0.207068	3	0.008	0	99	PCDHGA6
chr5	140772182	140772286	105	0.207068	3	0.008	0	99	PCDHGA5
chr5	140772182	140772286	105	0.207068	3	0.008	0	99	PCDHGA4
chr5	140772182	140772286	105	0.207068	3	0.008	0	99	PCDHGA3
chr5	140772182	140772286	105	0.207068	3	0.008	0	99	PCDHGA2
chr5	140772182	140772286	105	0.207068	3	0.008	0	99	PCDHGA1
chr5	140772182	140772286	105	0.207068	3	0.008	0	99	PCDHGB4
chr5	140772182	140772286	105	0.207068	3	0.008	0	99	PCDHGA8
chr5	140810051	140810161	111	0.24149	6	0	0	333	PCDHGA12
chr5	140810051	140810161	111	0.24149	6	0	0	333	PCDHGB7
chr5	140810051	140810161	111	0.24149	6	0	0	333	PCDHGB6
chr5	140810051	140810161	111	0.24149	6	0	0	333	PCDHGB5
chr5	140810051	140810161	111	0.24149	6	0	0	333	PCDHGB3
chr5	140810051	140810161	111	0.24149	6	0	0	333	PCDHGB2
chr5	140810051	140810161	111	0.24149	6	0	0	333	PCDHGB1
chr5	140810051	140810161	111	0.24149	6	0	0	333	PCDHGA11
chr5	140810051	140810161	111	0.24149	6	0	0	333	PCDHGA10
chr5	140810051	140810161	111	0.24149	6	0	0	333	PCDHGA9
chr5	140810051	140810161	111	0.24149	6	0	0	333	PCDHGA7
chr5	140810051	140810161	111	0.24149	6	0	0	333	PCDHGA6
chr5	140810051	140810161	111	0.24149	6	0	0	333	PCDHGA5
chr5	140810051	140810161	111	0.24149	6	0	0	333	PCDHGA4
chr5	140810051	140810161	111	0.24149	6	0	0	333	PCDHGA3
chr5	140810051	140810161	111	0.24149	6	0	0	333	PCDHGA2
chr5	140810051	140810161	111	0.24149	6	0	0	333	PCDHGA1
chr5	140810051	140810161	111	0.24149	6	0	0	333	PCDHGB4
chr5	140810051	140810161	111	0.24149	6	0	0	333	PCDHGA8
chr5	140810805	140811102	298	0.29842	3	0	0	0	PCDHGA12
chr5	140810805	140811102	298	0.29842	3	0	0	0	PCDHGB7
chr5	140810805	140811102	298	0.29842	3	0	0	0	PCDHGB6
chr5	140810805	140811102	298	0.29842	3	0	0	0	PCDHGB5
chr5	140810805	140811102	298	0.29842	3	0	0	0	PCDHGB3
chr5	140810805	140811102	298	0.29842	3	0	0	0	PCDHGB2
chr5	140810805	140811102	298	0.29842	3	0	0	0	PCDHGB1
chr5	140810805	140811102	298	0.29842	3	0	0	0	PCDHGA11
chr5	140810805	140811102	298	0.29842	3	0	0	0	PCDHGA10
chr5	140810805	140811102	298	0.29842	3	0	0	0	PCDHGA9
chr5	140810805	140811102	298	0.29842	3	0	0	0	PCDHGA7
chr5	140810805	140811102	298	0.29842	3	0	0	0	PCDHGA6
chr5	140810805	140811102	298	0.29842	3	0	0	0	PCDHGA5
chr5	140810805	140811102	298	0.29842	3	0	0	0	PCDHGA4
chr5	140810805	140811102	298	0.29842	3	0	0	0	PCDHGA3
chr5	140810805	140811102	298	0.29842	3	0	0	0	PCDHGA2
chr5	140810805	140811102	298	0.29842	3	0	0	0	PCDHGA1
chr5	140810805	140811102	298	0.29842	3	0	0	0	PCDHGB4
chr5	140810805	140811102	298	0.29842	3	0	0	0	PCDHGA8
chr5	140864020	140864834	815	0.261982	9	0	0	0	PCDHGA12
chr5	140864020	140864834	815	0.261982	9	0	0	0	PCDHGC3
chr5	140864020	140864834	815	0.261982	9	0	0	0	PCDHGC4
chr5	140864020	140864834	815	0.261982	9	0	0	0	PCDHGB7
chr5	140864020	140864834	815	0.261982	9	0	0	0	PCDHGB6
chr5	140864020	140864834	815	0.261982	9	0	0	0	PCDHGB5
chr5	140864020	140864834	815	0.261982	9	0	0	0	PCDHGB3
chr5	140864020	140864834	815	0.261982	9	0	0	0	PCDHGB2
chr5	140864020	140864834	815	0.261982	9	0	0	0	PCDHGB1
chr5	140864020	140864834	815	0.261982	9	0	0	0	PCDHGA11
chr5	140864020	140864834	815	0.261982	9	0	0	0	PCDHGA10
chr5	140864020	140864834	815	0.261982	9	0	0	0	PCDHGA9
chr5	140864020	140864834	815	0.261982	9	0	0	0	PCDHGA7
chr5	140864020	140864834	815	0.261982	9	0	0	0	PCDHGA6
chr5	140864020	140864834	815	0.261982	9	0	0	0	PCDHGA5
chr5	140864020	140864834	815	0.261982	9	0	0	0	PCDHGA4
chr5	140864020	140864834	815	0.261982	9	0	0	0	PCDHGA3
chr5	140864020	140864834	815	0.261982	9	0	0	0	PCDHGA2
chr5	140864020	140864834	815	0.261982	9	0	0	0	PCDHGA1
chr5	140864020	140864834	815	0.261982	9	0	0	0	PCDHGB4
chr5	140864020	140864834	815	0.261982	9	0	0	0	PCDHGA8
chr5	140892677	140893101	425	0.360693	3	0	128	0
chr5	141705411	141705539	129	0.287519	3	0	171402	0
chr5	149535646	149535695	50	0.288627	3	0	10648	10332
chr5	151066460	151066730	271	0.282327	6	0	0	71262	SPARC
chr5	154230141	154230438	298	0.311011	5	0	0	6570	FAXDC2
chr5	156886982	156886996	15	0.23449	3	0.002	0	0	ADAM19
chr5	158524270	158524649	380	0.245677	3	0.001	0	0	EBF1
chr5	169064071	169064530	460	0.291118	3	0	0	0	DOCK2
chr5	172655925	172656055	131	0.228536	4	0.004	64534	0
chr5	179220545	179221059	515	0.245782	4	0.001	0	1549	LTC4S
chr5	179220545	179221059	515	0.245782	4	0.001	0	1549	MAML1
chr5	180017689	180018465	777	0.284129	5	0	0	0	SCGB3A1
chr5	180018503	180018722	220	0.302134	4	0	13149	0
chr6	1624978	1625574	597	0.280612	5	0	0	0	GMDS
chr6	2841626	2842255	630	0.27788	8	0	0	0	SERPINB1
chr6	2903258	2903704	447	0.246617	5	0	0	0	SERPINB9
chr6	4775132	4775222	91	0.275628	3	0	0	0	CDYL
chr6	10426588	10426657	70	0.273194	3	0	1360	0
chr6	10881891	10882043	153	0.261949	4	0	0	0	SYCP2L
chr6	10881891	10882043	153	0.261949	4	0	0	0	GCM2
chr6	10882238	10882336	99	0.318072	5	0	0	186	SYCP2L
chr6	10887023	10887185	163	0.220863	4	0.005	0	0	SYCP2L
chr6	21666666	21666834	169	0.235543	3	0.002	0	0	CASC15
chr6	21667166	21667815	650	0.254492	4	0	0	303	CASC15
chr6	26017280	26018084	805	0.258687	7	0	0	2587	HIST1H1A
chr6	26189234	26189379	146	0.227458	4	0.004	0	0	HIST1H4D
chr6	26240782	26240939	158	0.216653	3	0.006	0	0	HIST1H4F
chr6	26271587	26271827	241	0.269075	5	0	0	0	HIST1H3G
chr6	27064769	27065003	235	0.269125	3	0	35091	0
chr6	27235822	27235891	70	0.30778	3	0	40950	7457
chr6	28367279	28367749	471	0.251168	7	0	0	0	ZSCAN12
chr6	28521796	28521837	42	0.248646	3	0.001	38225	33026
chr6	29795595	29796032	438	0.227899	3	0.004	1312024	0
chr6	29855302	29855636	335	0.246778	6	0	1371731	0
chr6	29894619	29894820	202	0.304892	6	0	1411048	0
chr6	29895016	29895074	59	0.237117	3	0.002	1411445	0
chr6	29943401	29943414	14	0.210232	3	0.008	1459830	988
chr6	29943455	29943480	26	0.242318	4	0.001	1459884	922
chr6	29974717	29974773	57	0.230355	4	0.003	1491146	0
chr6	29974810	29975080	271	0.325503	12	0	1491239	0
chr6	29975366	29975427	62	0.222546	3	0.004	1491795	0
chr6	30095174	30095265	92	0.278313	7	0	1611603	0
chr6	30095295	30095549	255	0.246611	8	0	1611724	0
chr6	30228058	30228083	26	0.274009	4	0	1744487	0
chr6	30418773	30418845	73	0.216432	3	0.006	1935202	0
chr6	30711073	30711206	134	0.261241	6	0	2227502	0
chr6	30711636	30711802	167	0.244457	7	0	2228065	0
chr6	30720261	30720491	231	0.229365	4	0.003	2236690	7820
chr6	31831340	31831434	95	0.257964	3	0	3347769	391
chr6	32120625	32120783	159	0.217555	3	0.005	3637054	1046
chr6	32120933	32121055	123	0.228898	3	0.003	3637362	774
chr6	32121156	32121261	106	0.272075	6	0	3637585	568
chr6	32121368	32121433	66	0.226893	4	0.004	3637797	396
chr6	32223076	32223341	266	0.264545	9	0	3739505	58692
chr6	32977217	32977254	38	0.242444	3	0.001	419603	1290
chr6	34984836	34984930	95	0.228322	3	0.004	0	123871	ANKS1A
chr6	35479628	35479910	283	0.261014	3	0	0	0	TULP1
chr6	42738967	42739049	83	0.26882	3	0	10740	11400
chr6	43211208	43211235	28	0.242661	3	0.001	0	0	TTBK1
chr6	44187031	44187055	25	0.227496	3	0.004	186	131
chr6	44310345	44310445	101	0.256282	3	0	0	29146	SPATS1
chr6	44528793	44529157	365	0.253942	5	0	110631	166037
chr6	50808627	50808813	187	0.222759	4	0.004	0	1829	TFAP2B
chr6	50818862	50819236	375	0.218801	3	0.005	3535	430
chr6	79620363	79620685	323	0.277484	3	0	0	0	IRAK1BP1
chr6	108440118	108440339	222	0.312886	3	0	44176	0
chr6	108489795	108490895	1101	0.234771	6	0.001	0	0	NR2E1
chr6	116691382	116691863	482	0.267325	5	0	0	0	DSE
chr6	121758653	121758980	328	0.275521	4	0	0	102630	GJA1
chr6	127835990	127836159	170	0.240349	4	0.001	0	0	SOGA3
chr6	133562267	133562275	9	0.21222	3	0.007	0	0	EYA4
chr6	133562479	133562494	16	0.251703	4	0	0	0	EYA4
chr6	137242062	137242316	255	0.23965	4	0.001	1085	0
chr6	137814078	137814971	894	0.254852	5	0	0	0	OLIG3
chr6	146136371	146136749	379	0.312074	4	0	0	0	LOC100507557
chr7	1270558	1270925	368	0.230154	3	0.003	1728	0
chr7	1283896	1283981	86	0.283198	3	0	190013	0
chr7	16505589	16505664	76	0.269763	5	0	0	44323	SOSTDC1
chr7	18535232	18535767	536	0.25508	6	0	0	408222	HDAC9
chr7	19184555	19184961	407	0.243695	3	0.001	0	0	FERD3L
chr7	21209165	21209509	345	0.257807	3	0	382656	257137
chr7	27196153	27196555	403	0.292805	9	0	0	0	HOXA7
chr7	28998195	28998346	152	0.250321	3	0.001	21236	0
chr7	29185965	29186267	303	0.278063	8	0	0	47437	CHN2
chr7	29185965	29186267	303	0.278063	8	0	0	47437	CPVL
chr7	39453532	39453704	173	0.211813	3	0.007	0	0	POU6F2
chr7	39649224	39649443	220	0.264674	5	0	0	0	LOC646999
chr7	45613410	45613725	316	0.250618	3	0.001	13	0
chr7	49813065	49813486	422	0.266061	5	0	0	0	VWC2
chr7	51538921	51539190	270	0.254393	3	0	154405	82086
chr7	54956202	54956419	218	0.281961	4	0	130305	0
chr7	79083445	79083509	65	0.241016	4	0.001	0	0	MAGI2-AS3
chr7	92672812	92672950	139	0.239481	3	0.002	206870	0
chr7	95025611	95025855	245	0.266342	6	0	0	0	PON1
chr7	95025611	95025855	245	0.266342	6	0	0	0	PON3
chr7	95026066	95026106	41	0.282007	6	0	89106	0
chr7	96626151	96626659	509	0.222124	3	0.005	0	4724	DLX6-AS1
chr7	97361026	97361408	383	0.324944	8	0	0	0	TAC1
chr7	100464771	100465657	887	0.234435	7	0	0	624	TRIP6
chr7	100488527	100489022	496	0.252241	4	0	0	433	ACHE
chr7	102553293	102553457	165	0.245453	5	0	0	161649	LRRC17
chr7	102553293	102553457	165	0.245453	5	0	0	161649	FBXL13
chr7	116140128	116140593	466	0.30093	4	0	0	0	CAV1
chr7	116140128	116140593	466	0.30093	4	0	0	0	CAV2
chr7	116164670	116164709	40	0.26467	3	0	0	0	CAV1
chr7	117119601	117120064	464	0.267876	6	0	0	51934	CFTR
chr7	121956740	121956890	151	0.217753	3	0.005	1587	0
chr7	127671044	127671195	152	0.234718	3	0.002	0	0	SND1
chr7	127672152	127672658	507	0.286935	7	0	0	0	SND1
chr7	129425330	129425858	529	0.257564	5	0	44714	0
chr7	131242787	131242962	176	0.219379	3	0.005	565128	0
chr7	139208852	139208979	128	0.232925	3	0.002	0	0	CLEC2L
chr7	143579665	143580147	483	0.418386	4	0	0	1978	TCAF1
chr7	143582308	143582630	323	0.310602	3	0	0	0	TCAF1
chr7	148394842	148394994	153	0.262102	3	0	109469	436
chr7	149112142	149112402	261	0.315554	3	0	16051	0
chr7	149389669	149389941	273	0.254224	4	0	67787	0
chr7	150652808	150653195	388	0.319954	7	0	0	0	KCNH2
chr7	155166290	155166554	265	0.217891	3	0.005	64344	0
chr7	155255122	155255310	189	0.244699	3	0.001	0	0	EN2
chr7	156797988	156798810	823	0.237936	4	0.002	0	0	MNX1
chr7	156871073	156871234	162	0.267434	3	0	61954	0
chr7	157361396	157362094	699	0.268649	7	0	0	0	PTPRN2
chr7	157484045	157484647	603	0.268477	5	0	0	0	PTPRN2
chr7	157561786	157561925	140	0.21877	3	0.005	0	590	PTPRN2
chr8	10872604	10872648	45	0.220482	3	0.005	0	676	XKR6
chr8	22960397	22960461	65	0.218137	3	0.005	0	0	LOC254896
chr8	22960397	22960461	65	0.218137	3	0.005	0	0	TNFRSF10C
chr8	23563859	23563970	112	0.238773	3	0.002	0	0	NKX2-6
chr8	23564025	23564591	567	0.226671	6	0.003	0	0	NKX2-6
chr8	23567310	23567658	349	0.275059	5	0	131775	0
chr8	41655673	41655894	222	0.269274	4	0	0	0	ANK1
chr8	42356637	42356871	235	0.22902	3	0.003	0	39364	SLC20A2
chr8	49468684	49468941	258	0.304559	5	0	154409	0
chr8	54789207	54789978	772	0.288232	4	0	0	0	RGS20
chr8	56852148	56852290	143	0.279047	3	0	0	58822	LYN
chr8	59058254	59058656	403	0.261776	4	0	0	0	FAM110B
chr8	86350390	86350592	203	0.27537	4	0	0	173	CA13
chr8	104153592	104153643	52	0.214954	4	0.006	0	201	BAALC
chr8	105478683	105479058	376	0.237272	3	0.002	0	0	DPYS
chr8	120650994	120651652	659	0.300538	6	0	0	193146	ENPP2
chr8	121137879	121138232	354	0.231487	3	0.002	0	100	COL14A1
chr8	140714489	140714610	122	0.263656	3	0	0	0	KCNK9
chr8	144852873	144853229	357	0.215032	3	0.006	19860	0
chr8	145025059	145025178	120	0.258831	5	0	0	0	PLEC
chr9	27528999	27529907	909	0.277133	4	0	0	0	MOB3B
chr9	98784231	98784351	121	0.252057	3	0	193	0
chr9	113800909	113801337	429	0.259668	3	0	0	0	LPAR1
chr9	124498633	124498961	329	0.28166	3	0	0	0	DAB2IP
chr9	124982087	124982834	748	0.226491	3	0.004	0	0	LHX6
chr9	133320728	133320948	221	0.242284	3	0.001	0	0	ASS1
chrX	13587603	13588301	699	0.291383	6	0	0	0	EGFL6
chrX	21676344	21676605	262	0.242591	5	0	0	0	KLHL34
chrX	25033890	25034488	599	0.256024	9	0	0	0	ARX
chrX	40004346	40004481	136	0.236874	3	0.002	0	0	BCOR
chrX	47433374	47433716	343	0.244205	3	0.001	0	0	SYN1
chrX	47441605	47441779	175	0.245498	3	0.001	0	7480	SYN1
chrX	47441605	47441779	175	0.245498	3	0.001	0	7480	TIMP1
chrX	49022996	49023115	120	0.240622	3	0.001	0	0	MAGIX
chrX	50556917	50557055	139	0.253083	4	0	0	0	SHROOM4
chrX	50557122	50557522	401	0.276702	3	0	77	0
chrX	56258440	56258900	461	0.250635	6	0	0	51	KLF8
chrX	56259040	56259373	334	0.322381	4	0	0	0	KLF8
chrX	68348465	68348597	133	0.250301	3	0.001	31983	0
chrX	68525613	68525883	271	0.28285	3	0	199194	0
chrX	70150787	70151209	423	0.269354	6	0	0	0	SLC7A3
chrX	73641881	73642885	1005	0.270835	7	0	0	0	SLC16A2
chrX	100446496	100446736	241	0.312241	3	0	28196	0
chrX	101905837	101906288	452	0.30055	5	0	0	0	ARMCX5-GPRASP2
chrX	102000698	102000905	208	0.236864	4	0.002	0	0	BHLHB9
chrX	106750120	106750612	493	0.303454	5	0	205839	0
chrX	107681397	107681737	341	0.326424	4	0	0	294122	COL4A6
chrX	119134323	119135074	752	0.259457	5	0	107936	0
chrX	119444909	119445407	499	0.262109	7	0	0	0	TMEM255A
chrX	122317614	122317633	20	0.260818	3	0	462	1119
chrX	134124955	134125259	305	0.272471	5	0	0	0	SMIM10
chrX	134654287	134654347	61	0.239572	3	0.001	207	755
chrX	137792814	137793096	283	0.308451	3	0	0	0	FGF13
chrX	142721195	142721909	715	0.264786	5	0	0	0	SLITRK4
chrX	142723457	142723826	370	0.22662	4	0.004	0	498	SLITRK4
chrX	153094332	153094967	636	0.285663	4	0	0	0	PDZD4
chrX	154842535	154842841	307	0.307325	5	0	0	0	TMLHE

## Sheet: Tablse S6_CNV
Table S6- CNV changes in prostate cancer from different tumors overlapping a total of 33 reduced genomic coordinates
Chr	Start	End	Width	Markers	Segment logRatio mean	Number of CNV Loss per region	Number of CNV Gain per region	Number of total CNVs per region	Distance to gene (bp)	Distance to CpG	Gene
chr1	2461820	2461929	110	6	0.2046	0	2	2	135	0
chr1	2461820	2461929	110	6	0.2167	0	2	2	135	0
chr2	2713385	2726500	13116	5	0.2043	0	3	3	378339	28242
chr2	2713323	2726500	13178	6	0.2056	0	3	3	378277	28242
chr2	2726260	2732572	6313	5	0.2168	0	3	3	391214	22170
chr2	26401640	26402008	369	5	0.2041	0	2	2	0	0	GAREM2
chr2	26401640	26402008	369	5	0.2053	0	2	2	0	0	GAREM2
chr2	29338077	29338258	182	6	0.2451	0	7	7	0	0	CLIP4
chr2	29338077	29338258	182	6	0.2616	0	7	7	0	0	CLIP4
chr2	29338077	29338121	45	5	0.2289	0	7	7	0	0	CLIP4
chr2	29338077	29338258	182	6	0.2079	0	7	7	0	0	CLIP4
chr2	29338077	29338258	182	6	0.207	0	7	7	0	0	CLIP4
chr2	29338077	29338258	182	6	0.257	0	7	7	0	0	CLIP4
chr2	29338077	29338258	182	6	0.2289	0	7	7	0	0	CLIP4
chr2	130955686	130956199	514	5	-0.3129	2	0	2	0	0	TUBA3E
chr2	130955686	130956199	514	5	-0.3559	2	0	2	0	0	TUBA3E
chr2	236671717	236672961	1245	5	-0.5629	2	0	2	0	342	AGAP1
chr2	236671717	236672961	1245	5	-0.5166	2	0	2	0	342	AGAP1
chr4	5710319	5710411	93	6	0.2356	0	2	2	0	0	EVC2
chr4	5710319	5710411	93	6	0.252	0	2	2	0	0	EVC2
chr4	25657365	25657440	76	6	0.2069	0	2	2	0	0	SLC34A2
chr4	25657160	25657440	281	7	0.2022	0	2	2	0	0	SLC34A2
chr6	29911004	29911295	292	11	0.312	0	2	2	1427433	0
chr6	29910755	29911265	511	16	0.2153	0	2	2	1427184	0
chr6	31276434	31276664	231	5	-0.4625	2	0	2	2792863	0
chr6	31276418	31276653	236	5	-0.3302	2	0	2	2792847	0
chr6	31324621	31325000	380	10	-0.4039	2	0	2	2841050	0
chr6	31324621	31325000	380	10	-0.4707	2	0	2	2841050	0
chr6	114225012	114253319	28308	5	-0.3382	2	0	2	0	38092	FLJ34503
chr6	114225012	114253319	28308	5	-0.4075	2	0	2	0	38092	FLJ34503
chr7	2754753	2756996	2244	5	-0.3316	2	0	2	0	1008	AMZ1
chr7	2754753	2756996	2244	5	-0.3293	2	0	2	0	1008	AMZ1
chr7	57071041	57078300	7260	10	0.2158	0	2	2	109025	0
chr7	57071676	57076951	5276	7	0.2359	0	2	2	110374	0
chr7	63057446	63088877	31432	5	-0.3413	1	1	2	416943	0
chr7	63085215	63151988	66774	5	0.2173	1	1	2	353832	0
chr7	150652864	150653195	332	6	0.2271	0	2	2	0	0	KCNH2
chr7	150652864	150653195	332	6	0.2123	0	2	2	0	0	KCNH2
chr8	216453	216788	336	5	-0.3277	2	0	2	19113	0
chr8	215923	216788	866	6	-0.3021	2	0	2	18583	0
chr8	2106183	2122339	16157	5	-0.3849	3	0	3	12802	7524
chr8	2106183	2122339	16157	5	-0.3182	3	0	3	12802	7524
chr8	2112369	2127340	14972	5	-0.3215	3	0	3	18988	2523
chr8	145025059	145025178	120	5	0.2195	0	3	3	0	0	PLEC
chr8	145025059	145025178	120	5	0.212	0	3	3	0	0	PLEC
chr8	145025059	145025178	120	5	0.208	0	3	3	0	0	PLEC
chr10	43697817	43698141	325	5	0.2007	0	2	2	0	0	RASGEF1A
chr10	43697849	43698834	986	5	0.2009	0	2	2	0	0	RASGEF1A
chr10	102444675	102467056	22382	5	0.2152	0	2	2	155038	2750
chr10	102444675	102467056	22382	5	0.2468	0	2	2	155038	2750
chr10	134121577	134121712	136	5	-0.3191	2	0	2	0	0	STK32C
chr10	134121577	134121712	136	5	-0.3015	2	0	2	0	0	STK32C
chr11	22214554	22214934	381	5	-0.4099	2	0	2	0	0	ANO5
chr11	22214554	22214934	381	5	-0.3119	2	0	2	0	0	ANO5
chr12	3862221	3862575	355	10	0.2082	0	2	2	0	0	CRACR2A
chr12	3862221	3862457	237	7	0.2053	0	2	2	0	0	CRACR2A
chr12	53183930	53186067	2138	5	0.2062	0	4	4	0	0	KRT3
chr12	53183773	53186067	2295	6	0.2365	0	4	4	0	0	KRT3
chr12	53183773	53184086	314	5	0.2316	0	4	4	0	0	KRT3
chr12	53183773	53184086	314	5	0.2387	0	4	4	0	0	KRT3
chr13	96204856	96204978	123	6	0.2104	0	2	2	0	0	CLDN10
chr13	96204854	96205295	442	9	0.2404	0	2	2	0	0	CLDN10
chr15	45421998	45422095	98	6	0.2257	0	8	8	0	0	DUOXA1
chr15	45421998	45422325	328	7	0.2525	0	8	8	0	0	DUOX1
chr15	45421998	45422325	328	7	0.2525	0	8	8	0	0	DUOXA1
chr15	45421998	45422325	328	7	0.2182	0	8	8	0	0	DUOX1
chr15	45421998	45422325	328	7	0.2182	0	8	8	0	0	DUOXA1
chr15	45421998	45422325	328	7	0.226	0	8	8	0	0	DUOX1
chr15	45421998	45422325	328	7	0.226	0	8	8	0	0	DUOXA1
chr15	45421860	45422325	466	9	0.2855	0	8	8	0	0	DUOX1
chr15	45421860	45422325	466	9	0.2855	0	8	8	0	0	DUOXA1
chr15	45421998	45422325	328	7	0.2229	0	8	8	0	0	DUOX1
chr15	45421998	45422325	328	7	0.2229	0	8	8	0	0	DUOXA1
chr15	45421998	45422325	328	7	0.2023	0	8	8	0	0	DUOX1
chr15	45421998	45422325	328	7	0.2023	0	8	8	0	0	DUOXA1
chr15	45421998	45422325	328	7	0.2717	0	8	8	0	0	DUOX1
chr15	45421998	45422325	328	7	0.2717	0	8	8	0	0	DUOXA1
chr17	30592521	30593034	514	7	-0.3621	2	0	2	160	164
chr17	30592521	30593009	489	5	-0.3193	2	0	2	185	189
chr17	78808570	78809873	1304	5	-0.3047	2	0	2	0	8567	RPTOR
chr17	78808570	78809873	1304	5	-0.3107	2	0	2	0	8567	RPTOR
chr19	55035609	55038337	2729	5	0.2618	0	2	2	13708	0
chr19	55035609	55038337	2729	5	0.2483	0	2	2	13708	0
chrX	21676344	21676605	262	5	0.2095	0	3	3	0	0	KLHL34
chrX	21676344	21676605	262	5	0.2168	0	3	3	0	0	KLHL34
chrX	21676344	21676605	262	5	0.2158	0	3	3	0	0	KLHL34
chrX	48858776	48858921	146	6	-0.3813	4	0	4	100	32182
chrX	48858776	48858904	129	5	-0.3124	4	0	4	100	32182
chrX	48858688	48858832	145	5	-0.3121	4	0	4	12	32094
chrX	48858688	48858832	145	5	-0.3187	4	0	4	12	32094
chrX	152938698	152938907	210	5	0.2756	0	3	3	0	0	PNCK
chrX	152938698	152938907	210	5	0.2283	0	3	3	0	0	PNCK
chrX	152938698	152938907	210	5	0.2594	0	3	3	0	0	PNCK

## Sheet: Table S7- 4-CpGs
Table S7- Four CpGs used in the classification model
Probe ID	Chr	Position	Gene	Enhancer	DHS	Island	Gene location	Coefficient
cg13914893	chr9	137980958	OLFM1	No	No	S_Shore	Body	2.063
cg08857201	chr15	56536865	RFX7	No	No	S_Shore	TSS1500	1.026
cg04207084	chr7	157477846	PTPRN2	No	No	Island	Body	4.717
cg07858113	chr6	30711561	IER3;FLOT1	No	No	Island	3'UTR;TSS1500	0.22
Model intercept: -1.687; DHS: DNase hypersensitive site; TSS1500: 1,500 bp away from transcription start site
The following equation is used to calculate the dicision values:
Where, Y is the decision value. Postive values represent tumor and negative values indicate the sample is benign.
The following equation outputs the proabability of having a tumor:
P =

## Sheet: Table S8- Predictions
Table S8- prediction scores generated for the validating dataset
Array file	Prediction score	True class
GSM1162363_6264509108_R01C02	0.285	Benign
GSM1162364_6264509130_R04C02	0.915	Cancer
GSM1162365_6264509130_R03C02	0.918	Cancer
GSM1162369_6264509130_R06C01	0.89	Cancer
GSM1162375_6264509130_R05C01	0.963	Cancer
GSM1162380_6285609104_R03C02	0.435	Benign
GSM1162381_6285650040_R06C02	0.296	Benign
GSM1162382_6285650050_R01C01	0.233	Benign
GSM2221447_5765141020_R01C01	0.931	Cancer
GSM2221448_5765141020_R02C01	0.951	Cancer
GSM2221449_5765141020_R03C01	0.959	Cancer
GSM2221450_5765141020_R04C01	0.964	Cancer
GSM2221451_5765141020_R05C01	0.974	Cancer
GSM2221452_5765141020_R02C02	0.896	Cancer
GSM2221453_5765141020_R03C02	0.918	Cancer
GSM2221454_5765141020_R04C02	0.93	Cancer
GSM2221455_5765141020_R05C02	0.904	Cancer
GSM2221456_5765141020_R06C02	0.952	Cancer
GSM2221457_5760666013_R01C01	0.939	Cancer
GSM2221458_5760666013_R02C01	0.947	Cancer
GSM2221459_5760666013_R03C01	0.897	Cancer
GSM2221460_5760666013_R04C01	0.917	Cancer
GSM2221461_5760666013_R05C01	0.909	Cancer
GSM2221462_5760666013_R01C02	0.951	Cancer
GSM2221463_5760666013_R02C02	0.904	Cancer
GSM2221464_5760666013_R03C02	0.967	Cancer
GSM2221465_5760666013_R04C02	0.892	Cancer
GSM2221466_5760666013_R06C02	0.905	Cancer
GSM2221467_5760666015_R01C01	0.931	Cancer
GSM2221468_5760666015_R05C01	0.885	Cancer
GSM2221469_5760666031_R01C01	0.921	Cancer
GSM2221470_5760666031_R03C01	0.949	Cancer
GSM2221471_5760666031_R04C01	0.805	Cancer
GSM2221476_5760666031_R03C02	0.899	Cancer
GSM2221479_5760666032_R01C01	0.932	Cancer
GSM2221480_5760666032_R02C01	0.873	Cancer
GSM2221481_5760666032_R03C01	0.903	Cancer
GSM2221482_5760666032_R04C01	0.91	Cancer
GSM2221483_5760666032_R05C01	0.959	Cancer
GSM2221484_5760666032_R06C01	0.949	Cancer
GSM2221485_5760666032_R01C02	0.919	Cancer
GSM2221486_5760666032_R02C02	0.672	Cancer
GSM2221487_5760666032_R03C02	0.928	Cancer
GSM2221488_5760666032_R04C02	0.956	Cancer
GSM2221489_5760666032_R06C02	0.939	Cancer
GSM2221490_5765141021_R01C01	0.857	Cancer
GSM2221491_5765141021_R02C01	0.869	Cancer
GSM2221492_5765141021_R03C01	0.912	Cancer
GSM2221493_5765141021_R05C01	0.898	Cancer
GSM2221494_5765141021_R06C01	0.957	Cancer
GSM2221495_5765141021_R03C02	0.889	Cancer
GSM2221496_5765141021_R04C02	0.907	Cancer
GSM2221497_5765141021_R06C02	0.968	Cancer
GSM2221498_5765141034_R02C01	0.847	Cancer
GSM2221499_5765141034_R03C01	0.913	Cancer
GSM2221500_5765141034_R04C01	0.942	Cancer
GSM2221501_5765141034_R05C01	0.928	Cancer
GSM2221502_5765141034_R06C01	0.866	Cancer
GSM2221503_5765141034_R01C02	0.92	Cancer
GSM2221504_5765141034_R02C02	0.93	Cancer
GSM2221505_5765141034_R03C02	0.869	Cancer
GSM2221506_5765141034_R05C02	0.951	Cancer
GSM2221507_5765141034_R06C02	0.924	Cancer
GSM2221508_5765141036_R01C01	0.844	Cancer
GSM2221509_5765141036_R02C01	0.933	Cancer
GSM2221510_5765141036_R03C01	0.835	Cancer
GSM2221511_5765141036_R04C01	0.891	Cancer
GSM2221512_5765141036_R05C01	0.946	Cancer
GSM2221513_5765141036_R06C01	0.802	Cancer
GSM2221514_5765141036_R01C02	0.854	Cancer
GSM2221515_5765141036_R02C02	0.885	Cancer
GSM2221516_5765141036_R03C02	0.839	Cancer
GSM2221517_5765141036_R04C02	0.719	Cancer
GSM2221518_5765141036_R05C02	0.946	Cancer
GSM2221519_5765141036_R06C02	0.949	Cancer
GSM2221520_5765141040_R01C01	0.932	Cancer
GSM2221521_5765141040_R02C01	0.818	Cancer
GSM2221522_5765141040_R03C01	0.895	Cancer
GSM2221523_5765141040_R04C01	0.929	Cancer
GSM2221524_5765141040_R05C01	0.933	Cancer
GSM2221525_5765141040_R06C01	0.646	Cancer
GSM2221526_5765141040_R01C02	0.888	Cancer
GSM2221527_5765141040_R02C02	0.92	Cancer
GSM2221528_5765141040_R04C02	0.943	Cancer
GSM2221529_5765141040_R05C02	0.964	Cancer
GSM2221530_5765141041_R01C01	0.905	Cancer
GSM2221531_5765141041_R02C01	0.299	Cancer
GSM2221532_5765141041_R04C01	0.935	Cancer
GSM2221533_5765141041_R01C02	0.67	Cancer
GSM2221534_5765141041_R02C02	0.869	Cancer
GSM2221535_5765141041_R03C02	0.933	Cancer
GSM2221536_5765141041_R05C02	0.861	Cancer
GSM2221537_5765141041_R06C02	0.93	Cancer
GSM2221538_5765141048_R02C01	0.943	Cancer
GSM2221539_5765141048_R03C01	0.906	Cancer
GSM2221553_5760666036_R01C01	0.801	Cancer
GSM2221554_5760666036_R02C01	0.925	Cancer
GSM2221555_5760666036_R03C01	0.916	Cancer
GSM2221556_5760666036_R04C01	0.935	Cancer
GSM2221557_5760666036_R05C01	0.943	Cancer
GSM2221558_5760666049_R06C02	0.943	Cancer
GSM2221559_5760666050_R01C01	0.953	Cancer
GSM2221560_5760666050_R02C01	0.924	Cancer
GSM2221561_5760666050_R03C01	0.93	Cancer
GSM2221562_3999510001_R04C01	0.817	Cancer
GSM2221566_3999510001_R02C02	0.919	Cancer
GSM2221567_3999510001_R03C02	0.816	Cancer
GSM2221568_3999510001_R04C02	0.869	Cancer
GSM2221604_5760666032_R05C02	0.897	Cancer
GSM2221605_5765141021_R04C01	0.862	Cancer
GSM2221606_5765141048_R01C01	0.749	Cancer
GSM2221607_5765141048_R04C01	0.517	Cancer
GSM937258_7676960077_R01C01	0.966	Metastasis_bone
GSM937259_7676960077_R01C02	0.873	Metastasis_lymph
GSM937260_7676960077_R02C01	0.913	Metastasis_lymph
GSM937261_7676960077_R02C02	0.871	Metastasis_soft_tissue
GSM937262_7676960077_R03C01	0.953	Cancer
GSM937263_7676960077_R03C02	0.319	Benign
GSM937264_7676960077_R04C01	0.981	Metastasis_bone
GSM937265_7676960077_R04C02	0.284	Benign
GSM937266_7676960077_R05C01	0.935	Cancer
GSM937267_7676960077_R05C02	0.411	Benign
GSM937268_7676960077_R06C01	0.97	Metastasis_bone
GSM937269_7676960077_R06C02	0.215	Benign
GSM2041110	0.852	Cancer
GSM2041111	0.222	Cancer
GSM2041112	0.57	Cancer
GSM2041113	0.672	Cancer
GSM2041114	0.551	Cancer
GSM2041115	0.461	Cancer
GSM2041116	0.835	Cancer
GSM2041117	0.739	Cancer
GSM2041118	0.827	Cancer
GSM2041119	0.903	Cancer
GSM2041120	0.85	Cancer
GSM2041121	0.347	Cancer
GSM2041122	0.589	Cancer
GSM2041123	0.946	Cancer
GSM2041124	0.632	Cancer
GSM2041125	0.842	Cancer
GSM2041126	0.582	Cancer
GSM2041127	0.728	Cancer
GSM2041128	0.766	Cancer
GSM2041129	0.439	Cancer
GSM2041130	0.766	Cancer
GSM2041131	0.582	Cancer
GSM2041132	0.81	Cancer
GSM2041133	0.783	Cancer
GSM2041134	0.703	Cancer
GSM2041135	0.78	Cancer
GSM2041136	0.592	Cancer
GSM2041137	0.654	Cancer
GSM2041138	0.665	Cancer
GSM2041139	0.863	Cancer
GSM2041140	0.693	Cancer
GSM2041141	0.678	Cancer
GSM2041142	0.827	Cancer
GSM2041143	0.793	Cancer
GSM2041144	0.51	Cancer
GSM2041145	0.51	Cancer
GSM2041146	0.413	Cancer
GSM2041147	0.812	Cancer
GSM2041148	0.582	Cancer
GSM2041149	0.795	Cancer
GSM2041150	0.623	Cancer
GSM2041151	0.844	Cancer
GSM2041152	0.845	Cancer
GSM2041153	0.637	Cancer
GSM2041154	0.622	Cancer
GSM2041155	0.595	Cancer
GSM2041156	0.759	Cancer
GSM2041157	0.585	Cancer
GSM2041158	0.859	Cancer
GSM2041159	0.815	Cancer
GSM2041160	0.834	Cancer
GSM2041161	0.694	Cancer
GSM2041162	0.804	Cancer
GSM2041163	0.31	Cancer
GSM2041164	0.903	Cancer
GSM2041165	0.714	Cancer
GSM2041166	0.598	Cancer
GSM2041167	0.29	Cancer
GSM2041168	0.2	Cancer
GSM2041169	0.555	Cancer
GSM2041170	0.977	Cancer
GSM2041171	0.578	Cancer
GSM2041172	0.775	Cancer
GSM2041173	0.725	Cancer
GSM2041174	0.594	Cancer
GSM2041175	0.665	Cancer
GSM2041176	0.673	Cancer
GSM2041177	0.802	Cancer
GSM2041178	0.665	Cancer
GSM2041179	0.912	Cancer
GSM2041180	0.735	Cancer
GSM2041181	0.885	Cancer
GSM2041182	0.796	Cancer
GSM2041183	0.259	Benign
GSM2041184	0.242	Benign
GSM2041185	0.299	Benign
GSM2041186	0.249	Benign
GSM2041187	0.26	Benign
GSM2041188	0.318	Benign
GSM2041189	0.277	Benign
GSM2041190	0.212	Benign
GSM2041191	0.256	Benign
GSM2041192	0.246	Benign
GSM2041193	0.222	Benign
GSM2041194	0.25	Benign
GSM2041195	0.286	Benign
GSM2041196	0.255	Benign
GSM2041197	0.379	Benign
GSM2041198	0.341	Benign
GSM2041199	0.306	Benign
GSM2041200	0.355	Benign
GSM2041201	0.162	Benign
GSM2041202	0.216	Benign
GSM2041203	0.399	Benign
GSM2041204	0.218	Benign
GSM2041205	0.429	Benign
GSM2041206	0.288	Benign
GSM2041207	0.325	Benign
GSM2041208	0.336	Benign
GSM2041209	0.29	Benign
GSM2041210	0.23	Benign
GSM2041211	0.468	Benign
GSM2041212	0.307	Benign
GSM2041213	0.307	Benign
GSM2041214	0.296	Benign
GSM2041215	0.366	Benign
GSM2041216	0.385	Benign
GSM2041217	0.401	Benign
GSM2041218	0.302	Benign
GSM2041219	0.341	Benign
GSM2041220	0.473	Benign
GSM2041221	0.33	Benign
GSM2041222	0.302	Benign
GSM2041223	0.309	Benign
GSM2041224	0.406	Benign
GSM2041225	0.319	Benign
GSM2041226	0.498	Benign
GSM2041227	0.375	Benign
GSM2041228	0.281	Benign
GSM2041229	0.25	Benign
GSM2041230	0.258	Benign
GSM2041231	0.255	Benign
GSM2041232	0.248	Benign
GSM2041233	0.392	Benign
GSM2041234	0.206	Benign
GSM2041235	0.383	Benign
GSM2041236	0.282	Benign
GSM2041237	0.243	Benign
GSM2041238	0.203	Benign
GSM2041239	0.181	Benign
GSM2041240	0.538	Benign
GSM2041241	0.349	Benign
GSM2041242	0.324	Benign
GSM2041243	0.878	Benign
GSM2041244	0.254	Benign
GSM2041245	0.243	Benign
GSM1340009	0.29	BPH
GSM1340010	0.42	BPH
GSM1340011	0.28	BPH
GSM1340012	0.29	BPH
GSM1340013	0.34	BPH
GSM1340014	0.29	BPH
GSM1340015	0.27	BPH
GSM1340016	0.27	BPH
GSM1340017	0.39	BPH
GSM1340018	0.24	BPH
GSM1340019	0.29	Normal
GSM1340020	0.27	Normal
GSM1340021	0.34	Normal
GSM1340022	0.34	Normal
GSM1340023	0.32	Normal
GSM1340024	0.48	Normal
GSM1337570	0.936	Cancer
GSM1337581	0.891	Cancer
GSM1337586	0.94	Cancer
GSM1337589	0.922	Cancer
GSM1337590	0.946	Cancer
GSM1337591	0.977	Cancer
GSM1337593	0.974	Cancer
GSM1337594	0.891	Cancer
GSM1337595	0.95	Cancer
GSM1337596	0.941	Cancer
GSM1337597	0.947	Cancer
GSM1337598	0.947	Cancer
GSM1337599	0.902	Cancer
GSM1337601	0.906	Cancer
GSM1337611	0.982	Cancer
GSM1337630	0.94	Cancer
GSM1337634	0.868	Cancer
GSM1337645	0.925	Cancer
GSM1337668	0.919	Cancer
GSM1337673	0.966	Cancer
GSM1337675	0.943	Cancer
GSM1337676	0.929	Cancer
GSM1337680	0.882	Cancer
GSM1337683	0.736	Cancer
GSM1337687	0.826	Cancer
GSM1337688	0.853	Cancer
GSM1278561	0.496	Benign
GSM1278562	0.497	Benign
GSM1278563	0.308	Benign
GSM1278564	0.423	Benign
GSM1278565	0.295	Benign
GSM1278566	0.902	Cancer
GSM1278567	0.908	Cancer
GSM1278568	0.879	Cancer
GSM1278569	0.939	Cancer
GSM1278570	0.909	Cancer
GSM1278571	0.858	Cancer
GSM1278572	0.835	Cancer
GSM1278573	0.782	Cancer
GSM1278574	0.765	Cancer
GSM1278575	0.885	Cancer
GSM1278576	0.907	Cancer
GSM1278577	0.795	Cancer
GSM1278578	0.925	Cancer
GSM1278579	0.929	Cancer
GSM1278580	0.85	Cancer
GSM1278581	0.861	Cancer
GSM1278582	0.914	Cancer
GSM1278583	0.892	Cancer
GSM1278584	0.896	Cancer
GSM1278585	0.868	Cancer
GSM1278586	0.84	Cancer
GSM1278587	0.836	Cancer
GSM1278588	0.914	Cancer
GSM1278589	0.927	Cancer
GSM1278590	0.906	Cancer
The files presented here include all of the data used for the validation of the algoritm in addition to a total of 6 samples from tissues other than prostate containing metastasis from PCa.
Duplicated array files between datasets “GSE83917” and “GSE55479” were identified and removed.

## Sheet: Table S9- Replicates
Table S9- Prediction scores generated for 61 technical replicates from GSE83917 and GSE55479
Array file	Prediction score	True class
GSM2221472_5760666031_R05C01	0.906375	Cancer
GSM2221473_5760666031_R06C01	0.880934	Cancer
GSM2221474_5760666031_R01C02	0.908027	Cancer
GSM2221475_5760666031_R02C02	0.929152	Cancer
GSM2221477_5760666031_R04C02	0.945914	Cancer
GSM2221478_5760666031_R05C02	0.958193	Cancer
GSM2221540_5765141058_R06C01	0.918626	Cancer
GSM2221541_5765141058_R03C02	0.865178	Cancer
GSM2221542_5765141058_R05C02	0.966153	Cancer
GSM2221543_5765141058_R06C02	0.831909	Cancer
GSM2221544_5765141060_R01C01	0.93561	Cancer
GSM2221545_5765141060_R02C01	0.915193	Cancer
GSM2221546_5765141060_R03C01	0.923212	Cancer
GSM2221547_5765141060_R04C01	0.95222	Cancer
GSM2221548_5765141060_R05C01	0.878528	Cancer
GSM2221549_5765141060_R06C01	0.955635	Cancer
GSM2221550_5765141060_R01C02	0.941719	Cancer
GSM2221551_5765141060_R02C02	0.931832	Cancer
GSM2221552_5765141060_R03C02	0.965213	Cancer
GSM2221563_3999510001_R05C01	0.944231	Cancer
GSM2221564_3999510001_R06C01	0.952091	Cancer
GSM2221565_3999510001_R01C02	0.919575	Cancer
GSM2221569_3999510001_R05C02	0.832728	Cancer
GSM2221570_3999510044_R04C01	0.93116	Cancer
GSM2221571_3999510044_R05C01	0.95301	Cancer
GSM2221572_3999510044_R06C01	0.948072	Cancer
GSM2221573_3999510046_R01C01	0.949484	Cancer
GSM2221574_3998579082_R01C01	0.848645	Cancer
GSM2221575_3998579082_R02C01	0.939402	Cancer
GSM2221576_3998579082_R03C01	0.934488	Cancer
GSM2221578_3998579082_R04C01	0.88989	Cancer
GSM2221580_3998579082_R05C01	0.891834	Cancer
GSM2221583_3998579082_R01C02	0.965446	Cancer
GSM2221584_3998579082_R04C02	0.937979	Cancer
GSM2221585_3998579082_R05C02	0.934409	Cancer
GSM2221586_3998579083_R01C01	0.919757	Cancer
GSM2221587_3998579083_R02C01	0.939328	Cancer
GSM2221588_3998579083_R04C01	0.932501	Cancer
GSM2221589_3998579083_R01C02	0.946869	Cancer
GSM2221590_3998579083_R03C02	0.936306	Cancer
GSM2221591_3998579083_R05C02	0.963862	Cancer
GSM2221592_3998579112_R01C01	0.900881	Cancer
GSM2221593_3998579112_R02C01	0.91382	Cancer
GSM2221594_3998579112_R03C01	0.856873	Cancer
GSM2221595_3998579112_R04C01	0.809334	Cancer
GSM2221596_3998579112_R05C01	0.947299	Cancer
GSM2221597_3998579112_R06C01	0.943347	Cancer
GSM2221598_3998579112_R01C02	0.76711	Cancer
GSM2221599_3998579112_R02C02	0.885744	Cancer
GSM2221600_3998579112_R03C02	0.921132	Cancer
GSM2221601_3998579112_R04C02	0.656024	Cancer
GSM2221602_3998579112_R06C02	0.832019	Cancer
GSM2221603_3998579155_R04C01	0.299416	Cancer*
GSM2221608_3998579082_R03C02	0.871039	Cancer
GSM2221609_5765141058_R01C02	0.867201	Cancer
GSM2221610_3998579112_R05C02	0.802527	Cancer
GSM1337631	0.934689	Cancer
GSM1337691	0.932116	Cancer
GSM1337693	0.901219	Cancer
GSM1337705	0.963449	Cancer
GSM1337706	0.950979	Cancer
*The only misclassification was found for GSM2221603 (0.299) which is a technical replicate of another file “GSM2221531” from Table S8 with a similar prediction score (0.299).
